# Supplementary material for: N-Heterocyclic carbene-based tetradentate platinum(ii) complexes for phosphorescent OLEDs with high brightness
Source: Royal Society of Chemistry journal article supplement (doi:10.1039/d1tc05207a), 2021-11-20
Supplement: d1tc05207a1.pdf [file d1tc05207a1.pdf]

## Supporting Information

### ***N*-Heterocyclic Carbene-Base Tetradentate Platinum(II) Complexes for Phosphorescent OLEDs with High Maximum Brightness**

Guijie Li,\* Shun Liu, Yulu Sun, Weiwei Lou, Yun-Fang Yang, and Yuanbin She\*

College of Chemical Engineering, Zhejiang University of Technology, Hangzhou, Zhejiang 310014,  
P. R. China

E-mail: sheyb@zjut.edu.cn; guijieli@zjut.edu.cn

## Table of Contents

|    |                                                                                                                                          |           |
|----|------------------------------------------------------------------------------------------------------------------------------------------|-----------|
| 1  | General Information                                                                                                                      | S-3–S-4   |
| 2  | <b>Figure S1.</b> The cyclic voltammetry (CV) of tetradentate Pt(II) complexes                                                           | S-5       |
| 3  | <b>Figure S2.</b> The different pulsed voltammetry (DPV) of tetradentate Pt(II) complexes                                                | S-6       |
| 4  | <b>Table S1.</b> DFT Calculations for Pt(II) Complexes                                                                                   | S-7       |
| 5  | <b>Table S2.</b> Selected Bond Lengths, Bond Angles and Dihedral Angles for Tetradentate Pt(II) Complexes Based on the DFT Calculations. | S-8       |
| 6  | <b>Figure S3.</b> Density functional theory calculations of frontier orbitals for Pt(II) complexes based on optimized $S_0$ geometries.  | S-9       |
| 7  | <b>Figure S4.</b> Transient decay spectra of (a) Pt(NHC-1), (b) Pt(Ph/NHC), (c) Pt(Py/NHC) and (d) Pt(NHC-2) in various conditions.      | S-10      |
| 8  | <b>Figure S5.</b> Bidentate, tridentate and tetradentate Pt(II) complexes for green to yellow OLEDs discussed in this study.             | S-11      |
| 9  | <b>Table S3.</b> Device Performances Comparison for Pt(II) Complexes-Based Green to Orange OLEDs                                         | S-12      |
| 10 | Detailed synthetic procedures of the Pt(II) complexes                                                                                    | S-13–S-21 |
| 11 | $^1\text{H}$ , $^{13}\text{C}$ NMR spectra and HRMS                                                                                      | S-22–S-49 |
| 12 | Cartesian coordinates of the optimized structures                                                                                        | S-50–S-58 |
| 13 | References                                                                                                                               | S-59–S-61 |

## General Information.

**Synthesis and Characterization.** Unless noted, all commercial reagents were purchased and used as received without further purification.  $^1\text{H}$  NMR spectra were recorded at 400 or 500 MHz, and  $^{13}\text{C}$  NMR spectra were recorded at 100 or 150 MHz NMR instruments in  $\text{CDCl}_3$  or  $\text{DMSO}-d_6$  solutions and chemical shifts were referenced to tetramethylsilane (TMS) or residual protiated solvent. If  $\text{CDCl}_3$  was used as solvent,  $^1\text{H}$  and  $^{13}\text{C}$  NMR spectra were recorded with TMS ( $\delta = 0.00$  ppm) and  $\text{CDCl}_3$  ( $\delta = 77.00$  ppm) as internal references, respectively. If  $\text{DMSO}-d_6$  was used as solvent,  $^1\text{H}$  and  $^{13}\text{C}$  NMR spectra were recorded with TMS ( $\delta = 0.00$  ppm) and  $\text{DMSO}-d_6$  ( $\delta = 39.52$  ppm) as internal references, respectively. The following abbreviations (or combinations thereof) were used to explain  $^1\text{H}$  NMR multiplicities: s = singlet, d = doublet, t = triplet, q = quartet, p = quintet, m = multiplet, br = broad. All of the new compounds were analyzed for HRMS on a Waters mass spectrometer using electrospray ionization in positive ion mode of ESI-Q-TOF.

**Electrochemistry.** Cyclic voltammetry and different pulsed voltammetry were performed using a CH1760E electrochemical analyzer according previous report.<sup>1</sup> 0.1 M tetra-*n*-butylammonium hexafluorophosphate was used as the supporting electrolyte, anhydrous *N,N*-dimethylformamide, was used as the solvents for the  $E_{\text{ox}}$  and  $E_{\text{red}}$  measurements, and the solutions were bubbled with nitrogen for 15 min prior to the test. Silver wire, platinum wire and glassy carbon were used as pseudoreference electrode, counter electrode, and working electrode respectively. Scan rate was 300 mV/s. The redox potentials are based on the values measured from different pulsed voltammetry and are reported relative to an internal reference ferrocenium/ferrocene ( $\text{Cp}_2\text{Fe}/\text{Cp}_2\text{Fe}^+$ ).<sup>2</sup> The reversibility of reduction or oxidation was determined using CV.<sup>3</sup> As defined, if the magnitudes of the peak anodic and the peak cathodic current have an equal magnitude as scan speeds of 100 mV/s or slower, then the process is considered reversible; if the magnitudes of the peak anodic and the peak cathodic currents are not equal, but the return sweeps are nonzero, the process is considered quasi-reversible; otherwise, the process is considered irreversible.<sup>2,3</sup>

**DFT Calculations.** The theoretical calculations of the Pt(II) complexes were performed using Gaussian 09. The molecular geometries of ground states ( $S_0$ ) were optimized with the density functional theory (DFT) method. The DFT calculations were performed using a B3LYP function with a basis set of 6-31G(d) for C, H, O and N atoms and a LANL2DZ basis set for Pt atom.<sup>4,5</sup>

**Photophysical Measurements.** The absorption spectra were measured on an Agilent 8453 UV–VS Spectrometer. Steady state emission experiments and lifetime measurements were performed on a Horiba Jobin Yvon FluoroLog-3 spectrometer. Low temperature (77 K) emission spectra and lifetimes were measured in 2-MeTHF cooled with liquid nitrogen.

**Device Fabrication and Characterization.** All devices were fabricated by vacuum thermal evaporation, and were tested outside glove box after encapsulation. Prior to deposition, the prepatterned ITO coated glass substrates were cleaned by subsequent sonication in deionized water, acetone, and isopropanol. Organic layers were deposited at rates of 0.5 to 2.0 Å/s, monitored by crystal oscillator, in a custom-made vacuum thermal evaporation chamber built by LN Inc (LN-1082FS). The Al cathode was deposited through a shadow mask without breaking vacuum, defining device areas of 0.09 cm<sup>2</sup>. The current-voltage-luminance characteristics were measured using a Keithley 2400 SourceMeter in conjunction with a PMTH-S1-CR131A Photodiode. Electroluminescent spectra were measured with an Ocean Optics USB2000 spectrometer.

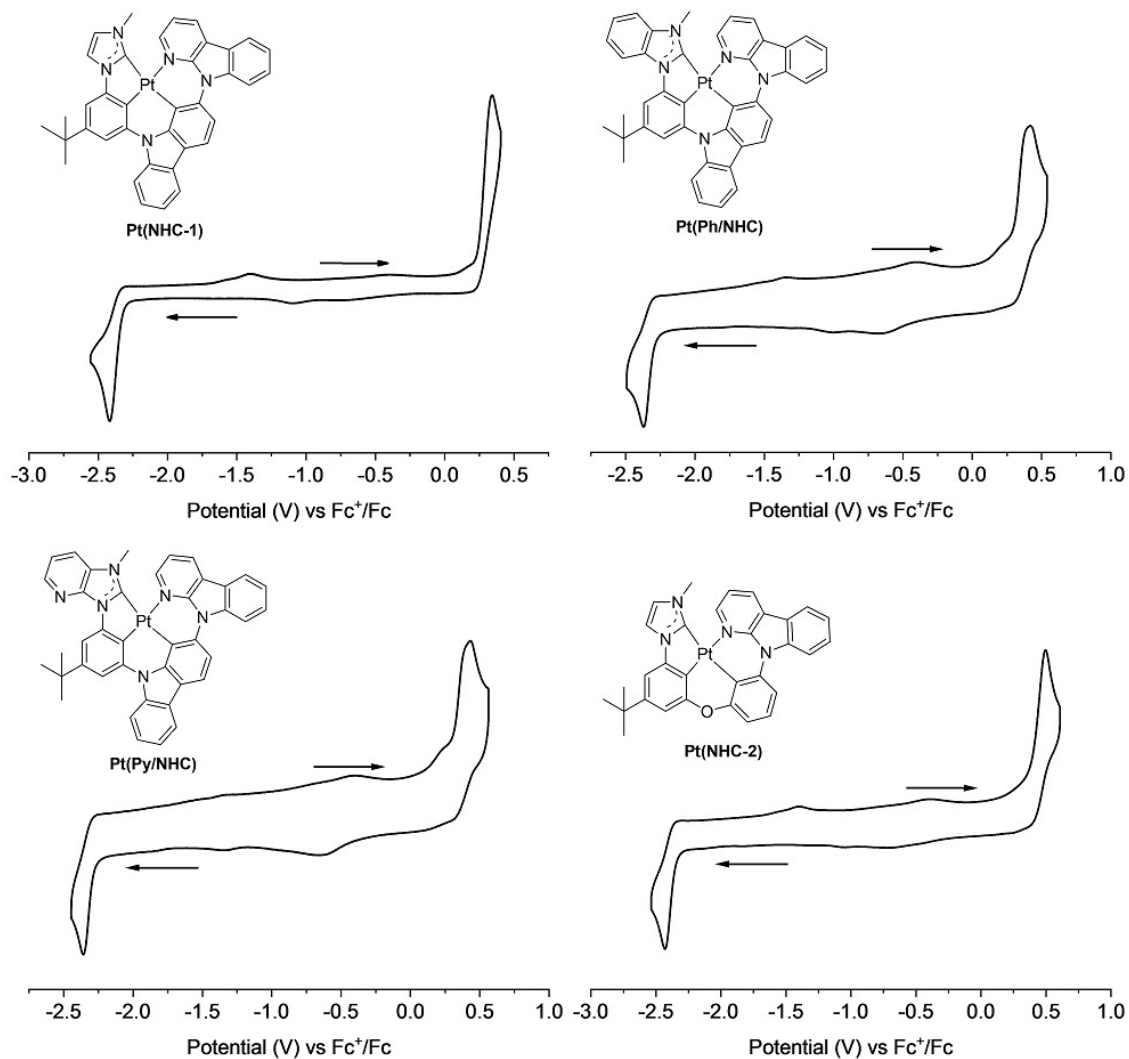

**Figure S1.** The cyclic voltammetry (CV) of tetradentate Pt(II) complexes measured in *N,N*-dimethylformamide under an nitrogen atmosphere.

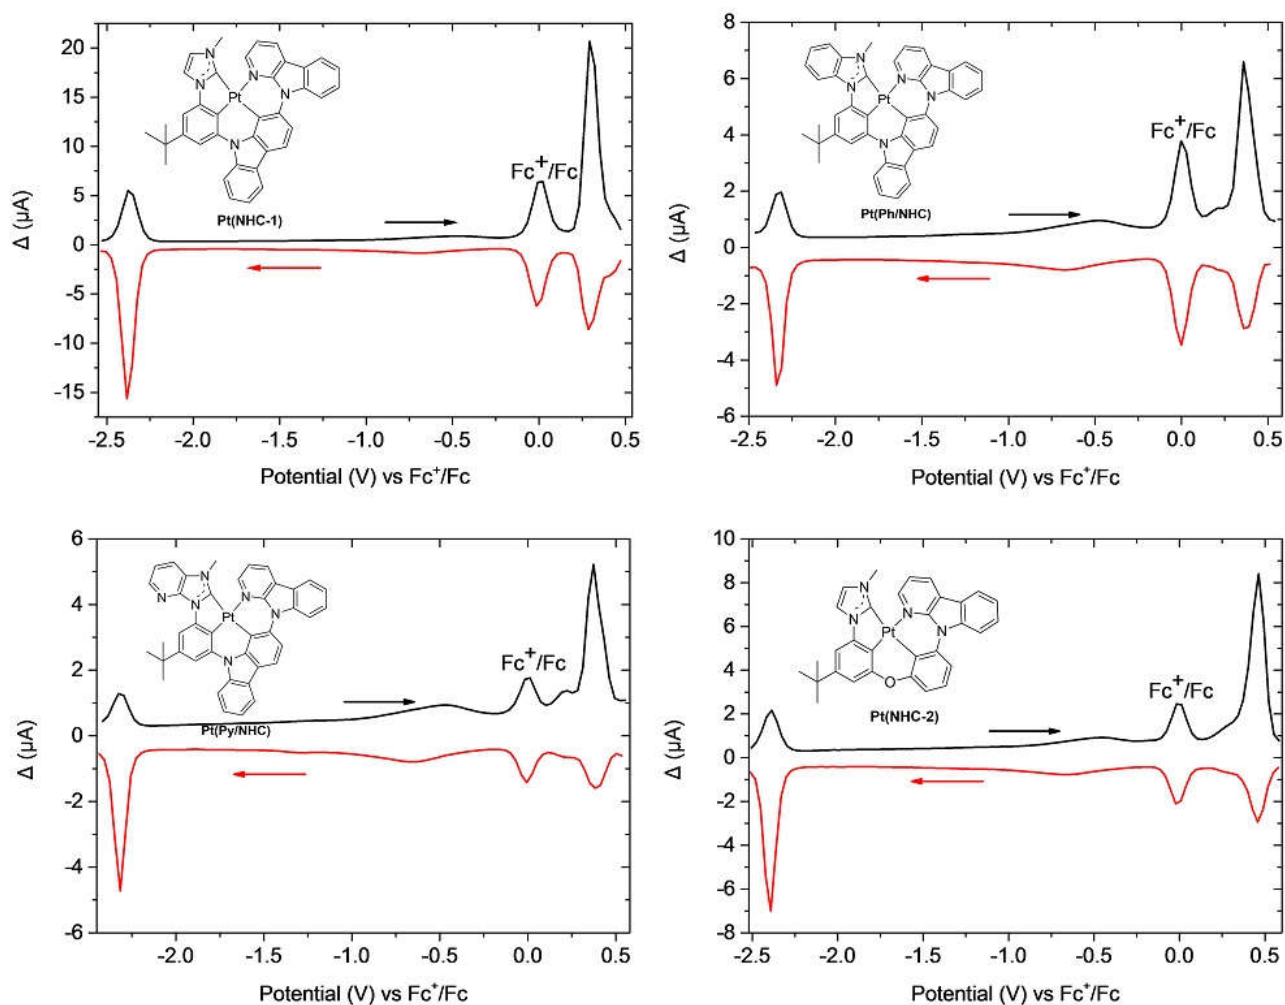

**Figure S2.** The different pulsed voltammetry (DPV) of tetradentate Pt(II) complexes measured in *N,N*-dimethylformamide under an nitrogen atmosphere.

| Table S1. DFT Calculations for Pt(II) Complexes <sup>a</sup> |                                                                                     |                                                                                     |                                                                                       |
|--------------------------------------------------------------|-------------------------------------------------------------------------------------|-------------------------------------------------------------------------------------|---------------------------------------------------------------------------------------|
| Pt(II) complexes                                             | Front view                                                                          | Side view                                                                           | Top view                                                                              |
| Pt(NHC-1)                                                    | 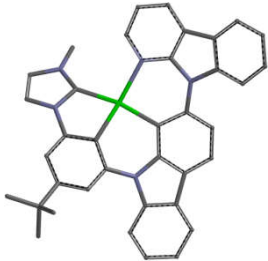   | 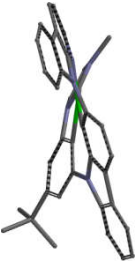   | 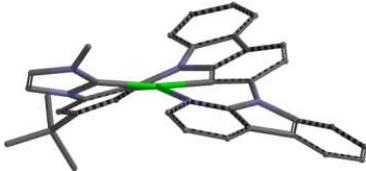   |
| Pt(Ph/NHC)                                                   | 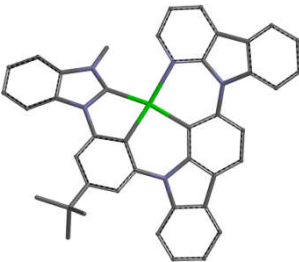   | 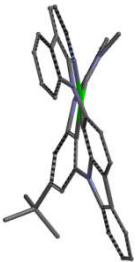   | 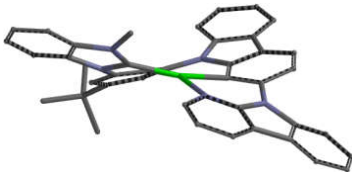   |
| Pt(Py/NHC)                                                   | 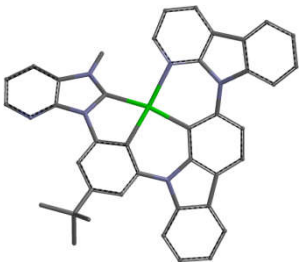  | 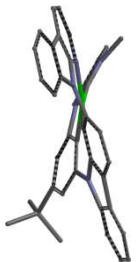  | 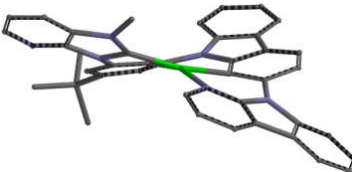 |
| Pt(NHC-2)                                                    | 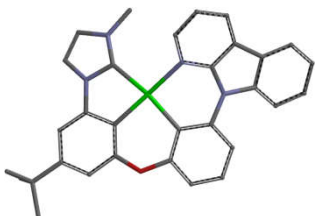 | 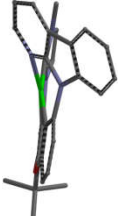 | 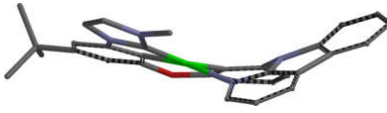 |

<sup>a</sup>Optimized  $S_0$  were calculated using a B3LYP method with a basic set of 6-31G(d) for C, H, O and N atoms and a LANL2DZ basic set for Pt atoms.

**Table S2. Selected Bond Lengths (Å), Bond Angles (°) and Dihedral Angles (°) for Tetradentate Pt(II) Complexes Based on the DFT Calculations.**

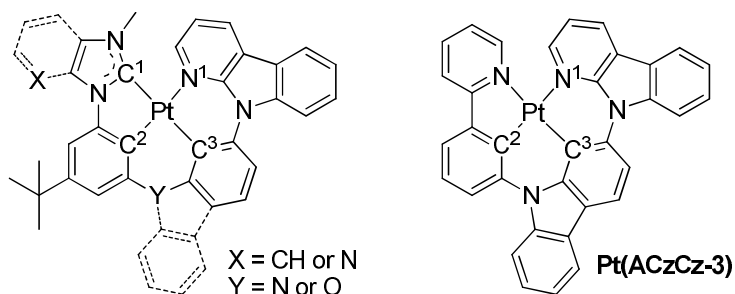

| metal complexes          | Pt–C <sup>1</sup> (N)             |                                   |                                   | Pt–C <sup>2</sup>                 | Pt–C <sup>3</sup>                 | Pt–N <sup>1</sup>                 |                             |
|--------------------------|-----------------------------------|-----------------------------------|-----------------------------------|-----------------------------------|-----------------------------------|-----------------------------------|-----------------------------|
| Pt(NHC-1)                | 2.082                             |                                   |                                   | 1.997                             | 2.047                             | 2.173                             |                             |
| Pt(Ph/NHC)               | 2.056                             |                                   |                                   | 1.996                             | 2.050                             | 2.176                             |                             |
| Pt(Py/NHC)               | 2.055                             |                                   |                                   | 1.998                             | 2.050                             | 2.180                             |                             |
| Pt(NHC-2)                | 2.090                             |                                   |                                   | 1.998                             | 2.046                             | 2.175                             |                             |
| Pt(ACzCz-3) <sup>6</sup> | 2.200                             |                                   |                                   | 1.984                             | 2.007                             | 2.200                             |                             |
| metal complexes          | C <sup>1</sup> –Pt–C <sup>2</sup> | C <sup>2</sup> –Pt–C <sup>3</sup> | C <sup>3</sup> –Pt–N <sup>1</sup> | N <sup>1</sup> –Pt–C <sup>1</sup> | C <sup>1</sup> –Pt–C <sup>3</sup> | C <sup>2</sup> –Pt–N <sup>1</sup> | dihedral angle <sup>a</sup> |
| Pt(NHC-1)                | 78.77                             | 91.27                             | 90.69                             | 100.88                            | 167.34                            | 165.89                            | 46.72                       |
| Pt(Ph/NHC)               | 78.64                             | 91.64                             | 90.54                             | 101.05                            | 166.96                            | 165.57                            | 48.47                       |
| Pt(Py/NHC)               | 78.84                             | 91.37                             | 90.62                             | 100.90                            | 167.23                            | 165.67                            | 48.15                       |
| Pt(NHC-2)                | 79.25                             | 90.73                             | 89.24                             | 102.19                            | 165.98                            | 170.94                            | 49.19                       |

<sup>a</sup>Dihedral angle between terminal NHC and ACz planes. Optimized S<sub>0</sub> were calculated using a B3LYP method with a basic set of 6-31G(d) for C, H, O and N atoms and a LANL2DZ basic set for Pt atoms.

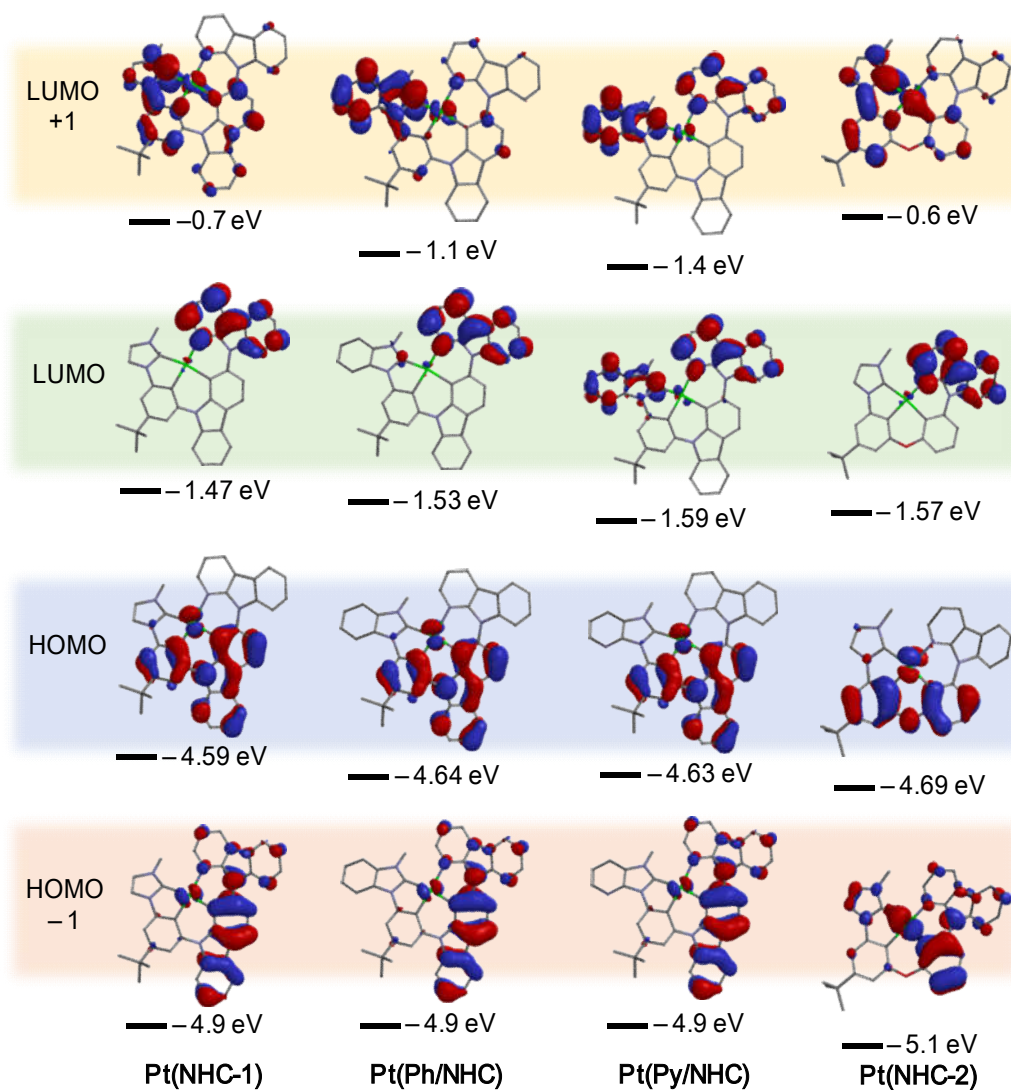

**Figure S3.** Density functional theory calculations of frontier orbitals for Pt(II) complexes based on optimized  $S_0$  geometries. The H atoms were omitted for clarity.

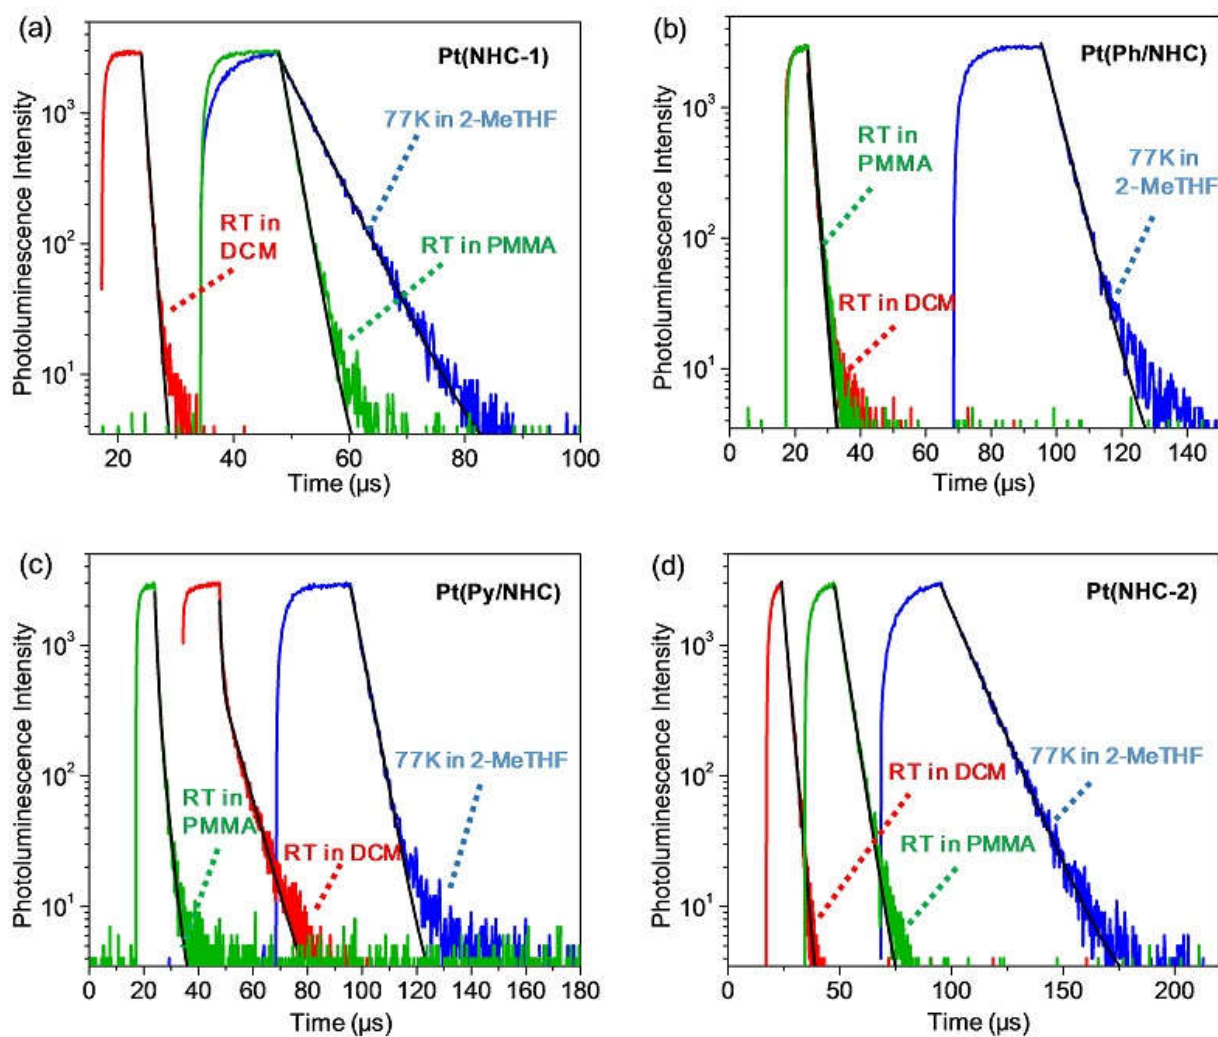

**Figure S4.** Transient decay spectra of (a) Pt(NHC-1), (b) Pt(Ph/NHC), (c) Pt(Py/NHC) and (d) Pt(NHC-2) in various conditions. The solid black lines represent biexponential fit of the experimental data.

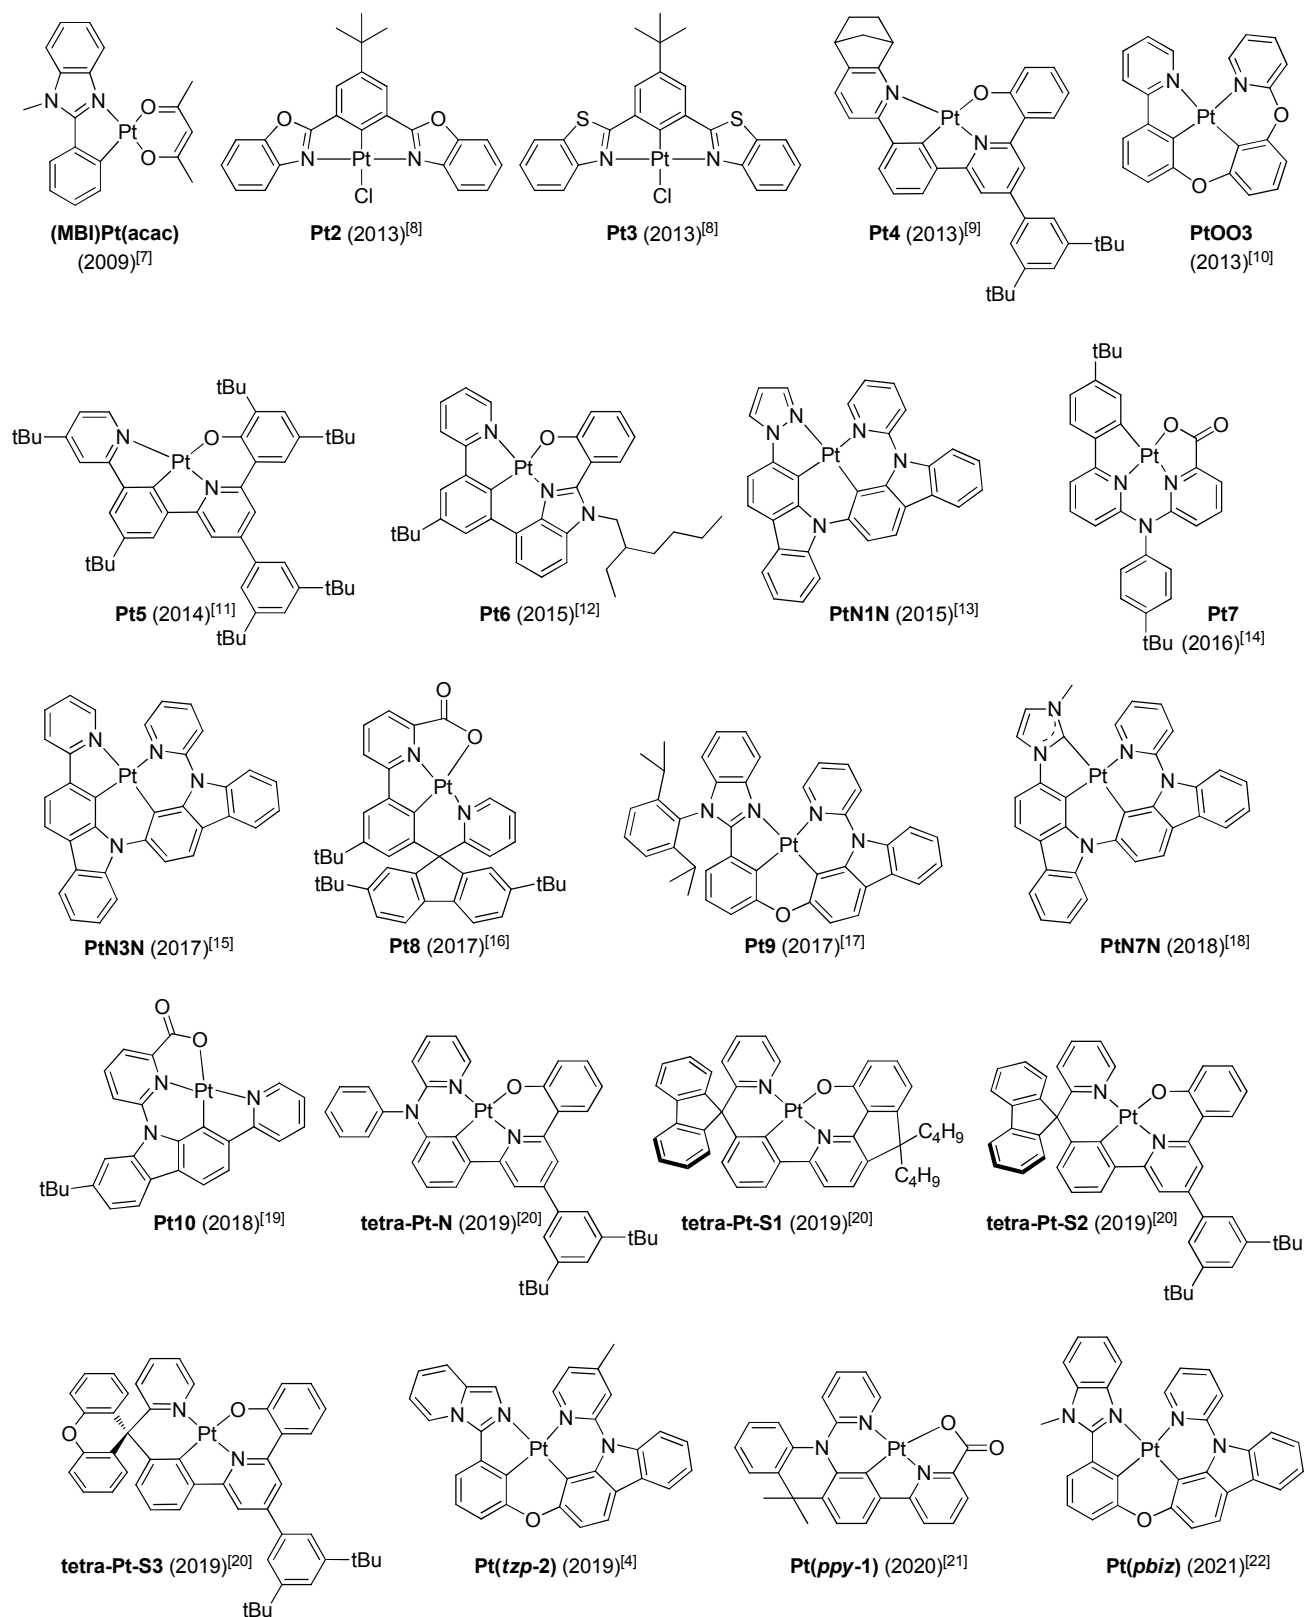

**Figure S5.** Bidentate, tridentate and tetradentate Pt(II) complexes for green to yellow OLEDs discussed in this study.

**Table S3.** Device Performances Comparison for Pt(II) Complexes-Based Green to Orange OLEDs

| dopant/host                            | $\lambda_{\text{EL}}$ (nm) | peak EQE (%) | CIE (x, y)     | $L_{\text{max}}$ (cd/m <sup>2</sup> ) | reference        |
|----------------------------------------|----------------------------|--------------|----------------|---------------------------------------|------------------|
| <b>(MBI)Pt(acac)/CBP</b>               | 534                        | —            | (0.38, 0.55)   | 13605                                 | [7]              |
| <b>Pt2/CBP</b>                         | ~535                       | 4.6          | (0.50, 0.49)   | —                                     | [8]              |
| <b>Pt3/CBP</b>                         | ~555                       | 6.9          | (0.50, 0.49)   | —                                     | [8]              |
| <b>Pt4/mCP</b>                         | ~540                       | 18.2         | (0.282, 0.657) | —                                     | [9]              |
| <b>PtNOO3/26mCPy</b>                   | ~505                       | 22.3         | —              | —                                     | [10]             |
| <b>Pt5/TCTA</b>                        | ~560                       | 27.1         | (0.41, 0.57)   | 2900                                  | [11]             |
| <b>Pt6/TCTA</b>                        | 512                        | 21.4         | (0.33, 0.61)   | —                                     | [12]             |
| <b>PtN1N/26mCPy</b>                    | 498                        | 26.1         | (0.15, 0.56)   | —                                     | [13]             |
| <b>Pt7/mCP</b>                         | 540                        | 13.8         | (0.36, 0.58)   | —                                     | [14]             |
| <b>PtN3N/26mCPy</b>                    | 584                        | 18.2         | (0.55, 0.45)   | —                                     | [15]             |
| <b>Pt8/mCP</b>                         | 520                        | 22.9         | (0.36, 0.60)   | —                                     | [16]             |
| <b>Pt9/26mCPy</b>                      | 541                        | 22.3         | (0.31, 0.62)   | —                                     | [17]             |
| <b>PtN7N/BN-DBC-Ph<sub>2</sub></b>     | ~520                       | ~22.5        | (0.27, 0.67)   | —                                     | [18]             |
| <b>Pt10/mCP</b>                        | 552                        | 12.6         | (0.49, 0.51)   | —                                     | [19]             |
| <b>tetra-Pt-N/o-CzPy<sup>a</sup></b>   | ~555                       | 16.83        | (0.48, 0.51)   | 18500                                 | [20]             |
| <b>tetra-Pt-S1/o-CzPy<sup>a</sup></b>  | ~510                       | 16.63        | (0.29, 0.64)   | 49600                                 | [20]             |
| <b>tetra-Pt-S2/o-CzPy<sup>a</sup></b>  | ~500                       | 3.89         | (0.28, 0.58)   | 5970                                  | [20]             |
| <b>tetra-Pt-S3/m-TPAPy<sup>a</sup></b> | ~505                       | 22.9         | (0.28, 0.63)   | 37600                                 | [20]             |
| <b>Pt(<i>tzp</i>-2)/mCBP</b>           | 545                        | 8.7          | (0.31, 0.61)   | 28280                                 | [4]              |
| <b>Pt(<i>ppy</i>-1)/26mCPy</b>         | 516                        | 18.5         | (0.298, 0.634) | 40979                                 | [21]             |
| <b>Pt(<i>pbiz</i>)/mCBP</b>            | 505                        | 25.5         | (0.265, 0.602) | 49781                                 | [22]             |
| <b>Pt(<i>pbiz</i>)/26mCPy</b>          | 501                        | 21.6         | (0.251, 0.595) | 55481                                 | [22]             |
| <b>Pt(NHC-1)/mCBP</b>                  | 512                        | 13.9         | (0.288, 0.588) | 60275                                 | <b>This work</b> |
| <b>Pt(NHC-1)/26mCPy</b>                | 509                        | 13.1         | (0.261, 0.575) | 64416                                 | <b>This work</b> |

<sup>a</sup> Solution-processed OLED.

## Experimental Procedures

### Synthesis of Pt(NHC-1):

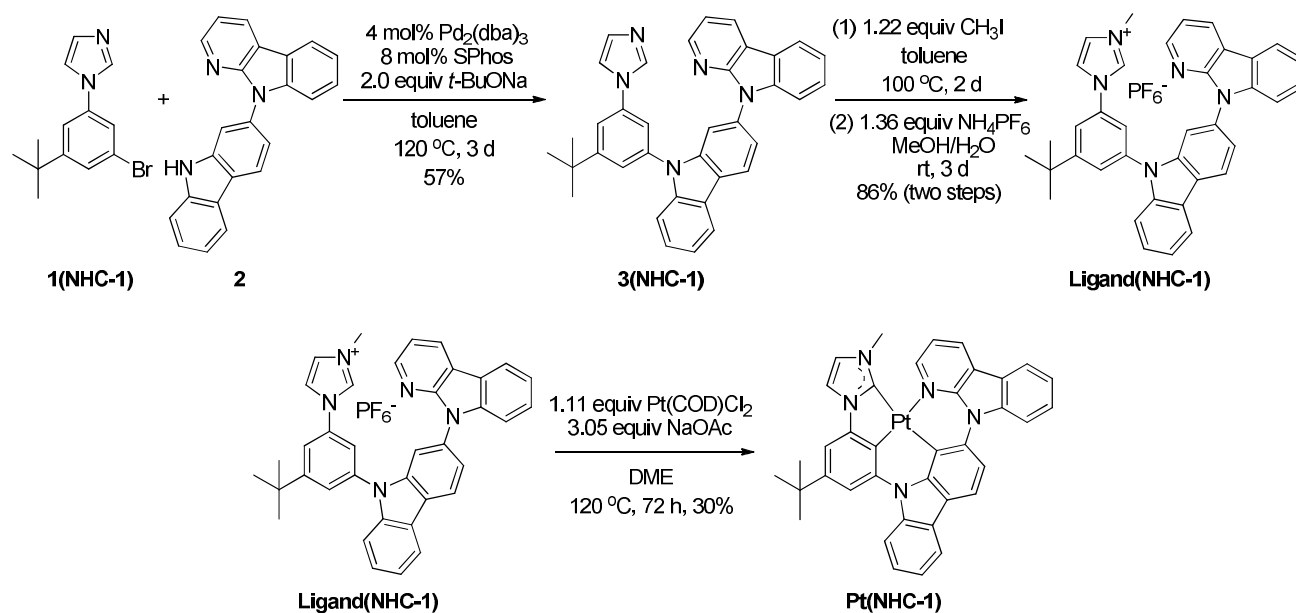

**Synthesis of 3(NHC-1):** A mixture of 1-(3-bromo-5-(*tert*-butyl)phenyl)-1*H*-imidazole **1(NHC-1)** (112 mg, 0.40 mmol, 1.0 equiv, synthesized according our previous report.<sup>23</sup>), 9-(9*H*-carbazol-2-yl)-9*H*-pyrido[2,3-*b*]indole **2** (133 mg, 0.40 mmol, 1.0equiv, synthesized according our previous report.<sup>6</sup>), Pd<sub>2</sub>(dba)<sub>3</sub> (15 mg, 0.016 mmol, 4 mol%), SPhos (13 mg, 0.032 mmol, 8 mol%) and *t*-BuONa (77 mg, 0.80 mmol, 2.0 equiv) in toluene (5 mL) was stirred in a sealed vessel at a temperature of 120 °C under a nitrogen atmosphere for 3 days, then cooled down to ambient temperature. The reaction was concentrated under reduced pressure, then the residue was purified through column chromatography on silica gel (eluent: petroleum ether/ ethyl acetate = 6:1–2:1) to obtain the desired product as white foamy solid 121 mg in 57% yield. <sup>1</sup>H NMR (500 MHz, CDCl<sub>3</sub>): δ (ppm) 1.41 (s, 9H), 7.24–7.26 (m, 2H), 7.32–7.40 (m, 3H), 7.43–7.50 (m, 4H), 7.54–7.57 (m, 2H), 7.59 (dd, *J* = 8.5, 2.0 Hz, 1H), 7.74 (t, *J* = 2.0 Hz, 1H), 7.76 (d, *J* = 1.5 Hz, 1H), 8.06 (s, 1H), 8.13 (d, *J* = 7.5 Hz, 1H), 8.23 (d, *J* = 8.0 Hz, 1H), 8.36 (d, *J* = 8.5 Hz, 1H), 8.39 (dd, *J* = 7.5, 1.5 Hz, 1H), 8.48 (dd, *J* = 8.5, 2.0 Hz, 1H). <sup>13</sup>C NMR (125 MHz, CDCl<sub>3</sub>): δ (ppm) 31.16, 35.30, 109.07, 109.62, 110.37, 116.12, 116.35, 117.03, 117.56, 118.38, 119.59, 120.64, 120.72, 120.74, 120.78, 120.93, 121.29, 122.94, 123.26, 123.29, 126.44, 126.90, 128.28, 130.38, 134.24, 135.60, 138.45, 138.62, 140.32, 141.03, 141.17, 146.44, 152.12, 155.65.

**Synthesis of Ligand(NHC-1):** A solution of CH<sub>3</sub>I (426 mg, 3.00 mmol, 1.22 equiv) and **3(NHC-1)** (1.30 g, 2.45 mmol, 1.00 equiv) in toluene (30 mL) was stirred in a sealed vessel at a

temperature of 100 °C for 2 day, then cooled down to ambient temperature. The precipitate was filtered off and washed with petroleum ether (30 mL), dried under reduced pressure to afford a gray solid which was used directly for the next step. The gray solid was added to a mixture of MeOH/H<sub>2</sub>O (30 mL/20 mL), then stirred for a few minutes until the solid was entirely dissolved. Then NH<sub>4</sub>PF<sub>6</sub> (544 mg, 3.34 mmol, 1.36 equiv) was added to the solution. The mixture was stirred at room temperature for 3 days, diluted with water, and removed most of the solvent methanol under reduced pressure. The precipitate was collected through filtration, washed with water and petroleum ether. The gray solid was dried under reduced pressure to give the desired product 1.46 g in 86% yield. <sup>1</sup>H NMR (500 MHz, DMSO-*d*<sub>6</sub>): δ (ppm) 1.41 (s, 9H), 3.90 (s, 3H), 7.33–7.38 (m, 2H), 7.42 (t, *J* = 7.0 Hz, 1H), 7.48–7.51 (m, 1H), 7.53–7.56 (m, 1H), 7.59–7.65 (m, 3H), 7.73 (d, *J* = 1.5 Hz, 1H), 7.85 (t, *J* = 1.5 Hz, 1H), 7.89 (t, *J* = 1.5 Hz, 1H), 7.99–8.01 (m, 2H), 8.30 (d, *J* = 8.0 Hz, 1H), 8.35 (t, *J* = 2.0 Hz, 1H), 8.39–8.40 (m, 2H), 8.53 (d, *J* = 8.5 Hz, 1H), 8.64 (dd, *J* = 7.5, 1.5 Hz, 1H), 9.77 (s, 1H). <sup>13</sup>C NMR (125 MHz, DMSO-*d*<sub>6</sub>): δ (ppm) 30.77, 35.39, 36.12, 108.70, 110.06, 110.39, 115.74, 116.60, 117.41, 118.20, 119.77, 120.41, 120.92, 120.97, 121.00, 121.26, 121.45, 121.53, 122.14, 122.71, 124.19, 124.73, 126.85, 127.24, 129.00, 134.12, 136.11, 136.39, 137.87, 139.57, 140.22, 140.61. HRMS (ESI): calcd for C<sub>37</sub>H<sub>32</sub>N<sub>5</sub> [M]<sup>+</sup> 546.2652, found 546.2650.

**Synthesis of Pt(NHC-1):** A mixture of **Ligand(NHC-1)** (97 mg, 0.140 mmol, 1.0 equiv), Pt(COD)Cl<sub>2</sub> (58 mg, 0.155 mmol, 1.11 equiv) and NaOAc (35 mg, 0.427 mmol, 3.05 equiv) in DME (3 mL) was stirred in a sealed vessel at a temperature of 120 °C under a nitrogen atmosphere for 3 days, then cooled down to ambient temperature. The reaction was concentrated under reduced pressure, then the residue was purified through column chromatography on silica gel (eluent: petroleum ether/CH<sub>2</sub>Cl<sub>2</sub> = 5:1–1:1) to obtain the desired product as a yellow solid 31 mg in 30% yield. <sup>1</sup>H NMR (500 MHz, DMSO-*d*<sub>6</sub>): δ (ppm) 1.46 (s, 9H), 3.56 (s, 3H), 7.31 (t, *J* = 7.0 Hz, 1H), 7.40 (d, *J* = 1.5 Hz, 1H), 7.42 (d, *J* = 1.0 Hz, 1H), 7.46–7.54 (m, 3H), 7.70–7.73 (m, 1H), 7.80 (d, *J* = 8.0 Hz, 1H), 7.97 (d, *J* = 8.0 Hz, 2H), 8.20–8.28 (m, 4H), 8.44 (d, *J* = 7.5 Hz, 1H), 8.98 (d, *J* = 7.5 Hz, 1H), 9.42 (dd, *J* = 5.5, 1.0 Hz, 1H). <sup>13</sup>C NMR (125 MHz, DMSO-*d*<sub>6</sub>): δ (ppm) 31.47, 34.95, 37.42, 104.57, 109.40, 110.63, 114.06, 115.15, 116.02, 116.36, 117.13, 117.29, 119.43, 120.25, 120.29, 122.17, 122.31, 122.35, 123.24, 124.82, 126.11, 126.32, 127.97, 130.31, 135.86, 136.96, 138.93, 139.22, 141.93, 146.90, 146.96, 149.15, 153.35, 180.47. HRMS (ESI): calcd for C<sub>37</sub>H<sub>30</sub>N<sub>5</sub>Pt [M+H]<sup>+</sup> 739.2143, found 739.2121.

## Synthesis of **Pt(Ph/NHC)**:

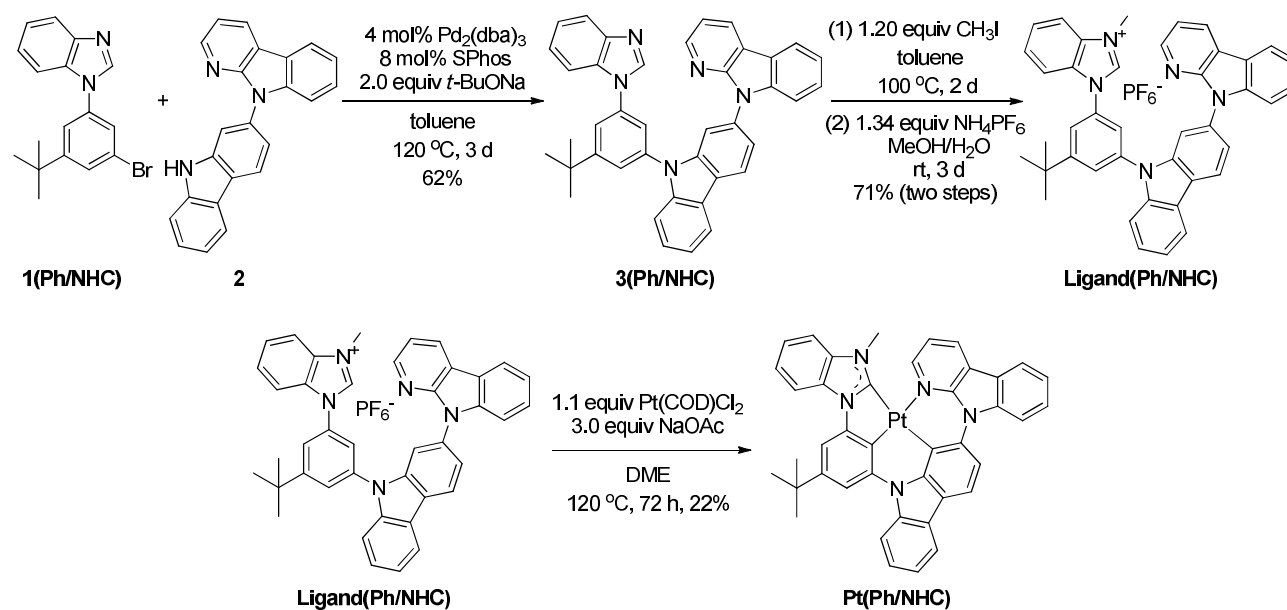

Synthesis of **3(Ph/NHC)**: A mixture of

1-(3-bromo-5-(*tert*-butyl)phenyl)-1*H*-benzo[*d*]imidazole **1(Ph/NHC)** (99 mg, 0.30 mmol, 1.0 equiv, synthesized according our previous report.<sup>24</sup>), 9-(9*H*-carbazol-2-yl)-9*H*-pyrido[2,3-*b*]indole **2** (100 mg, 0.30 mmol, 1.0 equiv, synthesized according our previous report.<sup>6</sup>), Pd<sub>2</sub>(dba)<sub>3</sub> (11 mg, 0.012 mmol, 4 mol%), SPhos (10 mg, 0.024 mmol, 8 mol%) and *t*-BuONa (58 mg, 0.60 mmol, 2.0 equiv) in toluene (3 mL) was stirred in a sealed vessel at a temperature of 120 °C under a nitrogen atmosphere for 3 days, then cooled down to ambient temperature. The reaction was concentrated under reduced pressure, then the residue was purified through column chromatography on silica gel (eluent: petroleum ether/ ethyl acetate = 6:1–4:1) to obtain the desired product as white foamy solid 108 mg in 62% yield. <sup>1</sup>H NMR (500 MHz, DMSO-*d*<sub>6</sub>): δ (ppm) 1.41 (s, 9H), 7.20 (t, *J* = 7.5 Hz, 1H), 7.28 (t, *J* = 7.5 Hz, 1H), 7.32–7.41 (m, 3H), 7.47 (t, *J* = 7.5 Hz, 1H), 7.54 (t, *J* = 7.0 Hz, 1H), 7.61–7.67 (m, 4H), 7.75–7.77 (m, 2H), 7.82 (d, *J* = 1.5 Hz, 1H), 7.87–7.88 (m, 2H), 8.30 (d, *J* = 7.5 Hz, 1H), 8.36–8.39 (m, 2H), 8.52 (d, *J* = 8.5 Hz, 1H), 8.63–8.66 (m, 2H). <sup>13</sup>C NMR (125 MHz, CDCl<sub>3</sub>): δ (ppm) 31.21, 35.39, 109.13, 109.67, 110.38, 110.42, 116.12, 116.36, 119.19, 119.74, 120.02, 120.68, 120.75, 120.79, 120.94, 121.35, 123.05, 123.08, 123.35, 123.80, 124.02, 126.49, 126.95, 128.29, 133.39, 134.30, 135.78, 137.44, 138.84, 140.41, 141.11, 141.23, 142.03, 143.66, 146.48, 152.18, 155.84.

Synthesis of **Ligand(Ph/NHC)**: A solution of CH<sub>3</sub>I (85 mg, 0.60 mmol, 1.2 equiv) and **3(Ph/NHC)** (291 mg, 0.50 mmol, 1.0 equiv) in toluene (7 mL) was stirred in a sealed vessel at a

temperature of 100 °C for 2 days, then cooled down to ambient temperature. The precipitate was filtered off and washed with petroleum ether (7 mL), dried under reduced pressure to afford a gray solid which was used directly for the next step. The gray solid was added to a mixture of MeOH/H<sub>2</sub>O (7 mL/4 mL), then stirred for a few minutes until the solid was entirely dissolved. Then NH<sub>4</sub>PF<sub>6</sub> (109 mg, 0.67 mmol, 1.34 equiv) was added to the solution. The mixture was stirred at room temperature for 3 days, diluted with water, and removed most of the solvent methanol under reduced pressure. The precipitate was collected through filtration, washed with water and petroleum ether. The gray solid was dried under reduced pressure to give the desired product 265 mg in 71% yield. <sup>1</sup>H NMR (500 MHz, DMSO-*d*<sub>6</sub>): δ (ppm) 1.44 (s, 9H), 4.14 (s, 3H), 7.34–7.38 (m, 2H), 7.42 (t, *J* = 7.5 Hz, 1H), 7.47 (t, *J* = 7.0 Hz, 1H), 7.53–7.59 (m, 2H), 7.62–7.67 (m, 3H), 7.74 (t, *J* = 7.5 Hz, 1H), 7.81 (d, *J* = 1.5 Hz, 1H), 7.89 (d, *J* = 8.0 Hz, 1H), 7.92 (t, *J* = 1.5 Hz, 1H), 8.01 (t, *J* = 1.5 Hz, 1H), 8.11 (d, *J* = 8.5 Hz, 1H), 8.15 (t, *J* = 1.5 Hz, 1H), 8.31 (d, *J* = 7.5 Hz, 1H), 8.38–8.41 (m, 2H), 8.54 (d, *J* = 8.0 Hz, 1H), 8.66 (dd, *J* = 7.5, 1.5 Hz, 1H), 10.15 (s, 1H). <sup>13</sup>C NMR (125 MHz, DMSO-*d*<sub>6</sub>): δ (ppm) 30.78, 33.44, 35.36, 108.80, 110.05, 110.37, 113.52, 113.83, 115.74, 116.58, 119.83, 120.39, 120.95, 121.04, 121.43, 121.46, 121.53, 122.22, 122.79, 125.51, 126.83, 126.89, 127.26, 127.39, 129.02, 131.00, 131.77, 134.11, 134.47, 137.97, 139.60, 140.22, 140.57, 143.43, 146.31, 151.40, 155.61. HRMS (ESI): calcd for C<sub>41</sub>H<sub>34</sub>N<sub>5</sub> [M]<sup>+</sup> 596.2809, found 596.2805.

Synthesis of **Pt(Ph/NHC)**: A mixture of **Ligand(Ph/NHC)** (237 mg, 0.32 mmol, 1.0 equiv), Pt(COD)Cl<sub>2</sub> (132 mg, 0.35 mmol, 1.1 equiv) and NaOAc (79 mg, 0.96 mmol, 3.0 equiv) in DME (10 mL) was stirred in a sealed vessel at a temperature of 120 °C under a nitrogen atmosphere for 3 days, then cooled down to ambient temperature. The reaction was concentrated under reduced pressure, then the residue was purified through column chromatography on silica gel (eluent: petroleum ether/CH<sub>2</sub>Cl<sub>2</sub> = 5:1–1:1) to obtain the desired product as a yellow solid 56 mg in 22% yield. <sup>1</sup>H NMR (500 MHz, DMSO-*d*<sub>6</sub>): δ (ppm) 1.56 (s, 9H), 3.63 (s, 3H), 7.34 (t, *J* = 7.0 Hz, 1H), 7.48 (t, *J* = 7.5 Hz, 1H), 7.52–7.57 (m, 4H), 7.72–7.77 (m, 3H), 7.93 (d, *J* = 7.0 Hz, 1H), 8.05 (d, *J* = 8.5 Hz, 1H), 8.12 (d, *J* = 1.5 Hz, 1H), 8.27 (dd, *J* = 7.5, 1.0 Hz, 1H), 8.31–8.34 (m, 3H), 8.48 (d, *J* = 7.5 Hz, 1H), 9.05 (dd, *J* = 7.5, 1.5 Hz, 1H), 9.40 (dd, *J* = 5.5, 1.0 Hz, 1H). <sup>13</sup>C NMR (125 MHz, CDCl<sub>3</sub>): δ (ppm) 31.76, 34.21, 35.18, 105.71, 110.60, 110.67, 111.01, 111.59, 114.51, 115.35, 115.51, 116.01, 117.15, 118.13, 120.04, 120.12, 120.30, 121.15, 122.07, 122.51, 122.72, 124.16, 124.39, 126.52, 126.84, 127.66, 128.70, 132.12, 136.27, 136.32, 137.69, 139.98, 140.41, 142.58, 147.10, 147.77,

150.57, 152.16, 192.27. HRMS (ESI): calcd for  $C_{41}H_{32}N_5Pt$   $[M+H]^+$  789.2300, found 789.2267.

### Synthesis of **Pt(Py/NHC)**:

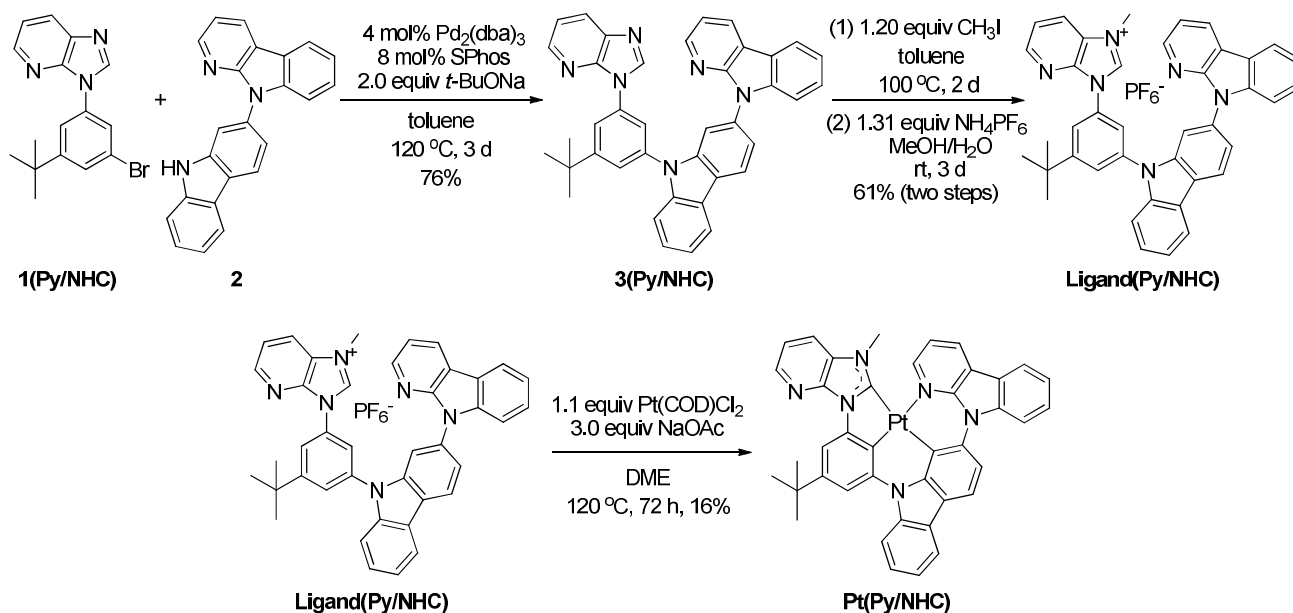

Synthesis of **3(Py/NHC)**: A mixture of

3-(3-bromo-5-(*tert*-butyl)phenyl)-3*H*-imidazo[4,5-*b*]pyridine **1(Ph/NHC)** (50 mg, 0.15 mmol, 1.0 equiv, synthesized according our previous report.<sup>24</sup>), 9-(9*H*-carbazol-2-yl)-9*H*-pyrido[2,3-*b*]indole **2** (50 mg, 0.15 mmol, 1.0 equiv, synthesized according our previous report.<sup>6</sup>),  $\text{Pd}_2(\text{dba})_3$  (6 mg, 0.0060 mmol, 4 mol%), SPhos (5 mg, 0.012 mmol, 8 mol%) and *t*-BuONa (29 mg, 0.30 mmol, 2.0 equiv) in toluene (2 mL) was stirred in a sealed vessel at a temperature of 120 °C under a nitrogen atmosphere for 3 days, then cooled down to ambient temperature. The reaction was concentrated under reduced pressure, then the residue was purified through column chromatography on silica gel (eluent: petroleum ether/ ethyl acetate = 6:1–3:1) to obtain the desired product as white foamy solid 66 mg in 76% yield.  $^1\text{H}$  NMR (500 MHz,  $\text{DMSO}-d_6$ ):  $\delta$  (ppm) 1.42 (s, 9H), 7.28 (dd,  $J$  = 8.0, 4.5 Hz, 1H), 7.32–7.36 (m, 2H), 7.39–7.44 (m, 2H), 7.54–7.57 (m, 1H), 7.60–7.63 (m, 2H), 7.73 (d,  $J$  = 8.0 Hz, 1H), 7.86 (t,  $J$  = 2.0 Hz, 1H), 7.94 (d,  $J$  = 2.0 Hz, 1H), 8.02 (dd,  $J$  = 5.0, 1.5 Hz, 1H), 8.04 (t,  $J$  = 2.0 Hz, 1H), 8.18 (dd,  $J$  = 8.0, 1.5 Hz, 1H), 8.25 (t,  $J$  = 2.0 Hz, 1H), 8.31 (d,  $J$  = 8.0 Hz, 1H), 8.36 (dd,  $J$  = 4.5, 1.5 Hz, 1H), 8.40 (d,  $J$  = 7.5 Hz, 1H), 8.53 (d,  $J$  = 8.0 Hz, 1H), 8.65 (dd,  $J$  = 7.5, 1.5 Hz, 1H), 9.05 (s, 1H).  $^{13}\text{C}$  NMR (125 MHz,  $\text{CDCl}_3$ ):  $\delta$  (ppm) 31.23, 35.37, 109.51, 109.98, 110.50, 116.00, 116.30, 119.01, 119.27, 119.76, 120.57, 120.66, 120.72, 120.87, 121.25, 123.13, 123.20, 123.34, 126.43, 126.92, 128.24, 128.26, 134.22, 135.82, 136.18, 138.35, 140.52, 141.07,

141.18, 142.72, 145.07, 146.47, 152.23, 155.18.

Synthesis of **Ligand(Py/NHC)**: A solution of CH<sub>3</sub>I (44 mg, 0.31 mmol, 1.2 equiv) and **3(Py/NHC)** (152 mg, 0.26 mmol, 1.0 equiv) in toluene (4 mL) was stirred in a sealed vessel at a temperature of 100 °C for 2 days, then cooled down to ambient temperature. The precipitate was filtered off and washed with petroleum ether (4 mL), dried under reduced pressure to afford a gray solid which was used directly for the next step. The gray solid was added to a mixture of MeOH/H<sub>2</sub>O (40 mL/20 mL), then stirred for a few minutes until the solid was entirely dissolved. Then NH<sub>4</sub>PF<sub>6</sub> (56 mg, 0.34 mmol, 1.31 equiv) was added to the solution. The mixture was stirred at room temperature for 3 days, diluted with water, and removed most of the solvent methanol under reduced pressure. The precipitate was collected through filtration, washed with water and petroleum ether. The gray solid was dried under reduced pressure to give the desired product 118 mg in 61% yield. <sup>1</sup>H NMR (500 MHz, DMSO-*d*<sub>6</sub>): δ (ppm) 1.44 (s, 9H), 4.17 (s, 3H), 7.34–7.38 (m, 2H), 7.42–7.48 (m, 2H), 7.57–7.61 (m, 2H), 7.64 (dd, *J* = 8.0, 1.5 Hz, 1H), 7.72 (d, *J* = 8.5 Hz, 1H), 7.77 (dd, *J* = 8.0, 4.5 Hz, 1H), 7.90 (d, *J* = 1.5 Hz, 1H), 8.01 (t, *J* = 1.5 Hz, 1H), 8.13 (dt, *J* = 8.5, 2.0 Hz, 2H), 8.33 (d, *J* = 8.0 Hz, 1H), 8.37 (ddd, *J* = 8.5, 4.5, 1.5 Hz, 2H), 8.42 (d, *J* = 8.0 Hz, 1H), 8.56 (d, *J* = 8.0 Hz, 1H), 8.63 (dd, *J* = 8.0, 1.0 Hz, 1H), 8.67 (dd, *J* = 7.5, 1.5 Hz, 1H), 10.45 (s, 1H). <sup>13</sup>C NMR (125 MHz, DMSO-*d*<sub>6</sub>): δ (ppm) 30.80, 34.01, 35.33, 108.83, 109.95, 110.33, 115.68, 116.55, 120.01, 120.11, 120.34, 120.87, 120.93, 121.02, 121.10, 121.51, 121.54, 122.34, 122.48, 122.83, 123.79, 124.65, 125.18, 126.92, 127.26, 129.00, 133.46, 134.16, 137.37, 139.65, 140.02, 140.39, 142.77, 144.32, 146.33, 148.45, 151.45, 155.10. HRMS (ESI): calcd for C<sub>40</sub>H<sub>33</sub>N<sub>6</sub> [M]<sup>+</sup> 597.2761, found 597.2758.

Synthesis of **Pt(Py/NHC)**: A mixture of **Ligand(Py/NHC)** (149 mg, 0.20 mmol, 1.0 equiv), Pt(COD)Cl<sub>2</sub> (82 mg, 0.22 mmol, 1.1 equiv) and NaOAc (49 mg, 0.60 mmol, 3.0 equiv) in DME (6 mL) was stirred in a sealed vessel at a temperature of 120 °C under a nitrogen atmosphere for 3 days, then cooled down to ambient temperature. The reaction was concentrated under reduced pressure, then the residue was purified through column chromatography on silica gel (eluent: petroleum ether/CH<sub>2</sub>Cl<sub>2</sub> = 5:1–1:1) to obtain the desired product as a yellow solid 26 mg in 16% yield. <sup>1</sup>H NMR (500 MHz, DMSO-*d*<sub>6</sub>): δ (ppm) 1.52 (s, 9H), 3.60 (s, 3H), 7.35 (t, *J* = 7.0 Hz, 1H), 7.42 (t, *J* = 7.0 Hz, 1H), 7.48 (dd, *J* = 8.0, 5.0 Hz, 1H), 7.51–7.58 (m, 2H), 7.71–7.74 (m, 1H), 7.88 (d, *J* = 8.0 Hz, 1H), 8.04 (d, *J* = 8.0 Hz, 1H), 8.13–8.17 (m, 2H), 8.28 (dd, *J* = 8.0, 1.5 Hz, 2H), 8.35 (d, *J* = 8.5

Hz, 1H), 8.45 (d,  $J = 8.0$  Hz, 1H), 8.58 (dd,  $J = 4.5, 1.0$  Hz, 1H), 8.76 (d,  $J = 1.0$  Hz, 1H), 8.99 (d,  $J = 7.5$  Hz, 1H), 9.44 (dd,  $J = 5.5, 1.0$  Hz, 1H).  $^{13}\text{C}$  NMR (125 MHz,  $\text{CDCl}_3$ ):  $\delta$  31.81, 34.11, 35.28, 108.42, 110.67, 110.76, 114.58, 115.11, 115.61, 115.87, 116.49, 117.42, 117.63, 118.15, 120.08, 120.20, 121.10, 122.04, 122.53, 124.48, 126.33, 126.87, 127.56, 128.39, 128.79, 136.46, 137.11, 139.91, 140.22, 142.51, 144.42, 145.83, 147.47, 147.82, 149.32, 152.71, 193.41. HRMS (ESI): calcd for  $\text{C}_{40}\text{H}_{31}\text{N}_6\text{Pt} [\text{M}+\text{H}]^+$  790.2252, found 790.2224.

#### Synthesis of **Pt(NHC-2)**:

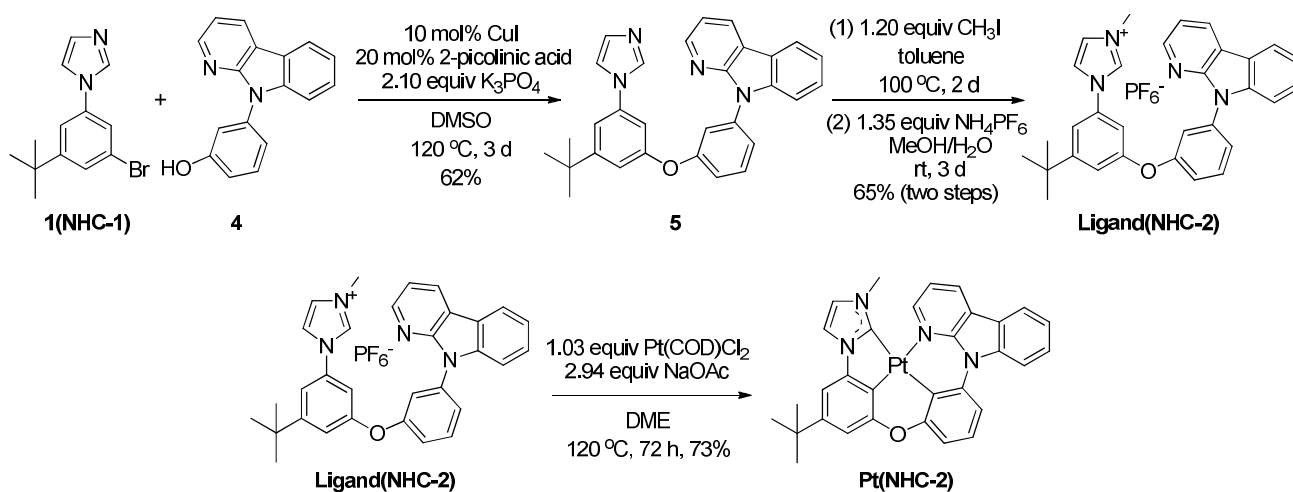

Synthesis of **5**: A mixture of 3-(9H-pyrido[2,3-b]indol-9-yl)phenol **4** (273 mg, 1.05 mmol, 1.0 equiv, synthesized according our previous report.<sup>5,25,26</sup>), 1-(3-bromo-5-(*tert*-butyl)phenyl)-1*H*-imidazole **1(NHC-1)** (279 mg, 1.00 mmol, 1.00 equiv, synthesized according our previous report.<sup>23</sup>), CuI (19 mg, 0.10 mmol, 10 mol%), 2-picolinic acid (25 mg, 0.20 mmol, 20 mol%) and  $\text{K}_3\text{PO}_4$  (446 mg, 2.10 mmol, 2.10 equiv) in DMSO (4 mL) was stirred in a sealed vessel at a temperature of  $120^\circ\text{C}$  under a nitrogen atmosphere for 3 days, the reaction was monitored by TLC until the reaction was completed. The resulting mixture was cooled down to room temperature, and diluted with ethyl acetate. The mixture washed with brine two times. The organic layer was separated and the aqueous layer was extracted with ethyl acetate two times. The combined organic layer was dried over anhydrous sodium sulfate, and concentrated under reduced pressure, then the residue was purified through column chromatography on silica gel (eluent: petroleum ether/ethyl acetate = 6:1–2:1) to obtain the desired product as a brown solid 284 mg in 62% yield.  $^1\text{H}$  NMR (500 MHz,  $\text{CDCl}_3$ ):  $\delta$  (ppm) 1.36 (s, 9H), 7.02 (t,  $J = 2.0$  Hz, 1H), 7.15 (t,

$J = 2.0$  Hz, 1H), 7.17 (ddd,  $J = 8.5, 2.0, 0.5$  Hz, 1H), 7.24–7.25 (m, 3H), 7.32–7.36 (m, 2H), 7.37 (t,  $J = 2.0$  Hz, 1H), 7.45–7.49 (m, 2H), 7.52 (d,  $J = 8.0$  Hz, 1H), 7.62 (t,  $J = 8.0$  Hz, 1H), 8.05 (s, 1H), 8.16 (d,  $J = 7.5$  Hz, 1H), 8.38 (dd,  $J = 7.5, 1.5$  Hz, 1H), 8.44 (dd,  $J = 5.0, 2.0$  Hz, 1H).  $^{13}\text{C}$  NMR (125 MHz,  $\text{CDCl}_3$ ):  $\delta$  (ppm) 31.14, 35.21, 109.44, 110.28, 113.92, 115.75, 116.36, 116.42, 117.70, 117.74, 120.93, 120.97, 121.00, 122.44, 127.01, 128.32, 130.83, 137.71, 139.73, 146.48, 151.75, 155.67, 157.45, 157.57.

**Synthesis of Ligand(NHC-2):** A solution of  $\text{CH}_3\text{I}$  (94 mg, 0.66 mmol, 1.20 equiv) and **5** (252 mg, 0.55 mmol, 1.00 equiv) in toluene (6 mL) was stirred in a sealed vessel at a temperature of 100 °C for 2 days, then cooled down to ambient temperature. The precipitate was filtered off and washed with petroleum ether (6 mL), dried under reduced pressure to afford a gray solid which was used directly for the next step. The gray solid was added to a mixture of MeOH/ $\text{H}_2\text{O}$  (6 mL/4 mL), then stirred for a few minutes until the solid was entirely dissolved. Then  $\text{NH}_4\text{PF}_6$  (120 mg, 0.74 mmol, 1.35 equiv) was added to the solution. The mixture was stirred at room temperature for 3 days, diluted with water, and removed most of the solvent methanol under reduced pressure. The precipitate was collected through filtration, washed with water and petroleum ether. The gray solid was dried under reduced pressure to give the desired product 222 mg in 65% yield.  $^1\text{H}$  NMR (500 MHz,  $\text{DMSO}-d_6$ ):  $\delta$  (ppm) 1.35 (s, 9H), 3.92 (s, 3H), 7.24 (ddd,  $J = 8.5, 2.5, 1.0$  Hz, 1H), 7.35–7.38 (m, 3H), 7.42 (t,  $J = 1.5$  Hz, 1H), 7.47–7.55 (m, 4H), 7.58 (t,  $J = 2.0$  Hz, 1H), 7.70 (t,  $J = 8.0$  Hz, 1H), 7.91 (t,  $J = 1.5$  Hz, 1H), 8.30 (d,  $J = 7.5$  Hz, 1H), 8.32 (t,  $J = 2.0$  Hz, 1H), 8.40 (dd,  $J = 4.5, 1.5$  Hz, 1H), 8.65 (dd,  $J = 8.0, 2.0$  Hz, 1H), 9.76 (s, 1H).  $^{13}\text{C}$  NMR (125 MHz,  $\text{DMSO}-d_6$ ):  $\delta$  (ppm) 30.73, 35.25, 36.11, 110.14, 110.28, 114.65, 115.76, 116.78, 116.89, 117.17, 117.33, 120.48, 121.10, 121.59, 122.36, 124.25, 127.25, 129.05, 131.07, 135.87, 136.24, 137.27, 138.97, 146.30, 151.03, 155.71, 156.70, 156.94. HRMS (ESI): calcd for  $\text{C}_{31}\text{H}_{29}\text{N}_4\text{O}$   $[\text{M}]^+$  473.2336, found 473.2332.

**Synthesis of Pt(NHC-2):** A mixture of **Ligand(NHC-2)** (202 mg, 0.327 mmol, 1.00 equiv),  $\text{Pt}(\text{COD})\text{Cl}_2$  (126 mg, 0.337 mmol, 1.03 equiv) and NaOAc (79 mg, 0.963 mmol, 2.94 equiv) in DME (6 mL) was stirred in a sealed vessel at a temperature of 120 °C under a nitrogen atmosphere for 3 days, then cooled down to ambient temperature. The reaction was concentrated under reduced pressure, then the residue was purified through column chromatography on silica gel (eluent: petroleum ether/ $\text{CH}_2\text{Cl}_2 = 5:1-1:1$ ) to obtain the desired product as a yellow solid 160 mg in 73% yield.  $^1\text{H}$  NMR (500 MHz,  $\text{DMSO}-d_6$ ):  $\delta$  (ppm) 1.37 (s, 9H), 3.46 (s, 3H), 6.86 (d,  $J = 2.0$  Hz, 1H),

7.06 (dd,  $J = 8.0, 1.0$  Hz, 1H), 7.15 (t,  $J = 8.0$  Hz, 1H), 7.26 (d,  $J = 1.5$  Hz, 1H), 7.35 (d,  $J = 2.0$  Hz, 1H), 7.44–7.50 (m, 3H), 7.64–7.68 (m, 1H), 8.08 (d,  $J = 2.0$  Hz, 1H), 8.12 (d,  $J = 8.5$  Hz, 1H), 8.39 (d,  $J = 7.0$  Hz, 1H), 8.93 (dd,  $J = 7.5, 1.5$  Hz, 1H), 9.24 (dd,  $J = 5.5, 1.5$  Hz, 1H).  $^{13}\text{C}$  NMR (125 MHz,  $\text{CDCl}_3$ ):  $\delta$  (ppm) 31.59, 34.71, 37.30, 103.07, 108.94, 110.37, 110.75, 113.68, 114.85, 115.74, 116.33, 119.88, 121.10, 121.30, 121.99, 122.60, 124.51, 126.56, 127.50, 128.38, 138.71, 140.46, 148.37, 148.58, 149.09, 151.81, 151.88, 156.40, 181.55. HRMS (ESI): calcd for  $\text{C}_{31}\text{H}_{27}\text{N}_4\text{OPt}$   $[\text{M}+\text{H}]^+$  666.1827, found 666.1820.

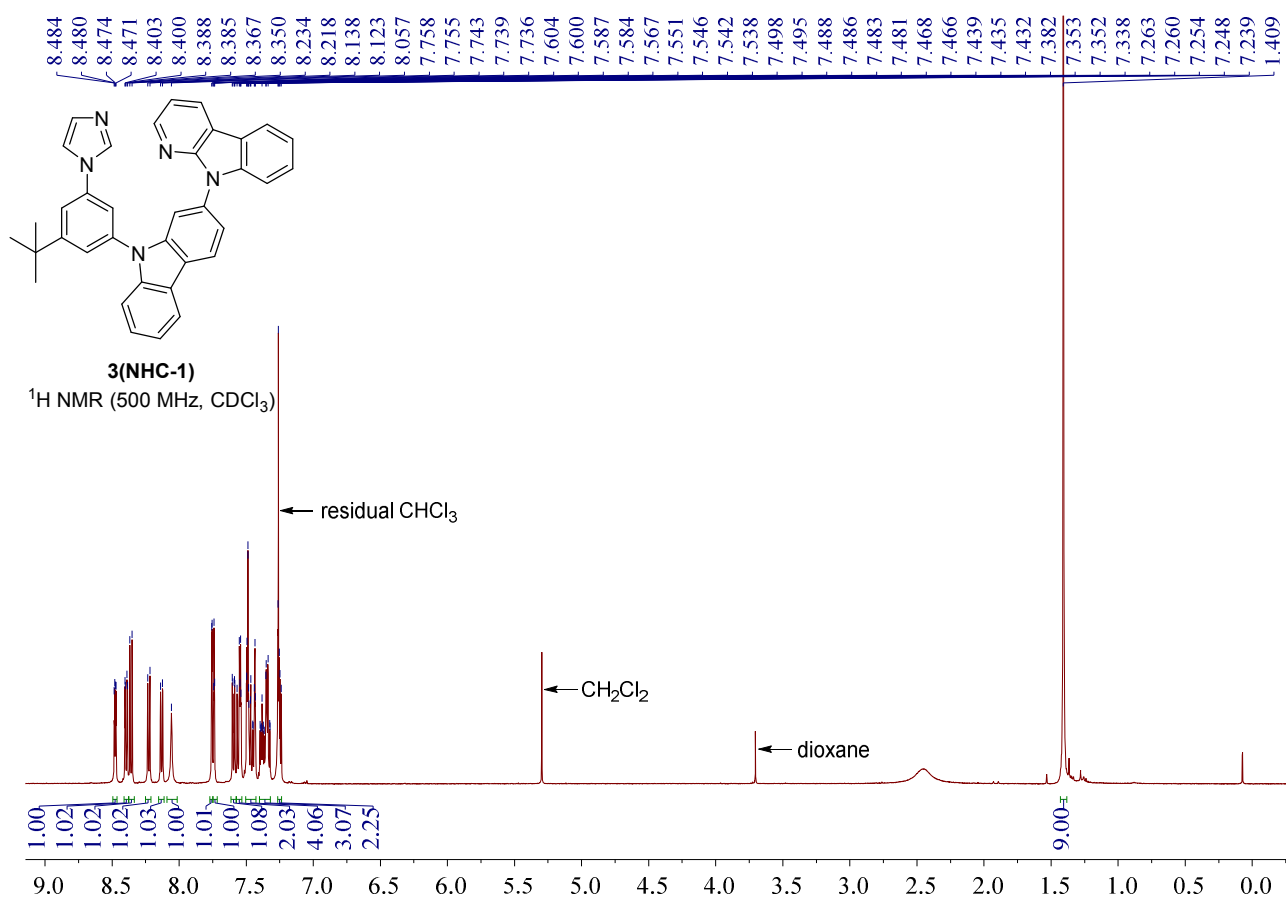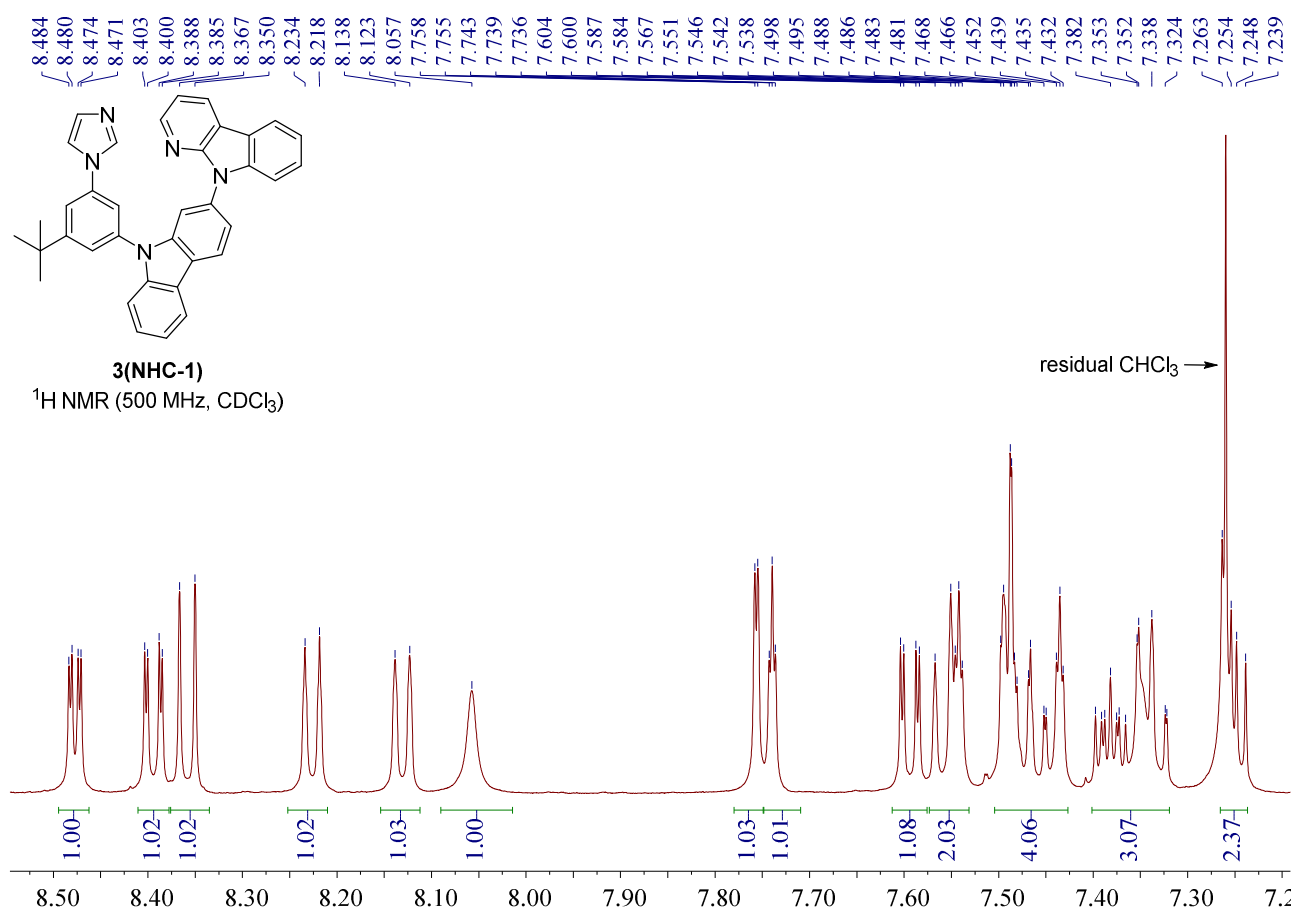

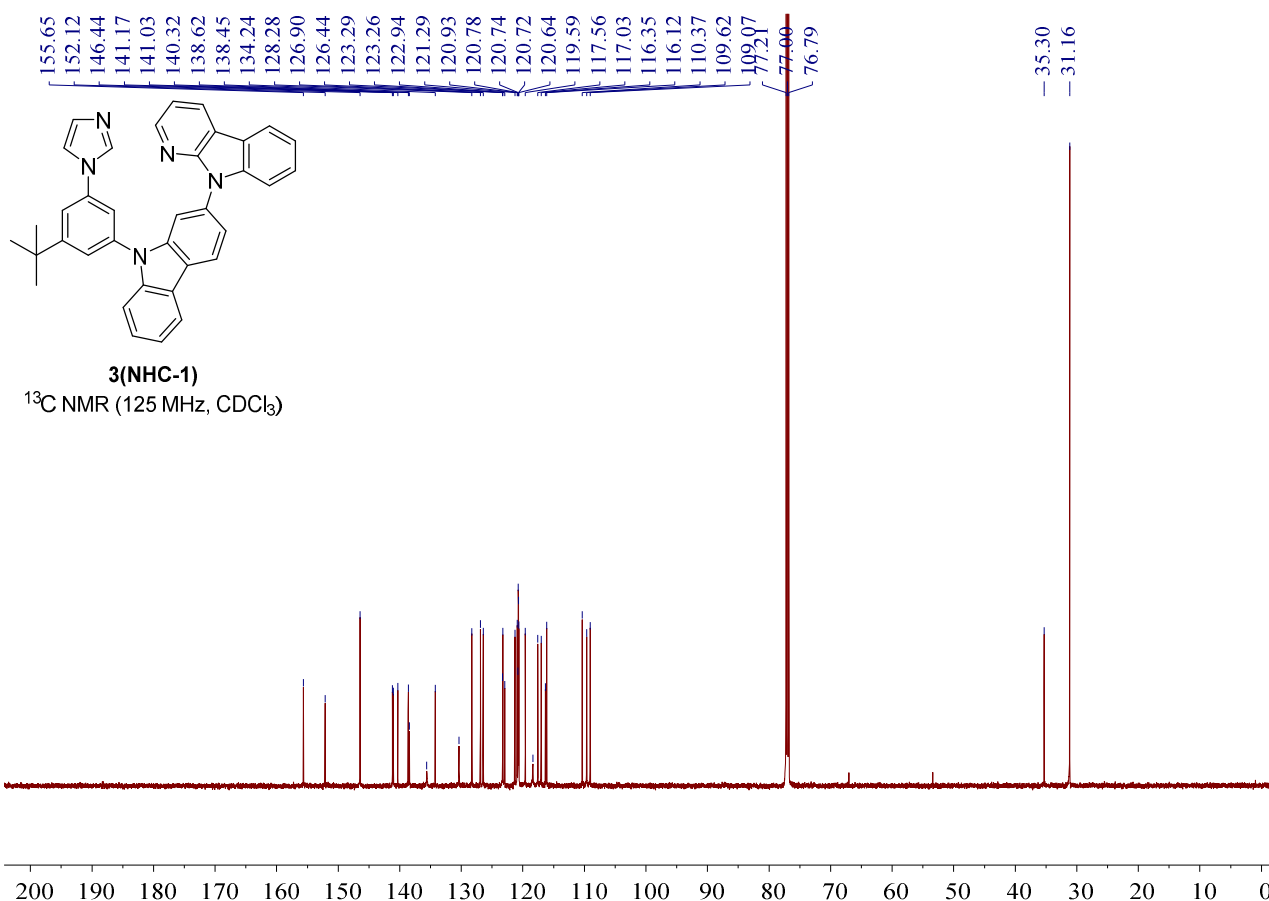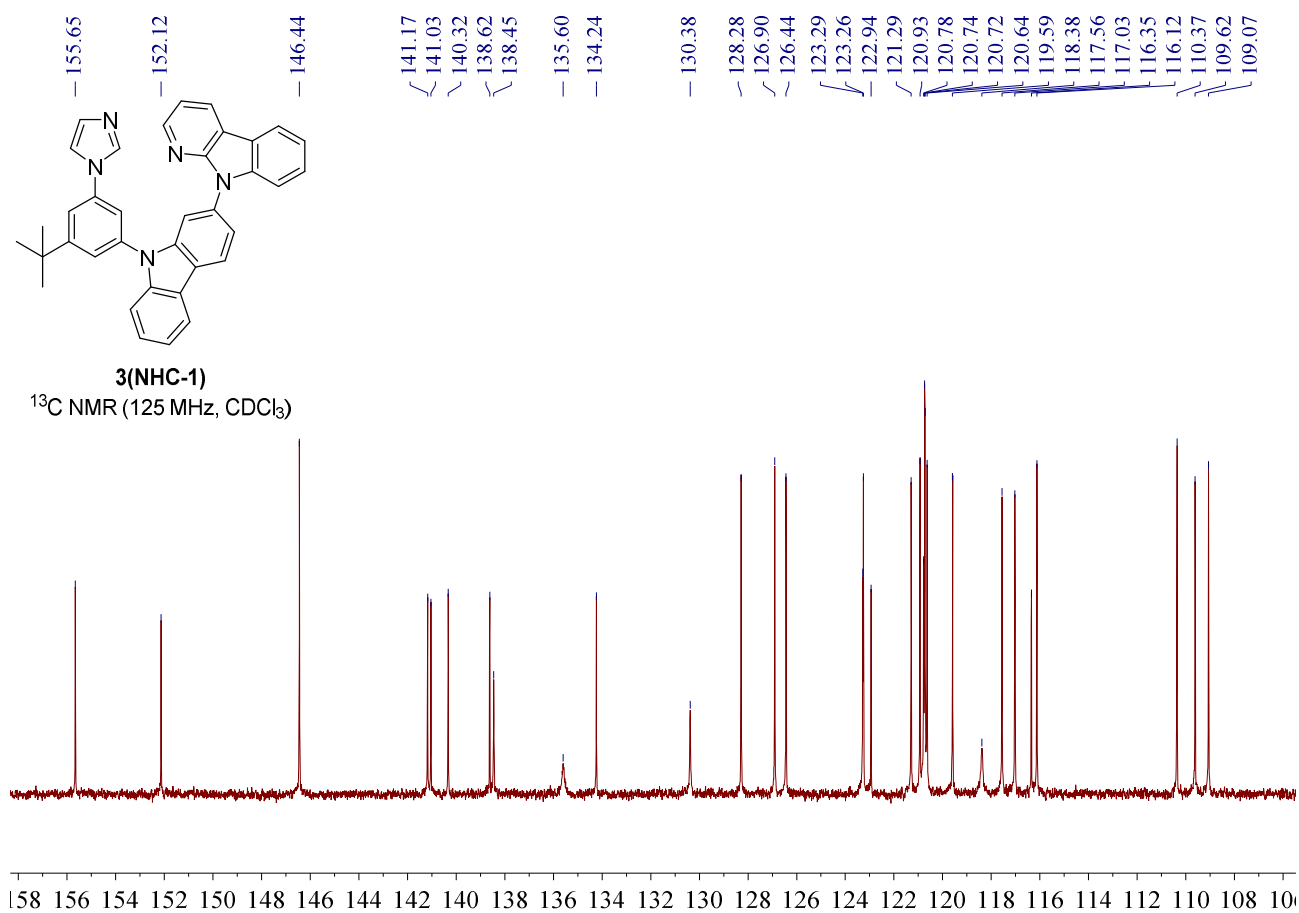

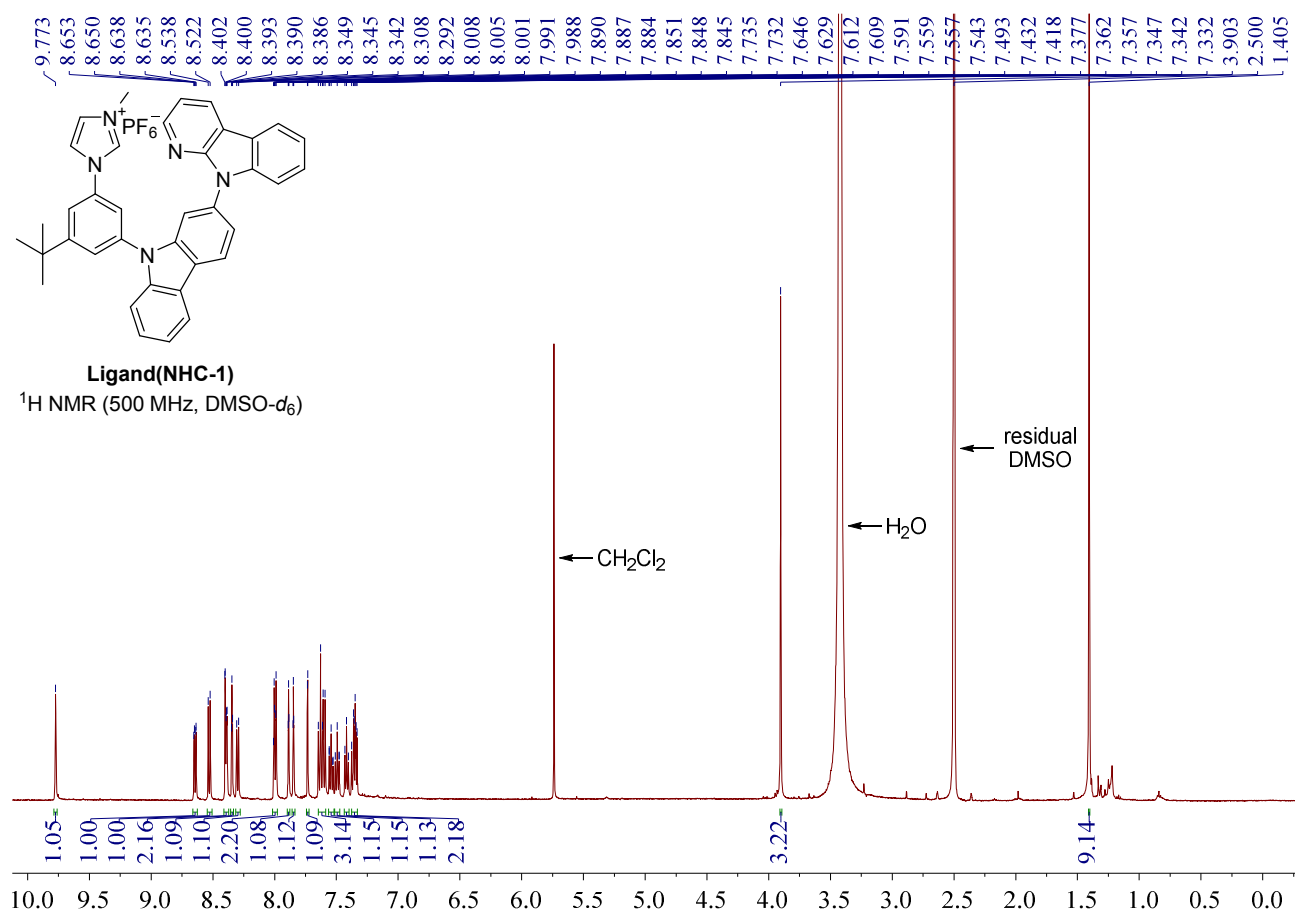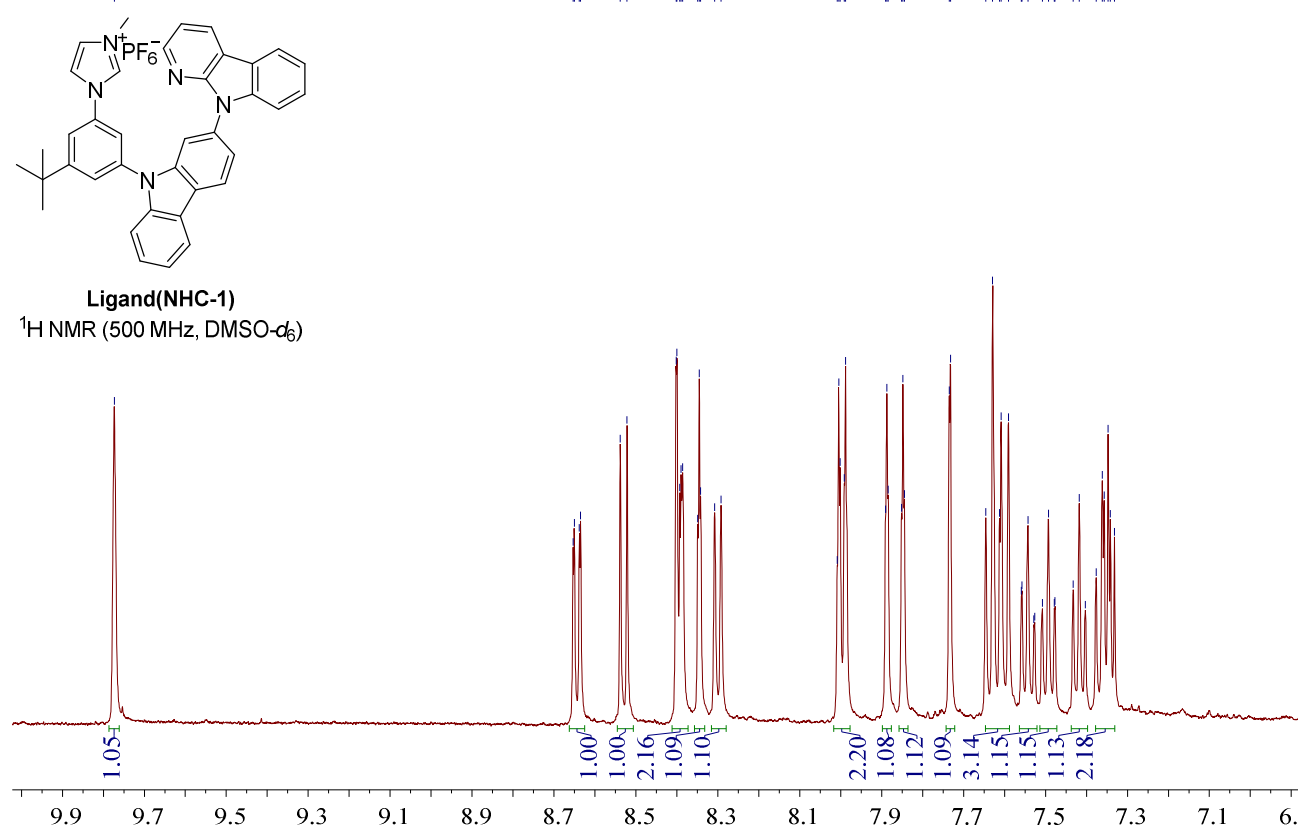

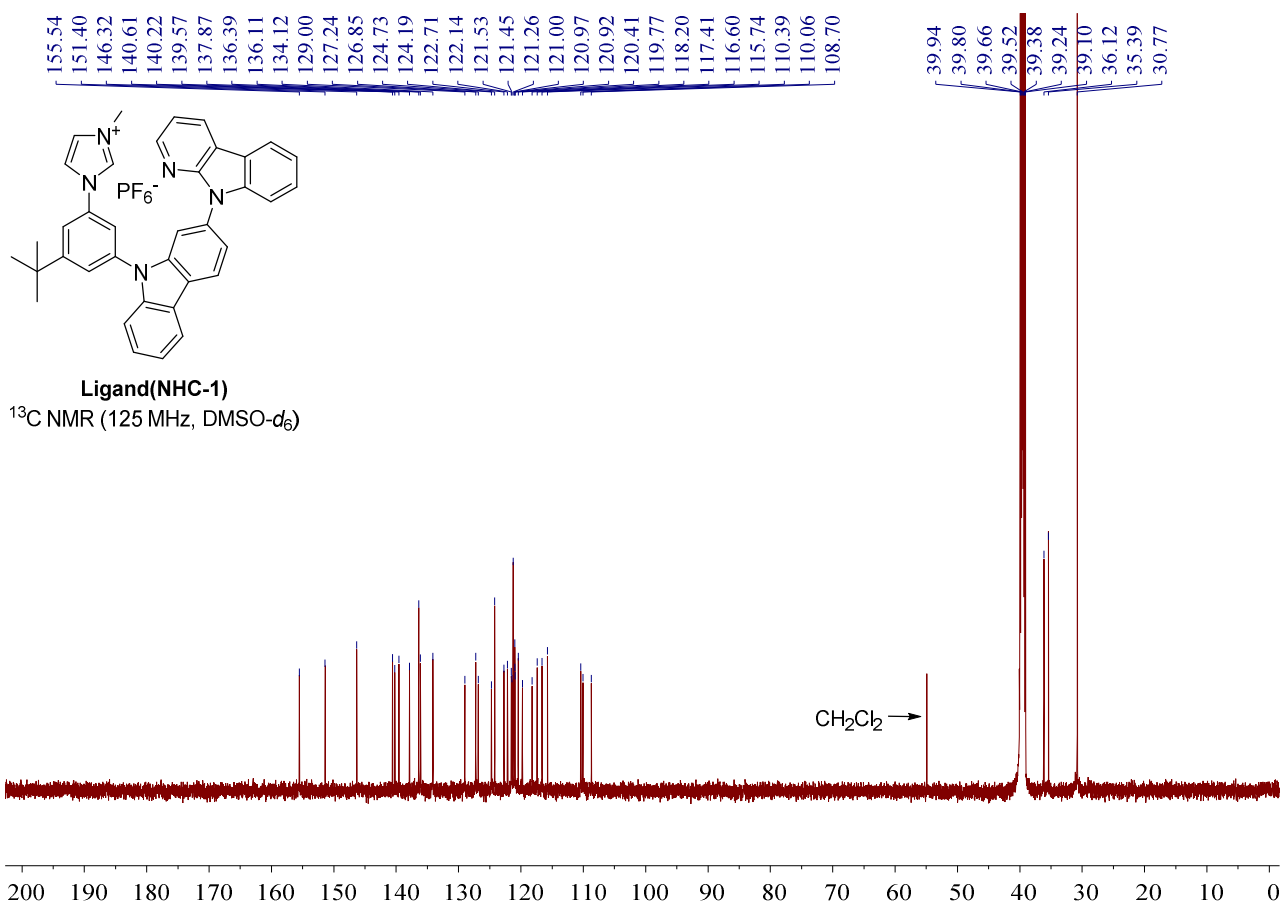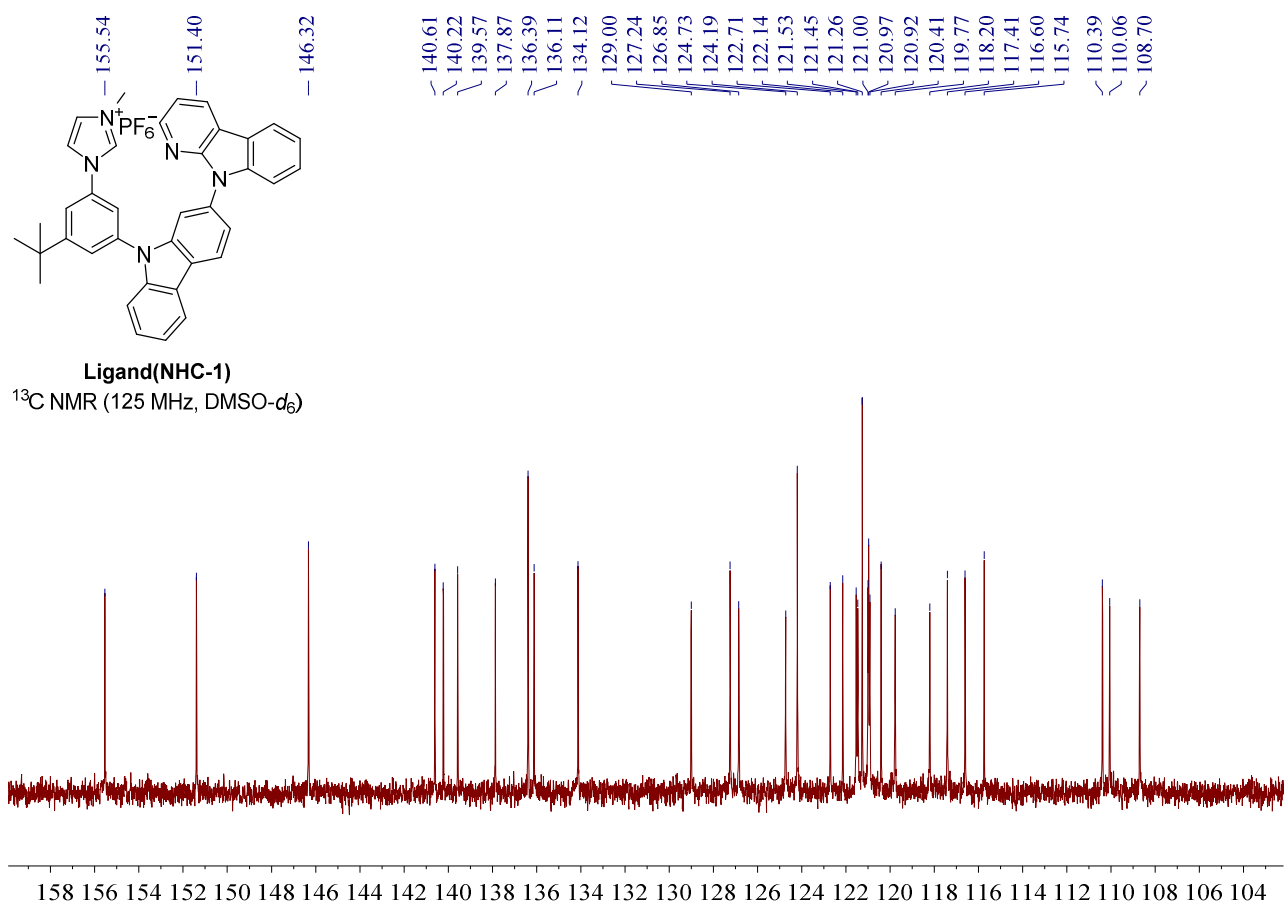

ligand\_1 #343-381 RT: 0.71-0.77 AV: 5 NL: 4.13E7  
T: FTMS + p ESI Full ms [100.0000-1000.0000]

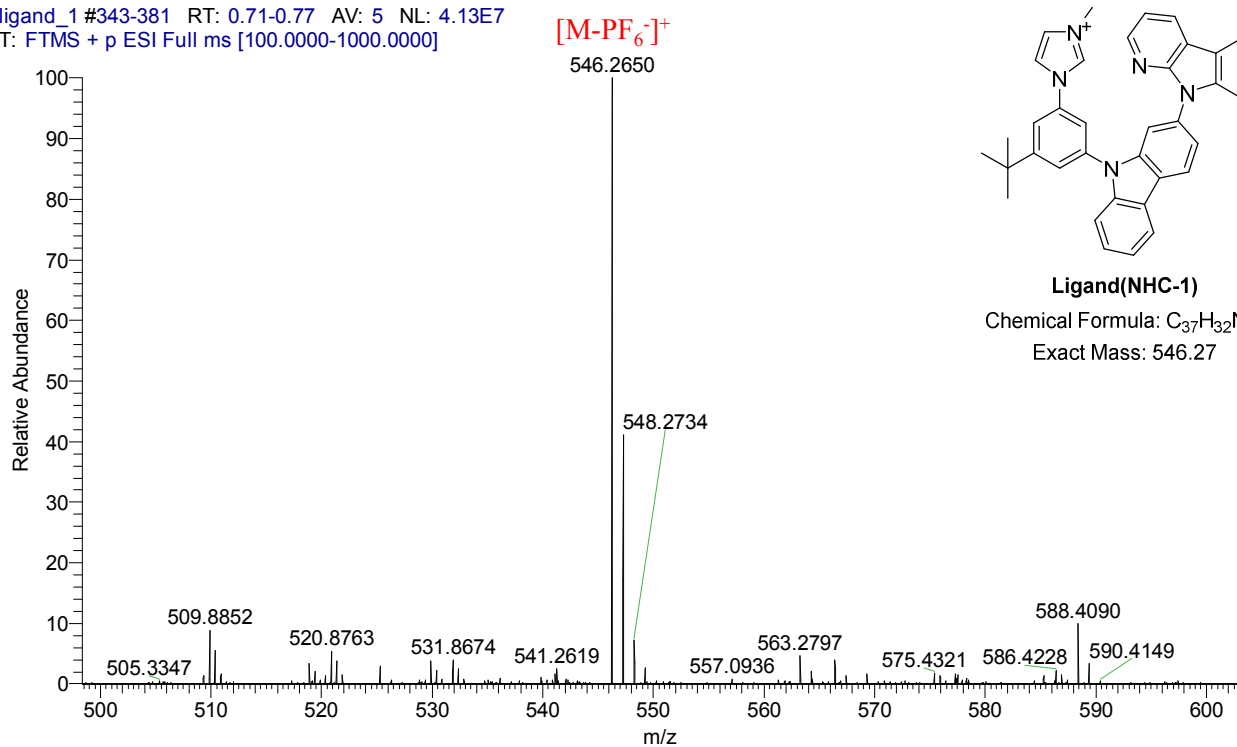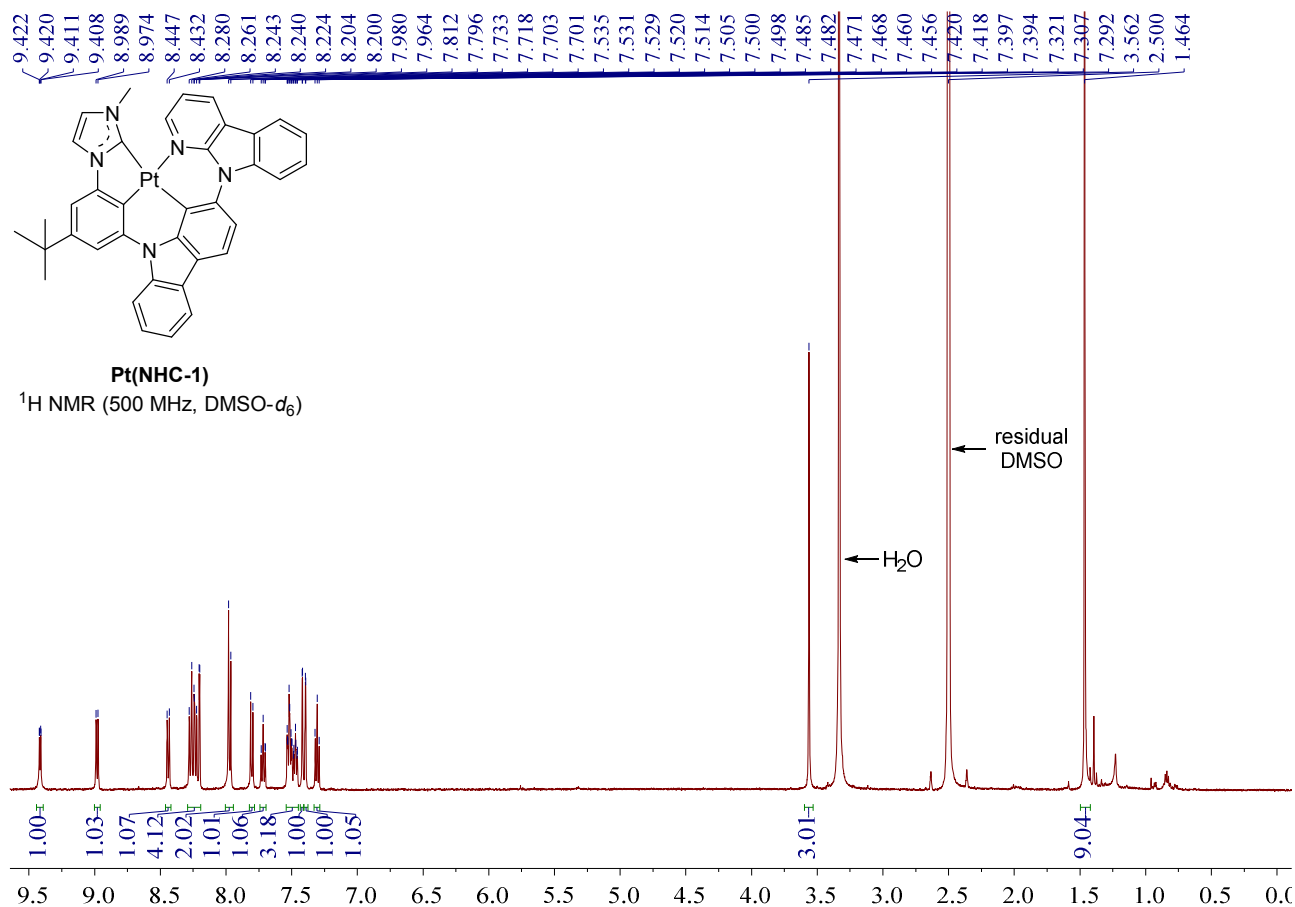

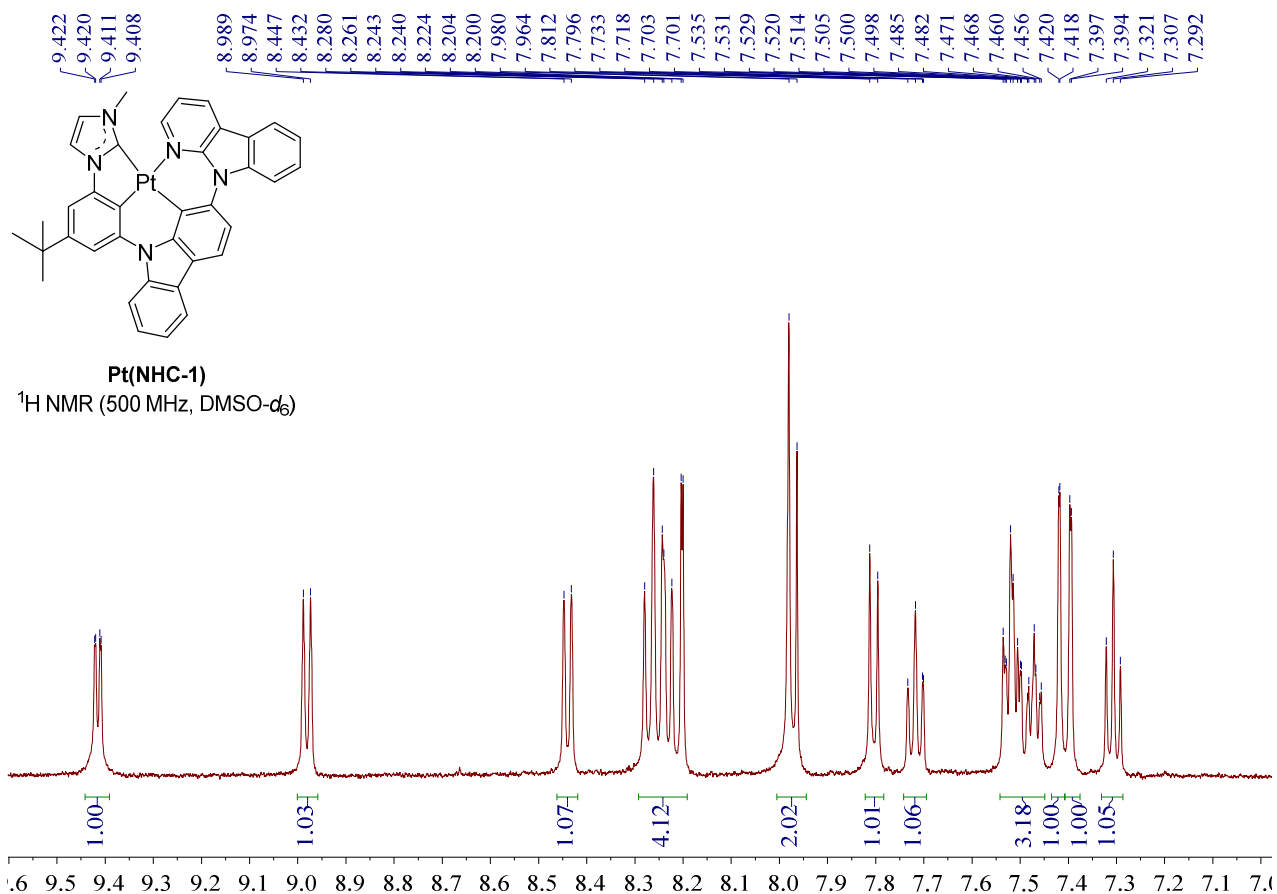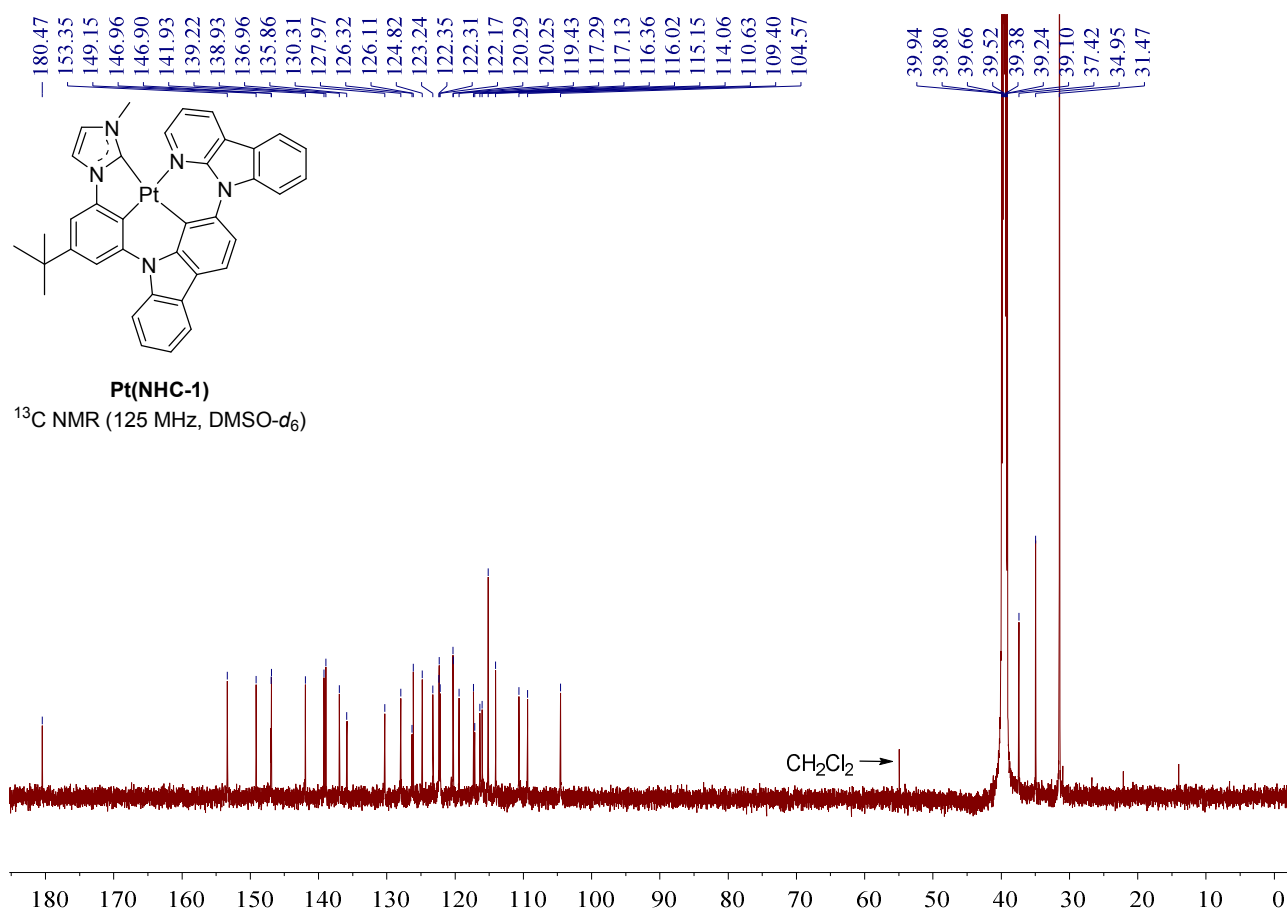

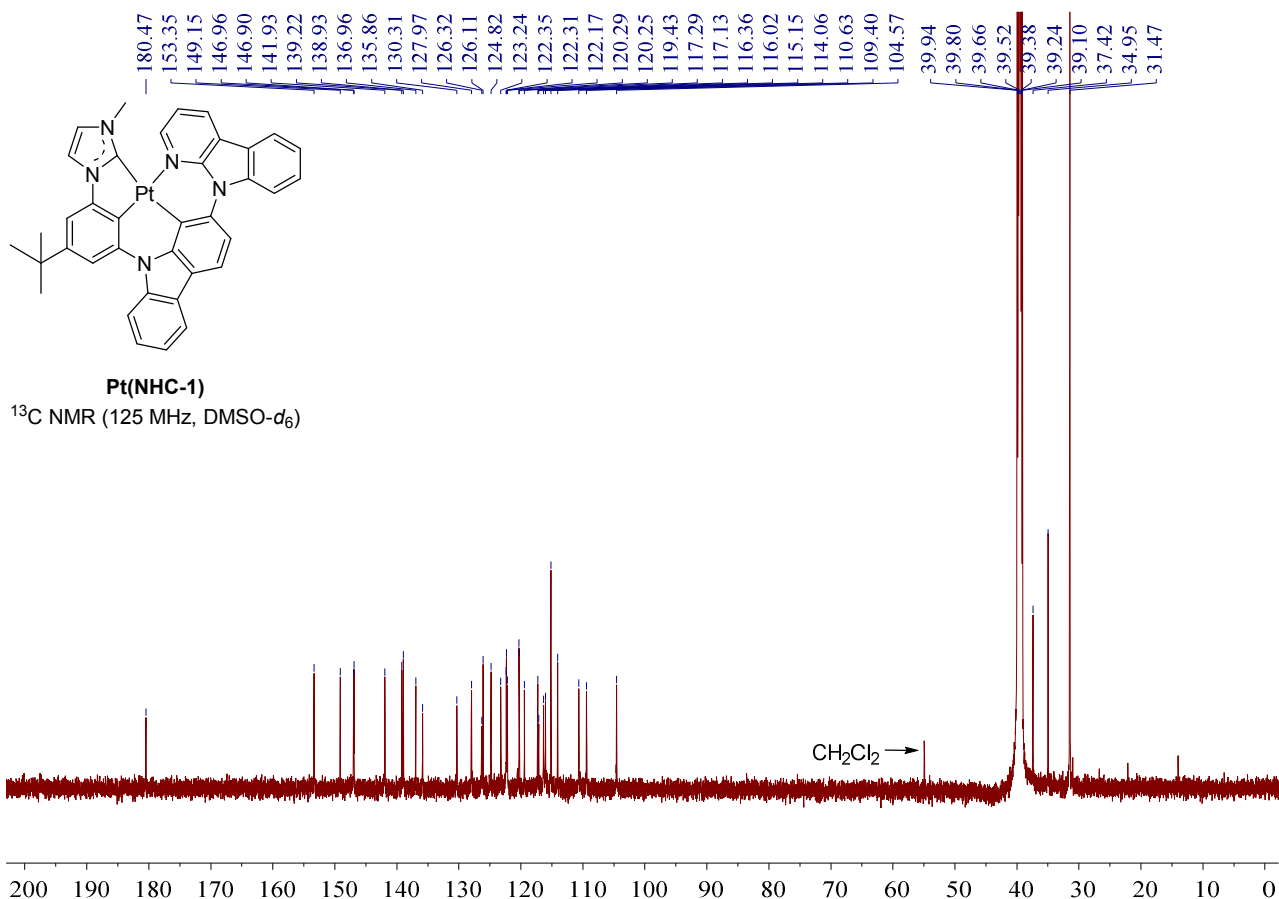

ptls\_1 #1402-1476 RT: 2.81-2.94 AV: 8 NL: 1.85E6  
 T: FTMS + p ESI Full ms [100.0000-1000.0000]

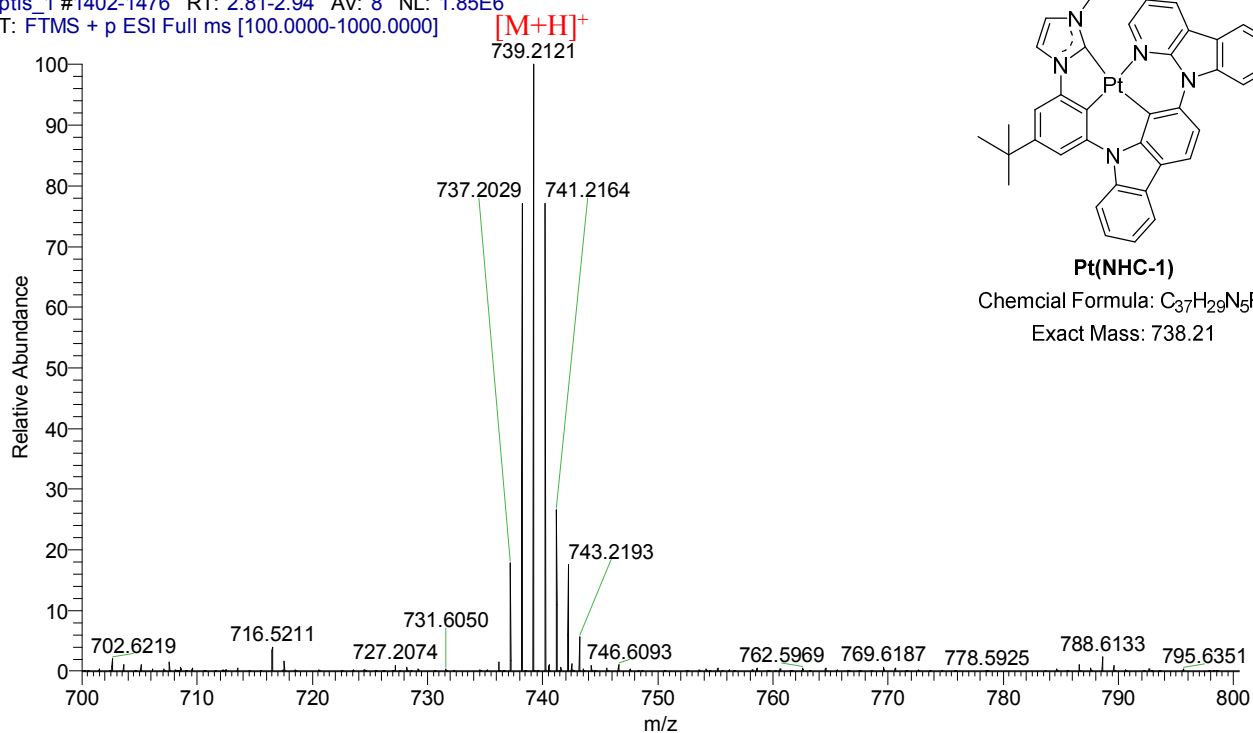

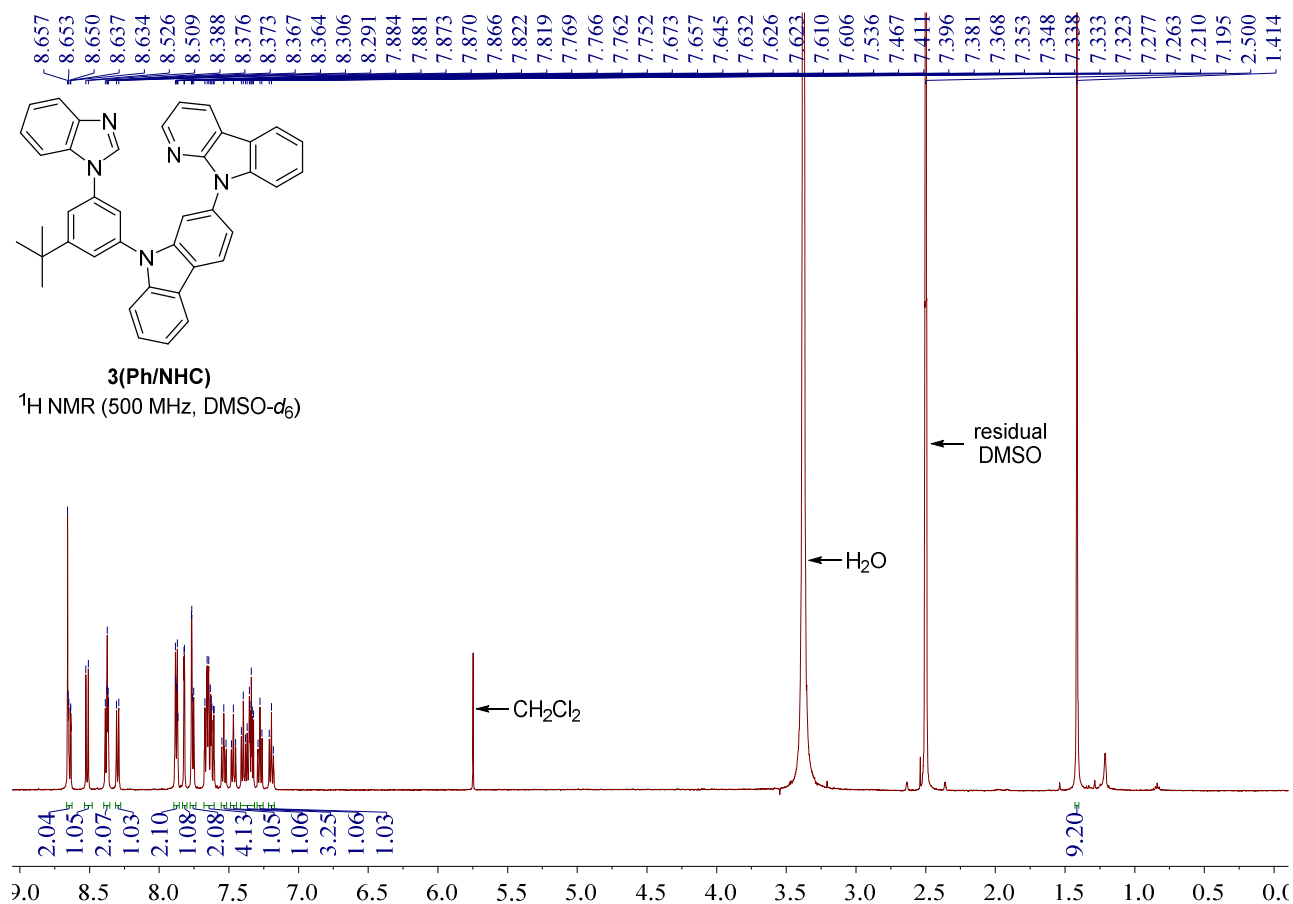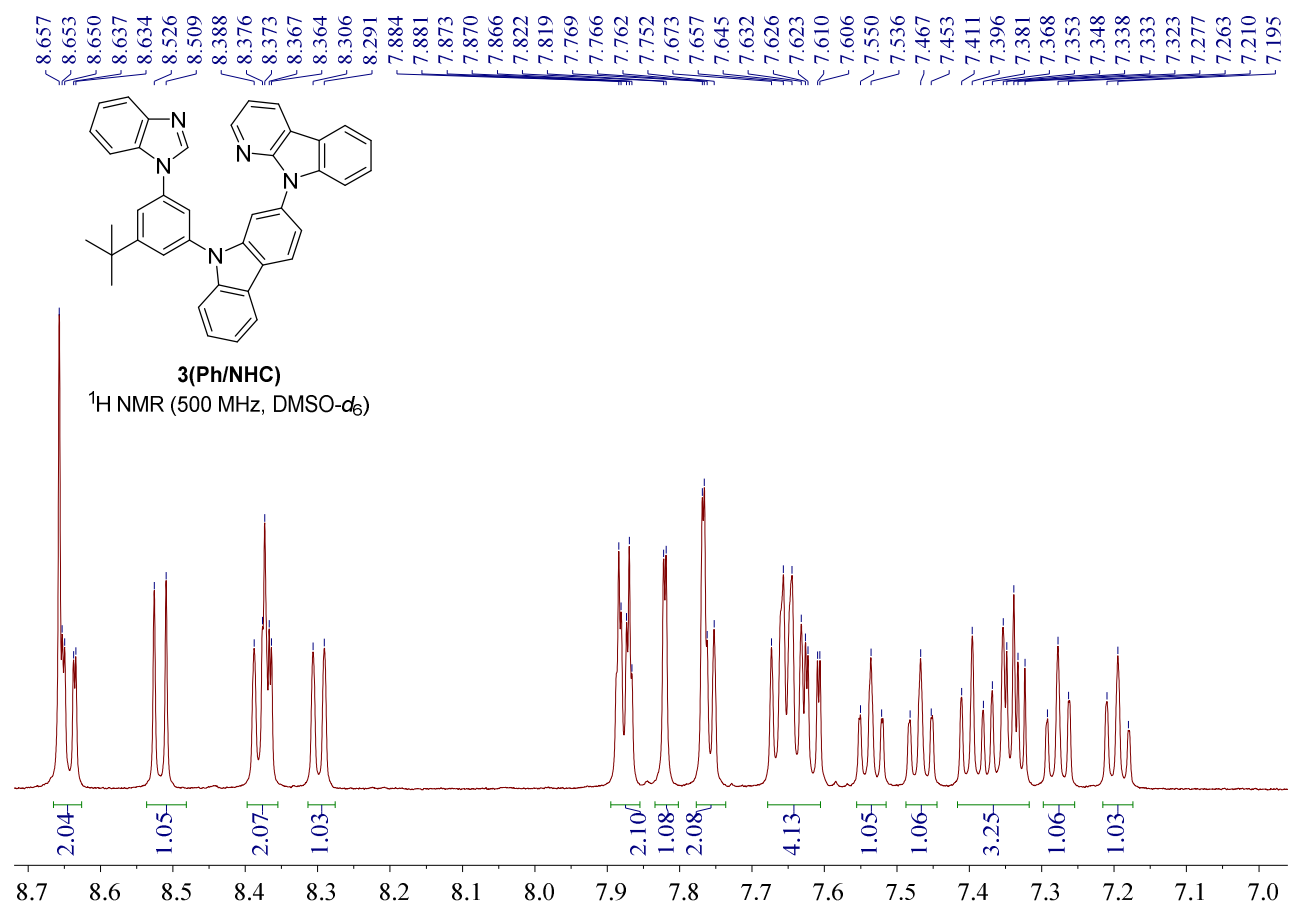

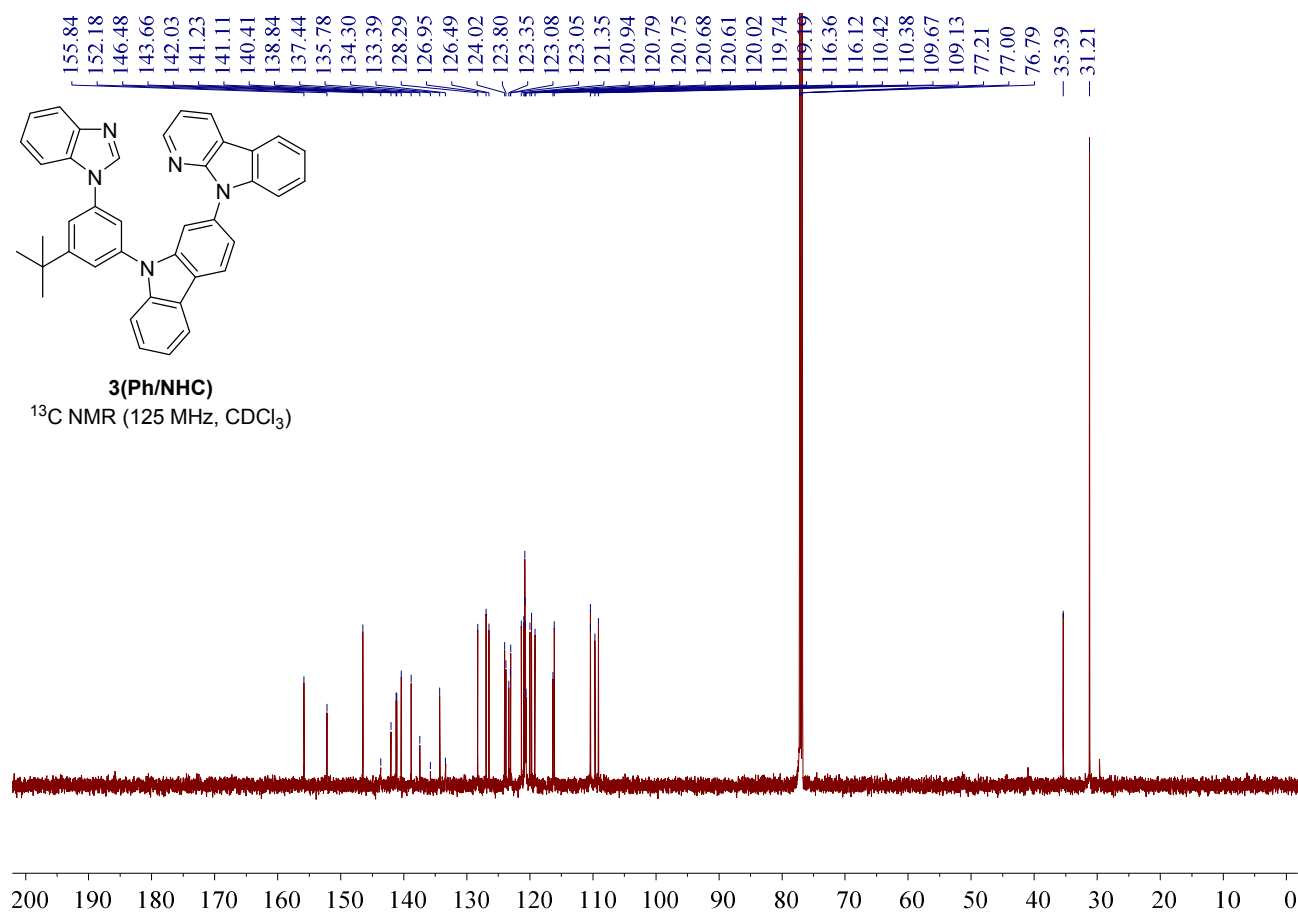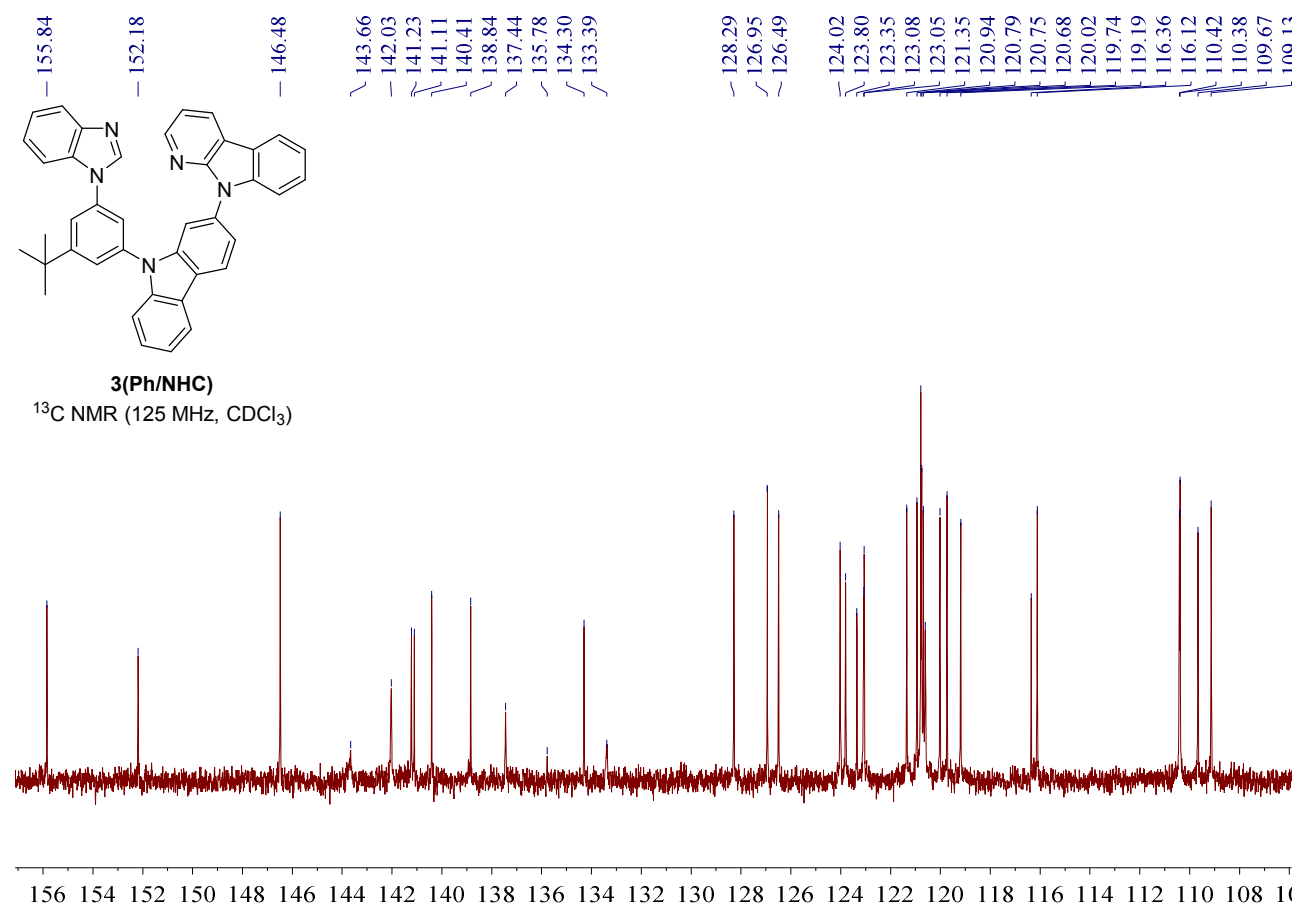

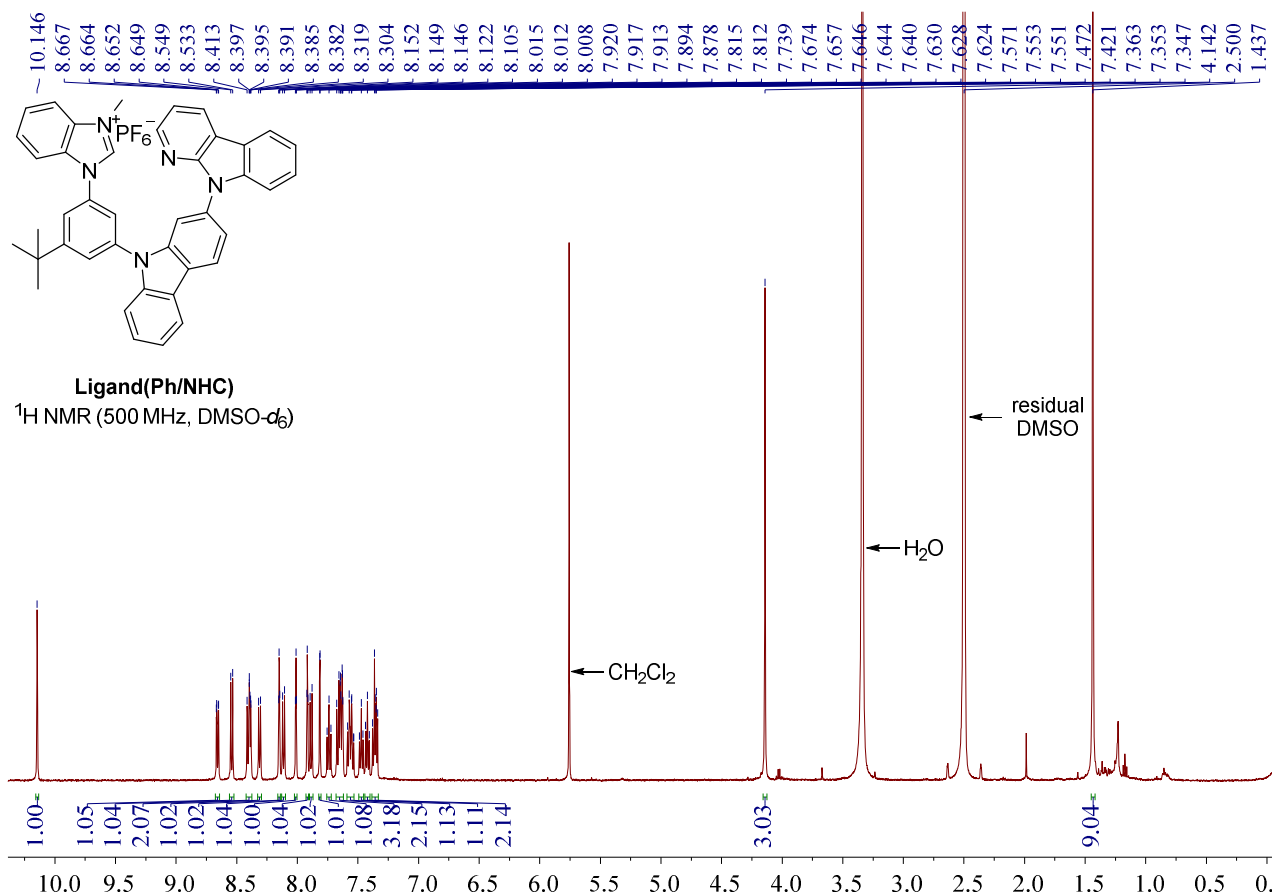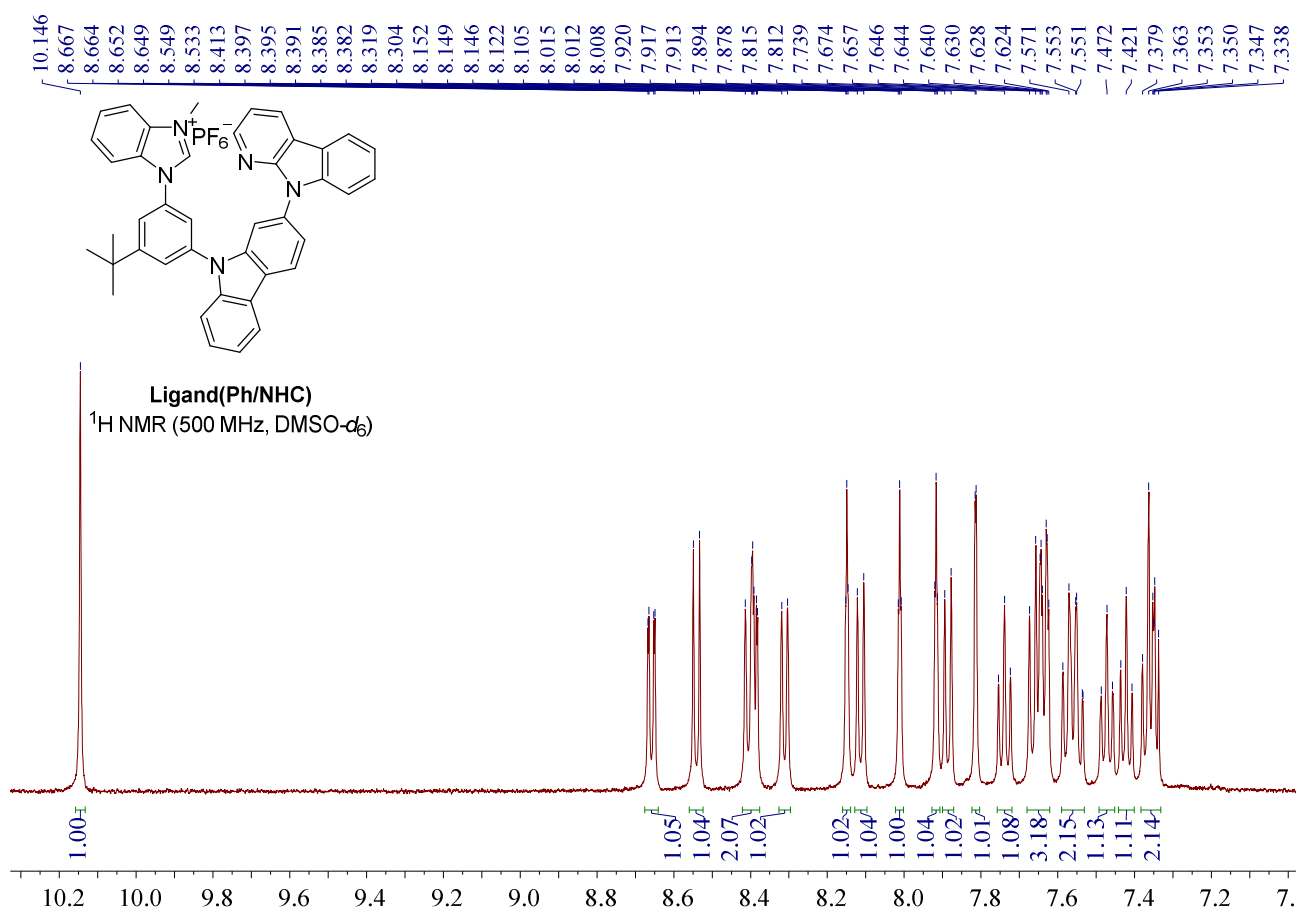

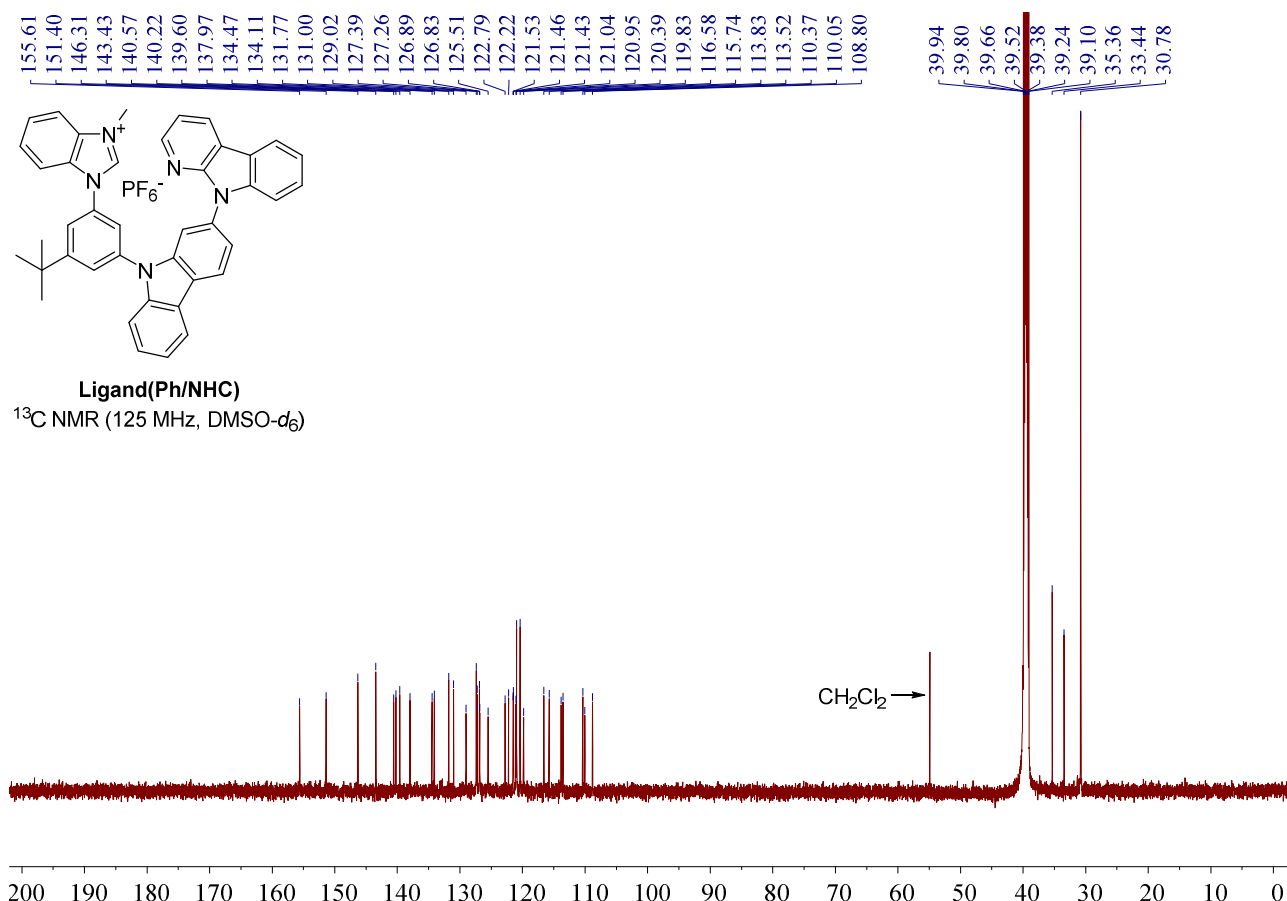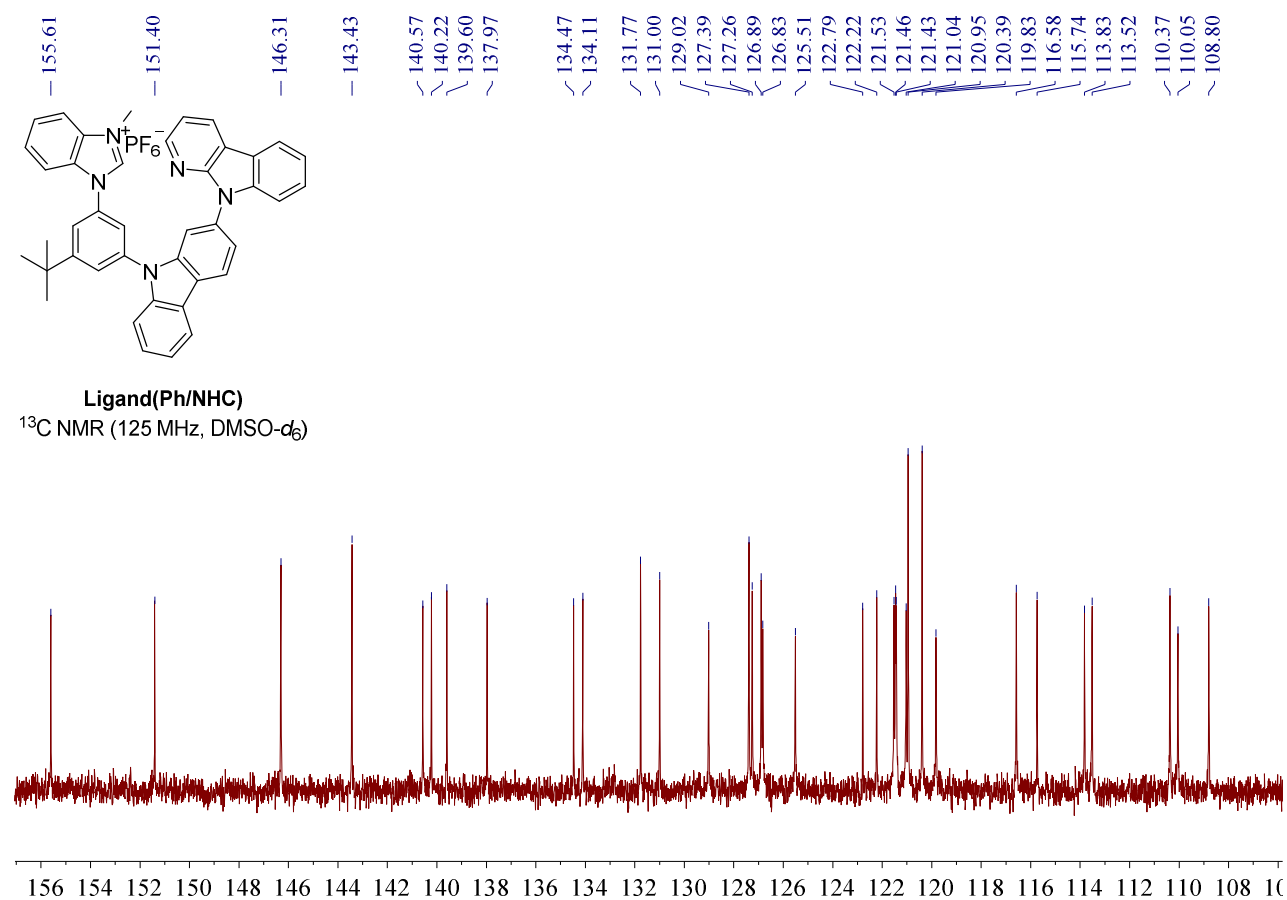

ligand\_2 #343-374 RT: 0.71-0.75 AV: 4 NL: 1.73E8  
T: FTMS + p ESI Full ms [100.0000-1000.0000]

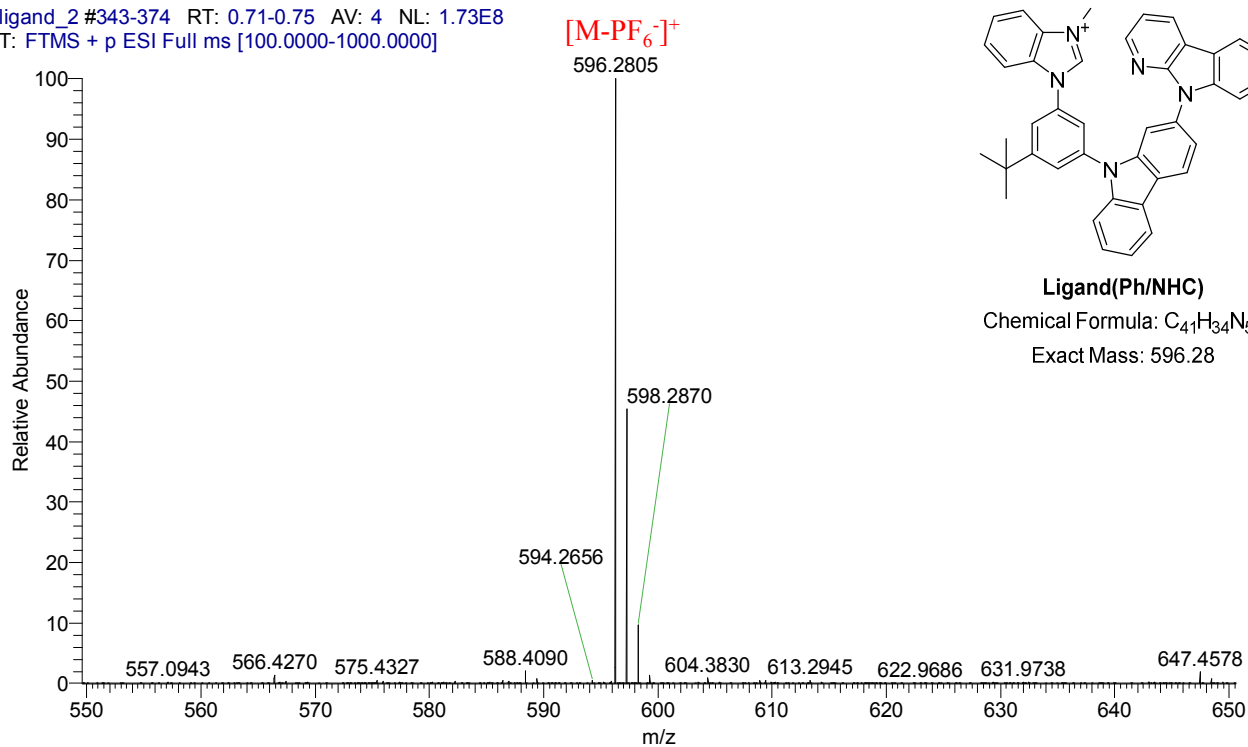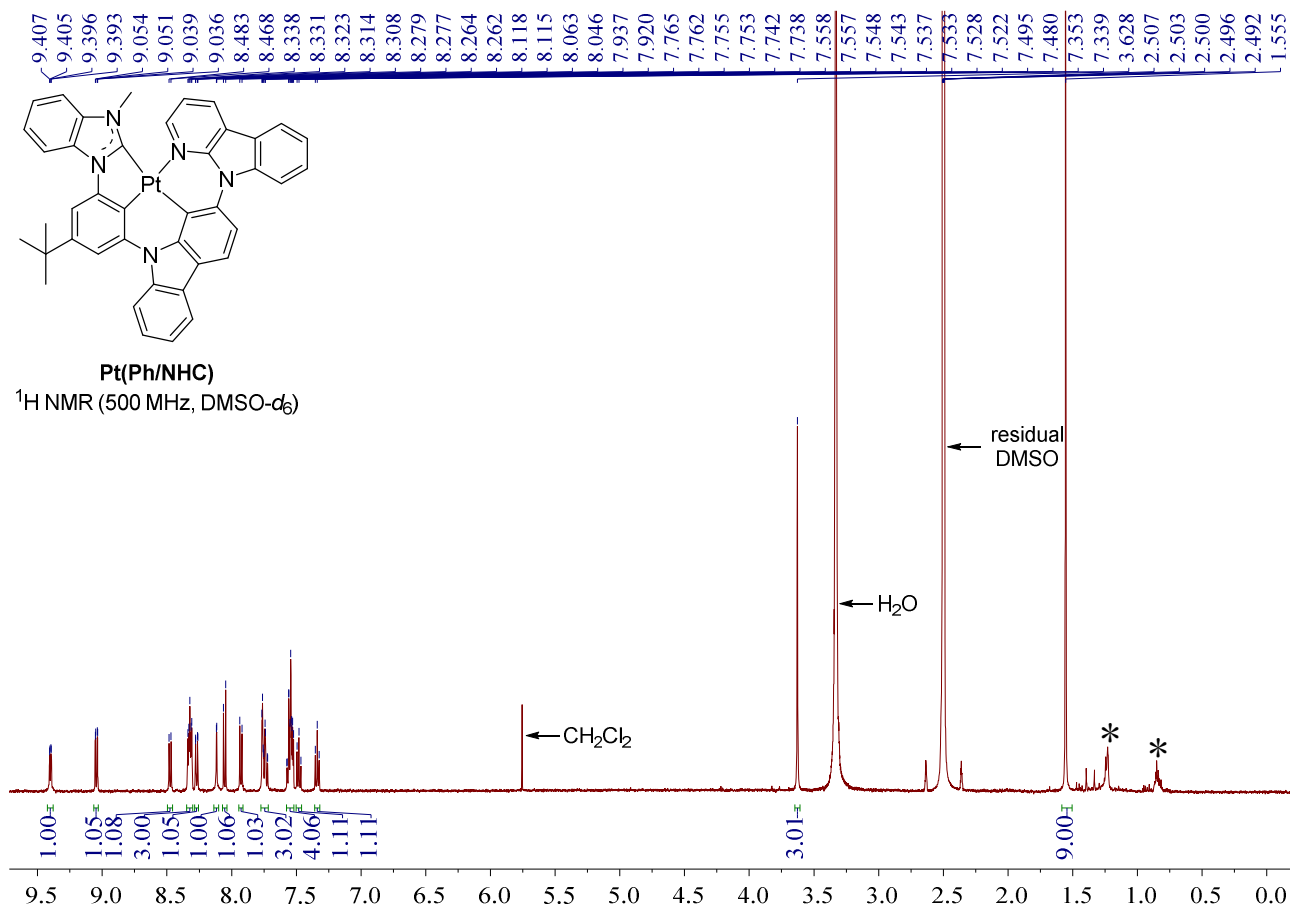

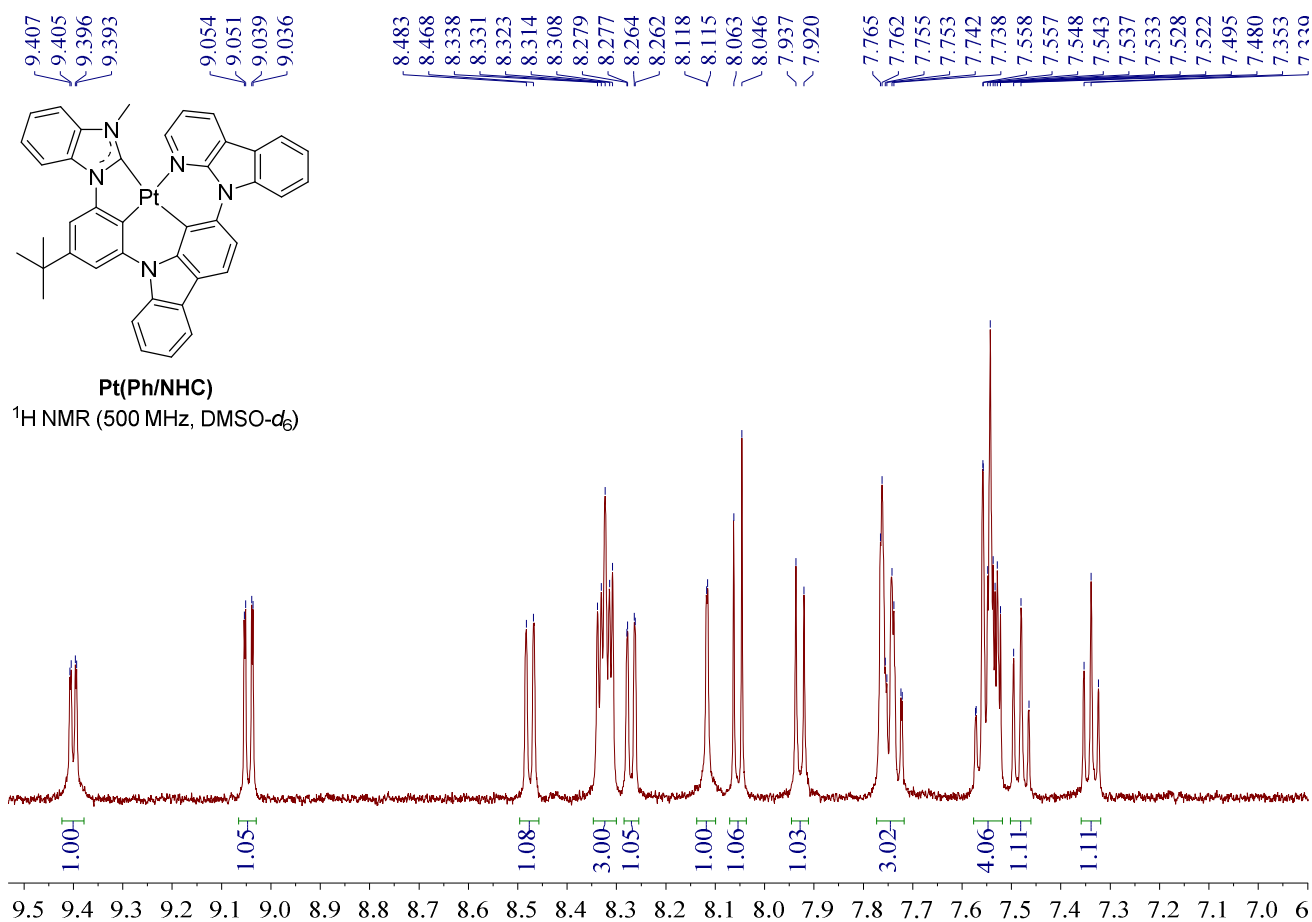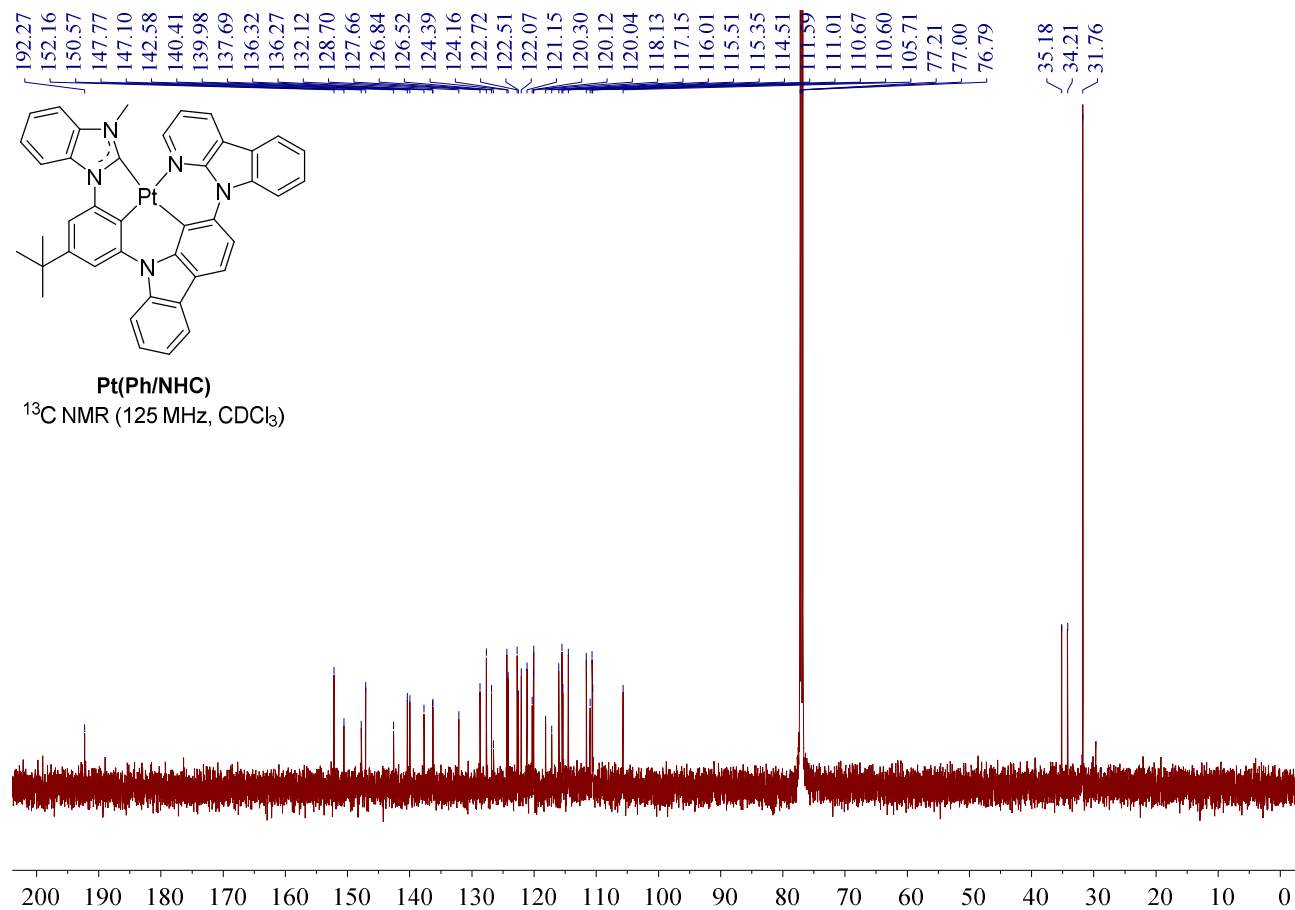

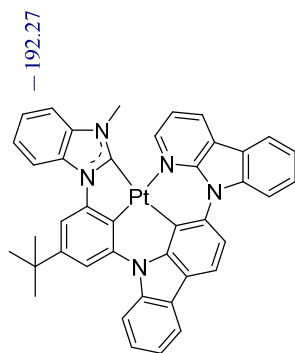

**Pt(Ph/NHC)**

$^{13}\text{C}$  NMR (125 MHz,  $\text{CDCl}_3$ )

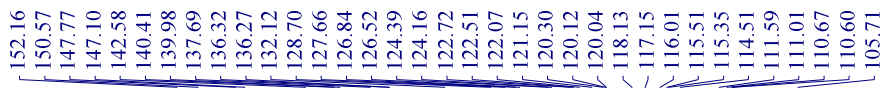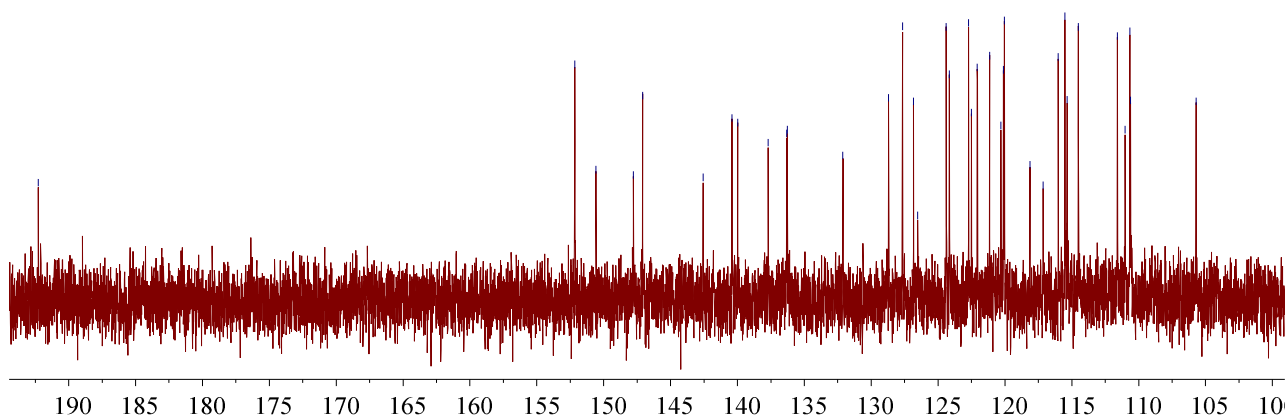

PTLS2\_2 #610-634 RT: 1.12-1.16 AV: 3 NL: 2.06E7  
T: FTMS + p ESI Full ms [100.0000-1500.0000]

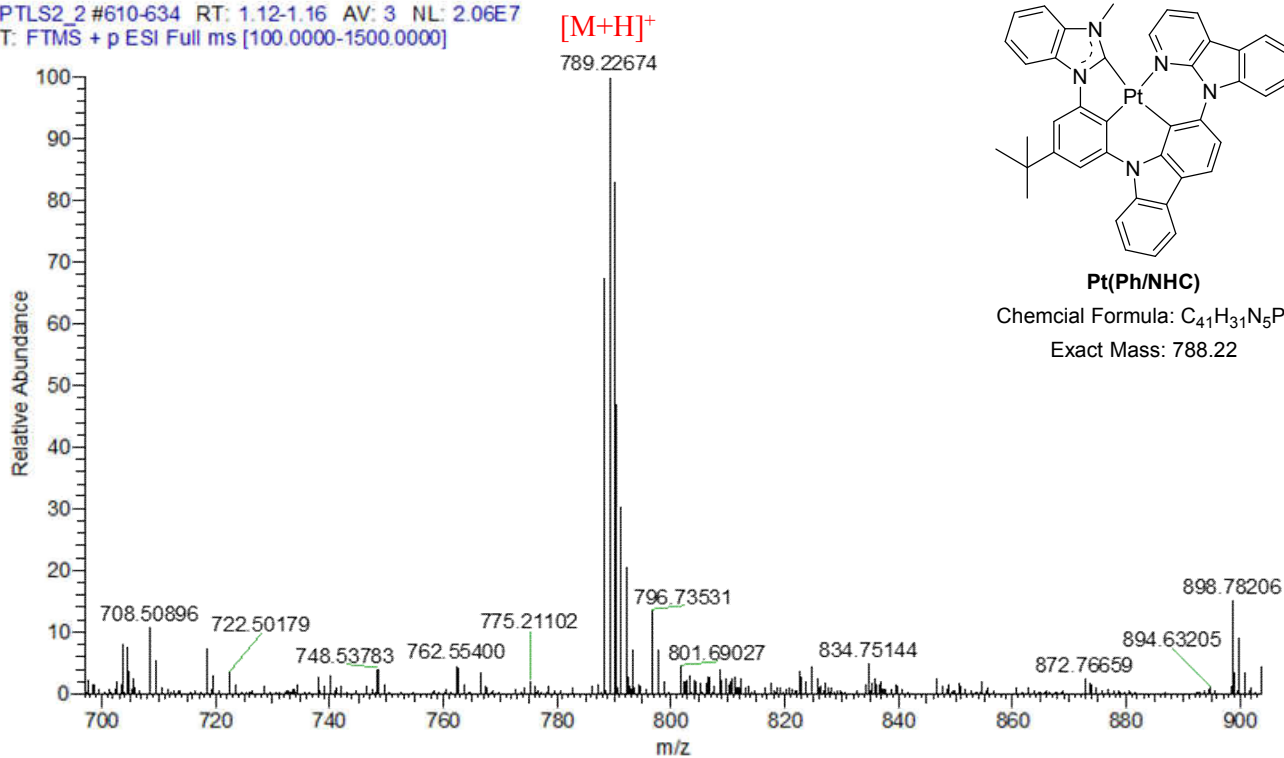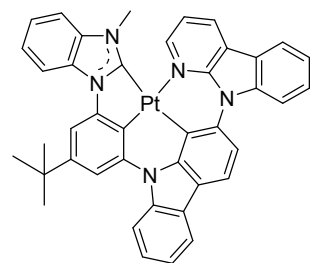

**Pt(Ph/NHC)**

Chemical Formula:  $\text{C}_{41}\text{H}_{31}\text{N}_5\text{Pt}$

Exact Mass: 788.22

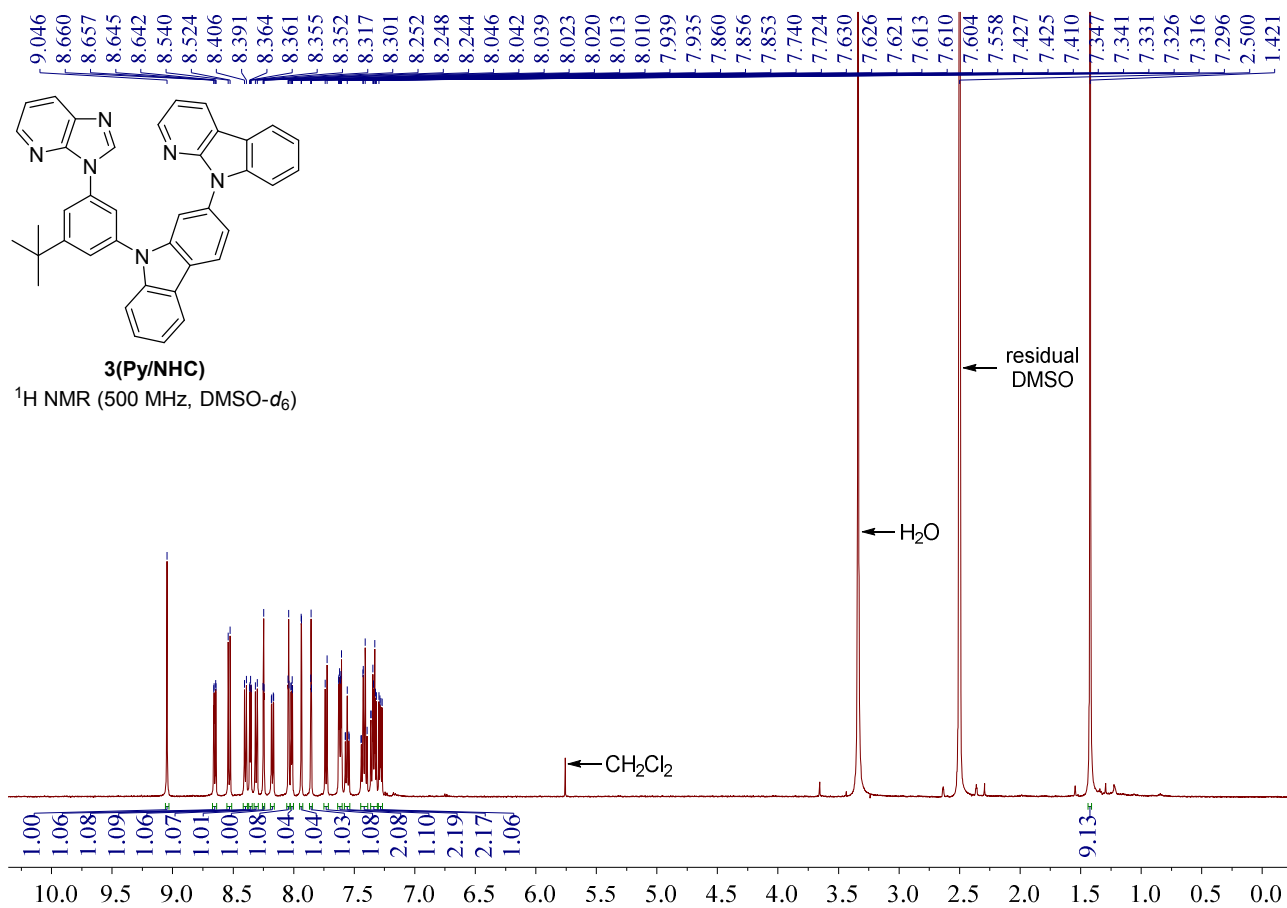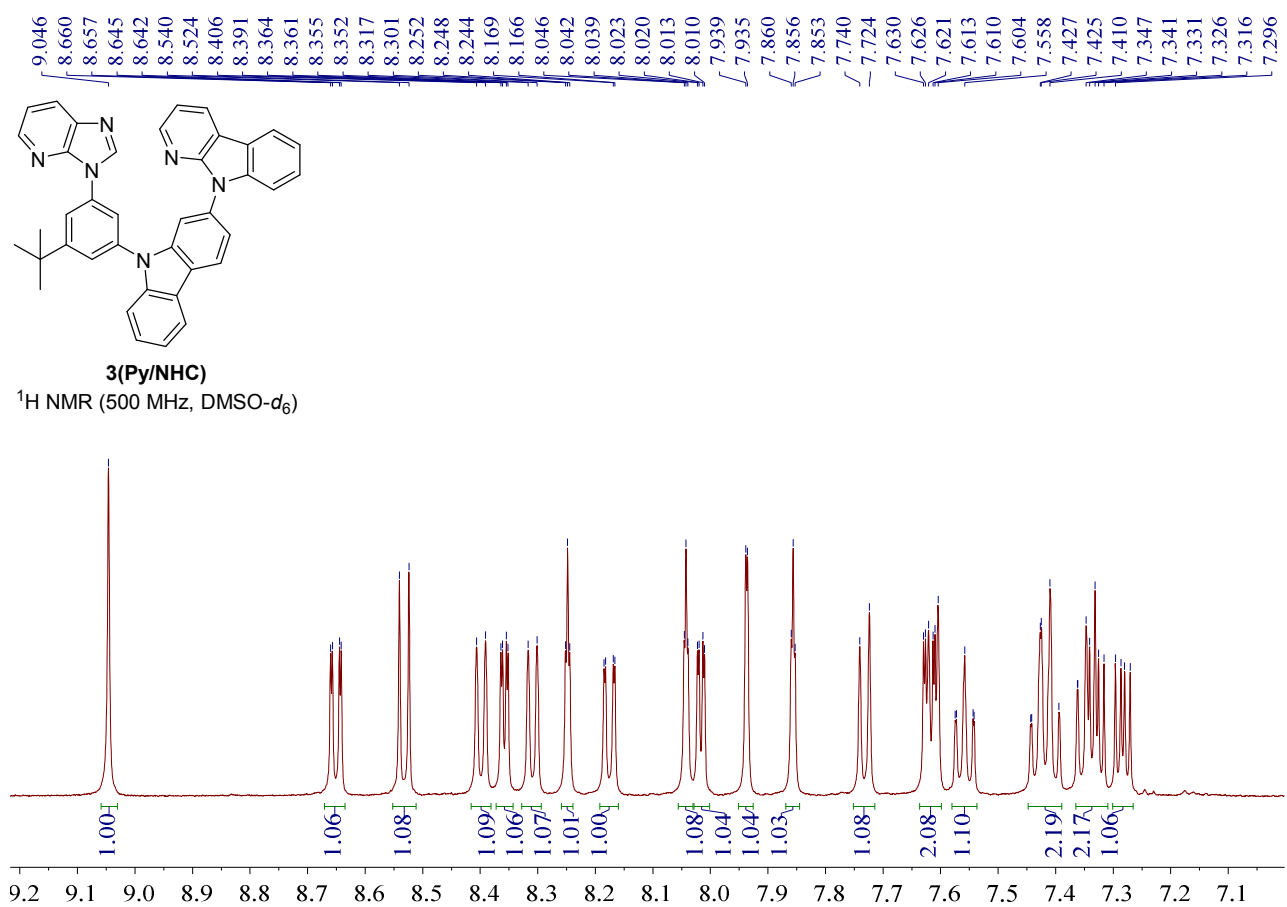

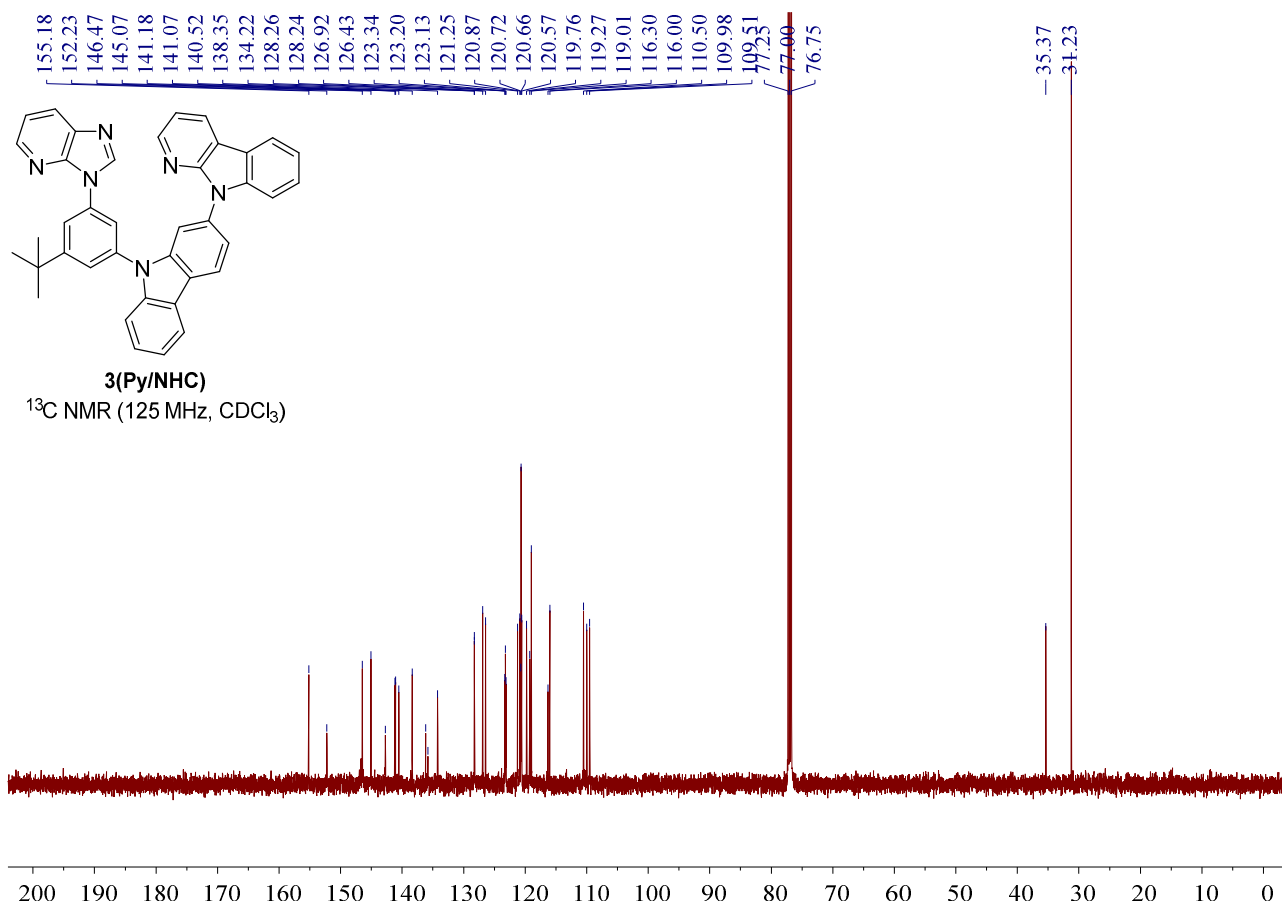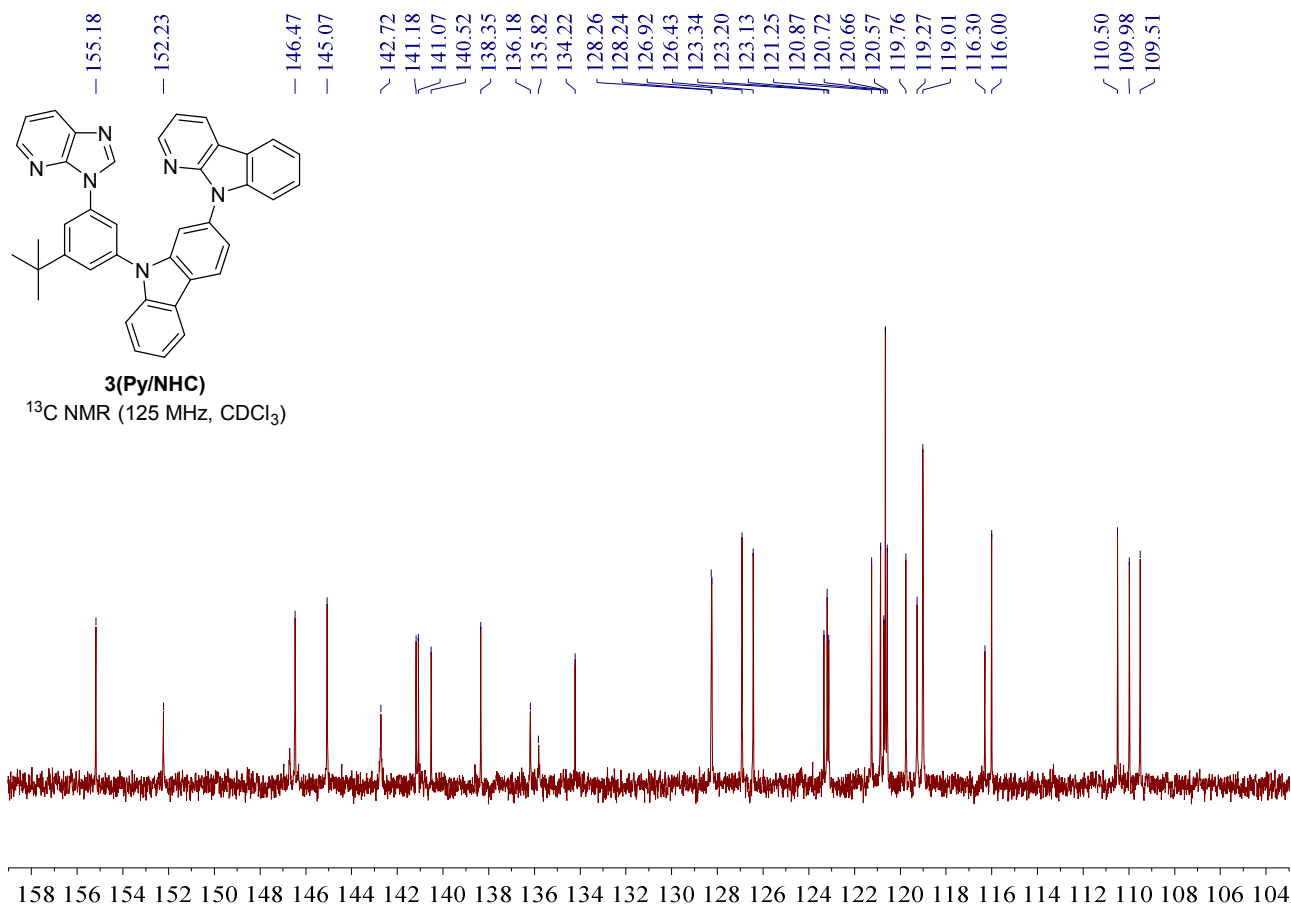

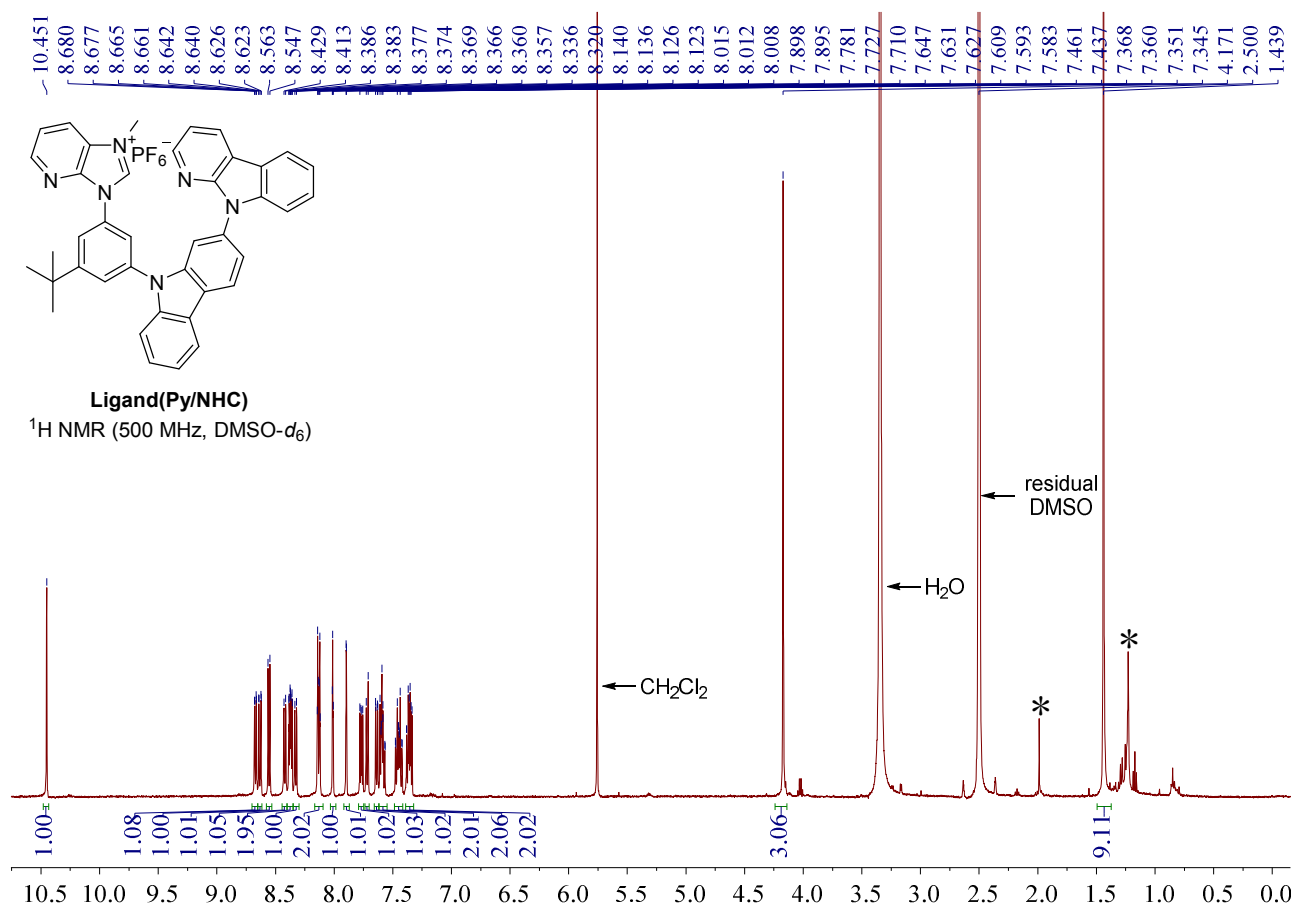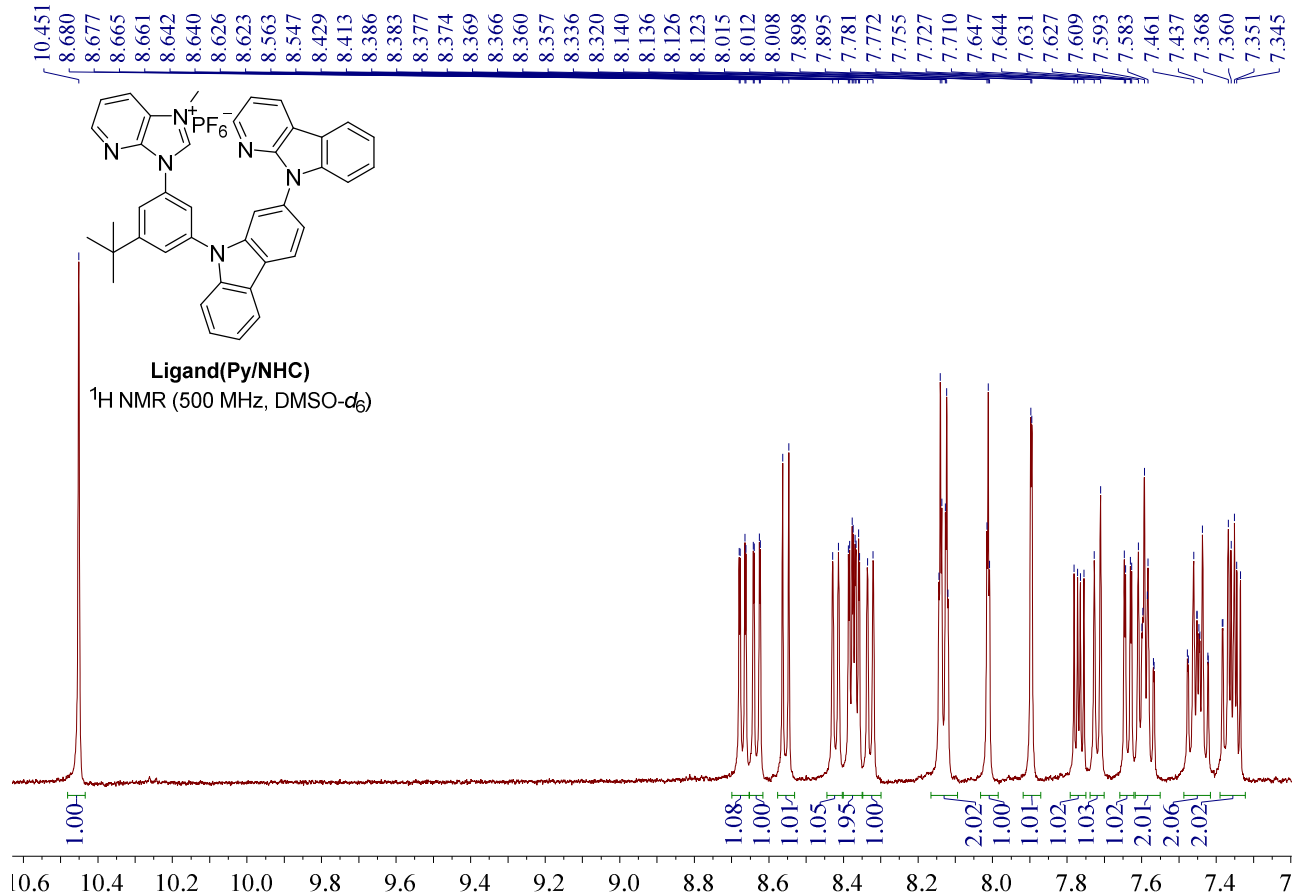

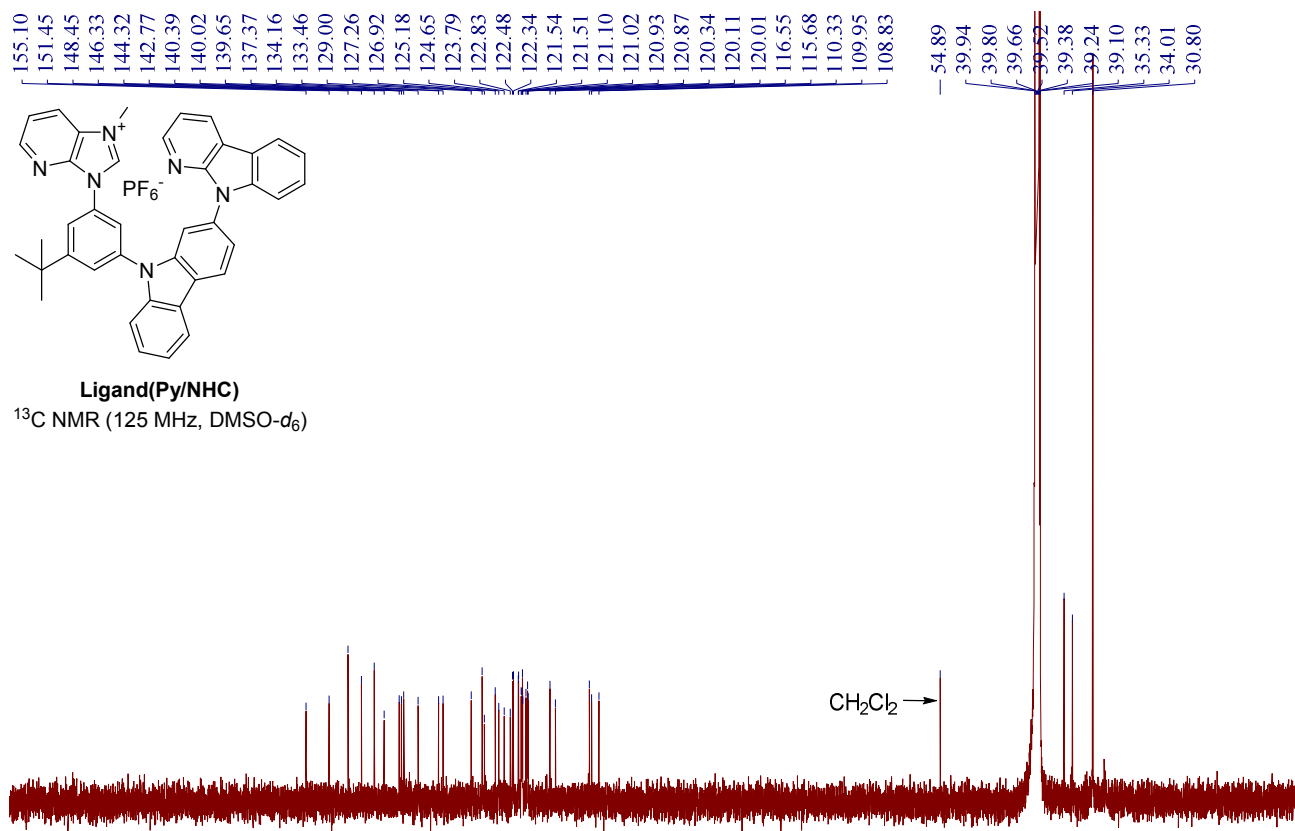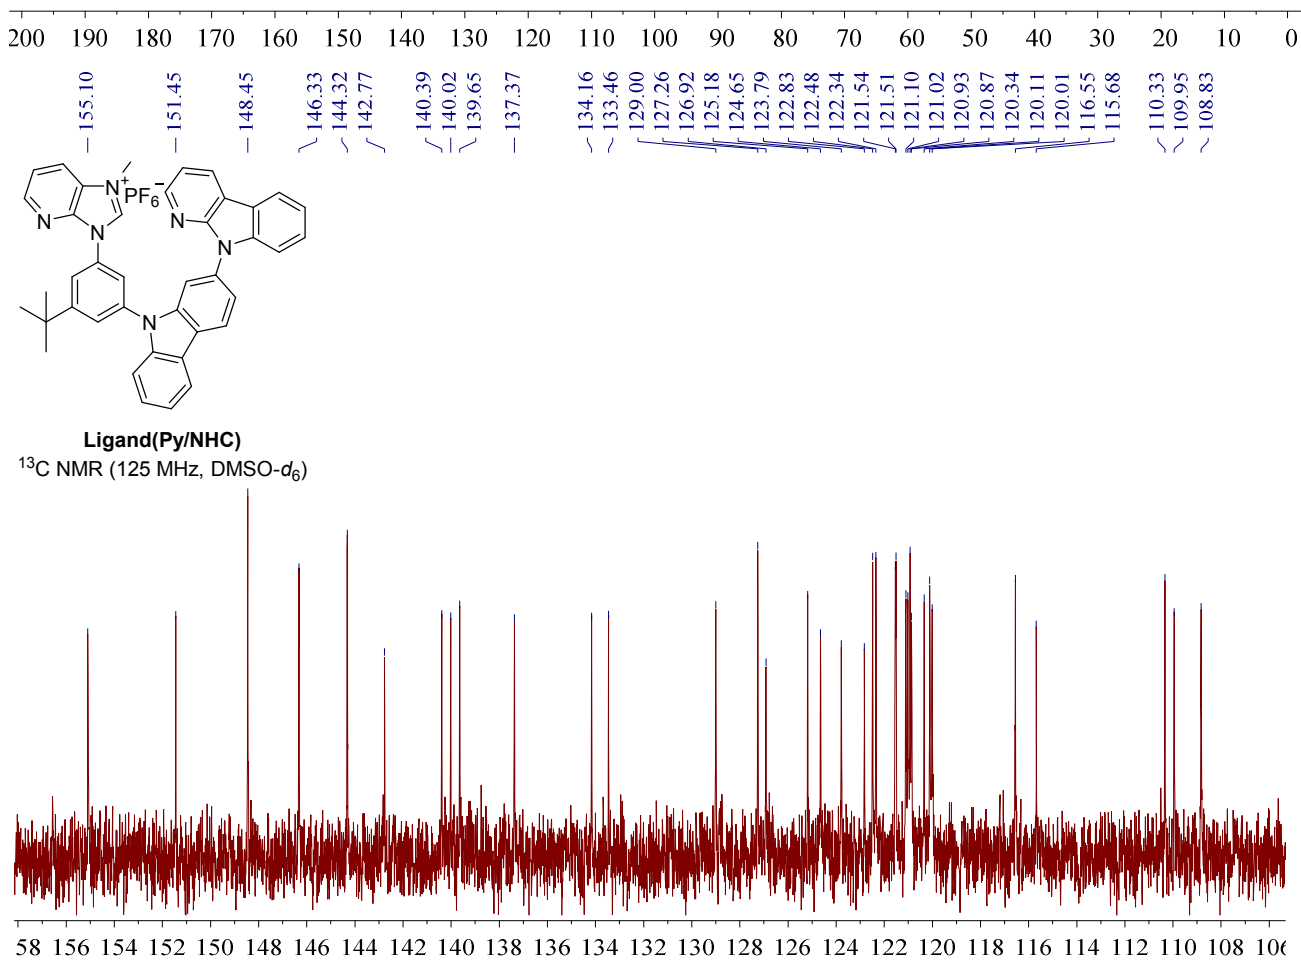

ligand\_3 #347-389 RT: 0.72-0.78 AV: 5 NL: 2.78E6  
T: FTMS + p ESI Full ms [100.0000-1000.0000]  $[M-PF_6]^+$

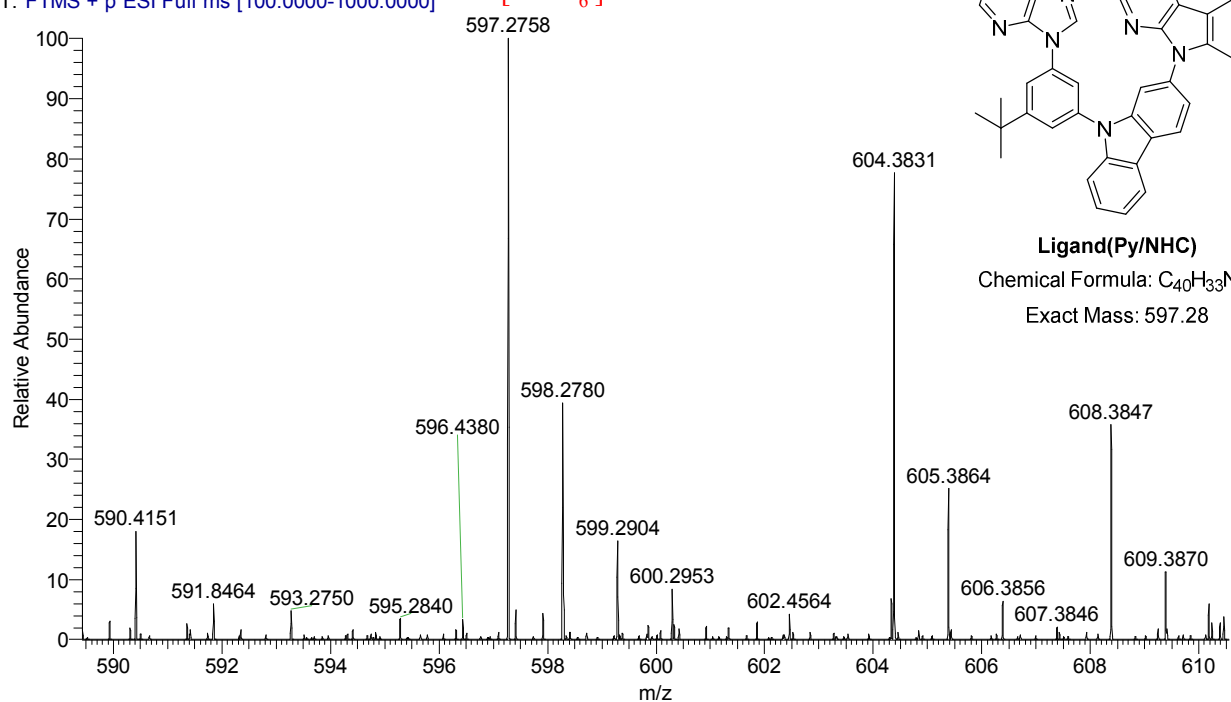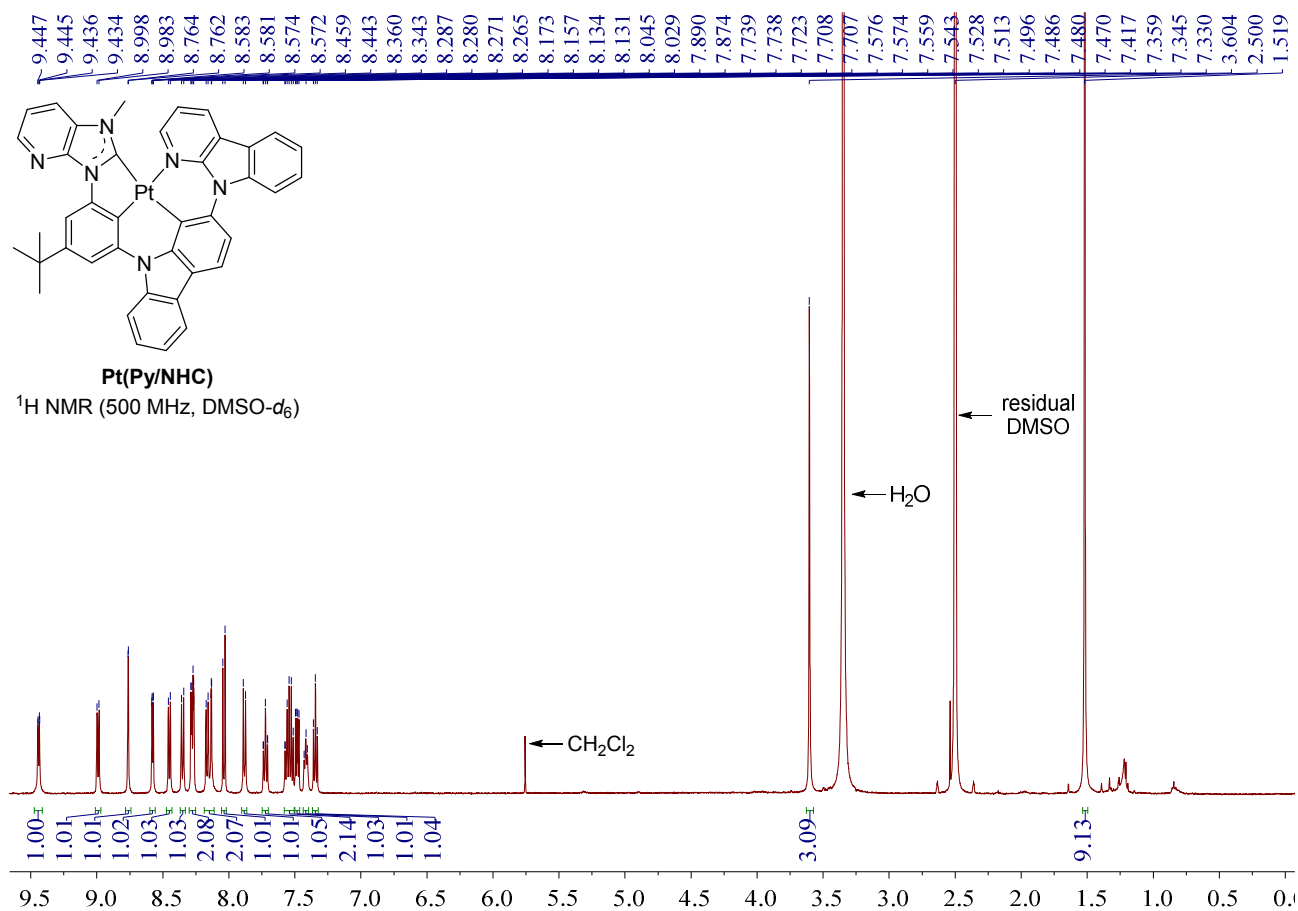

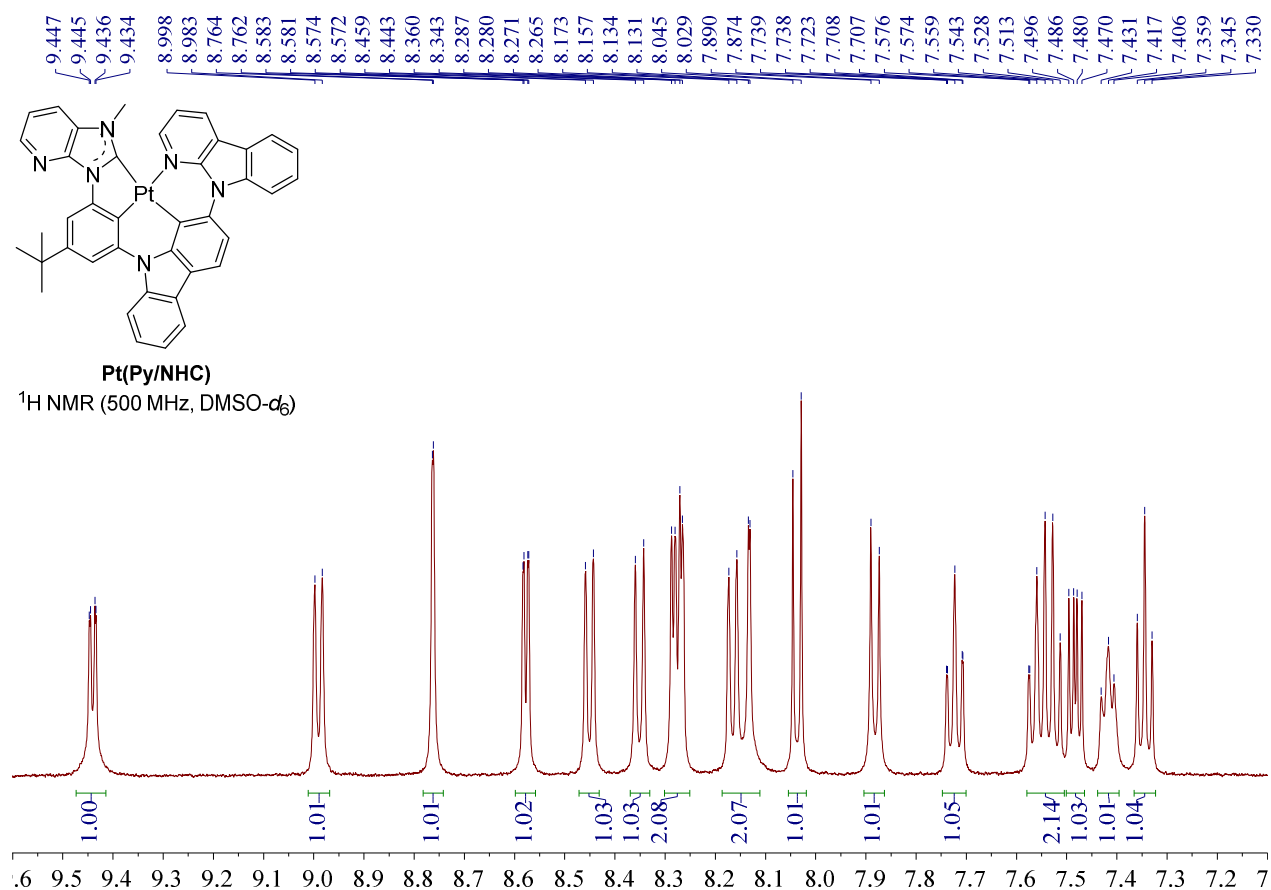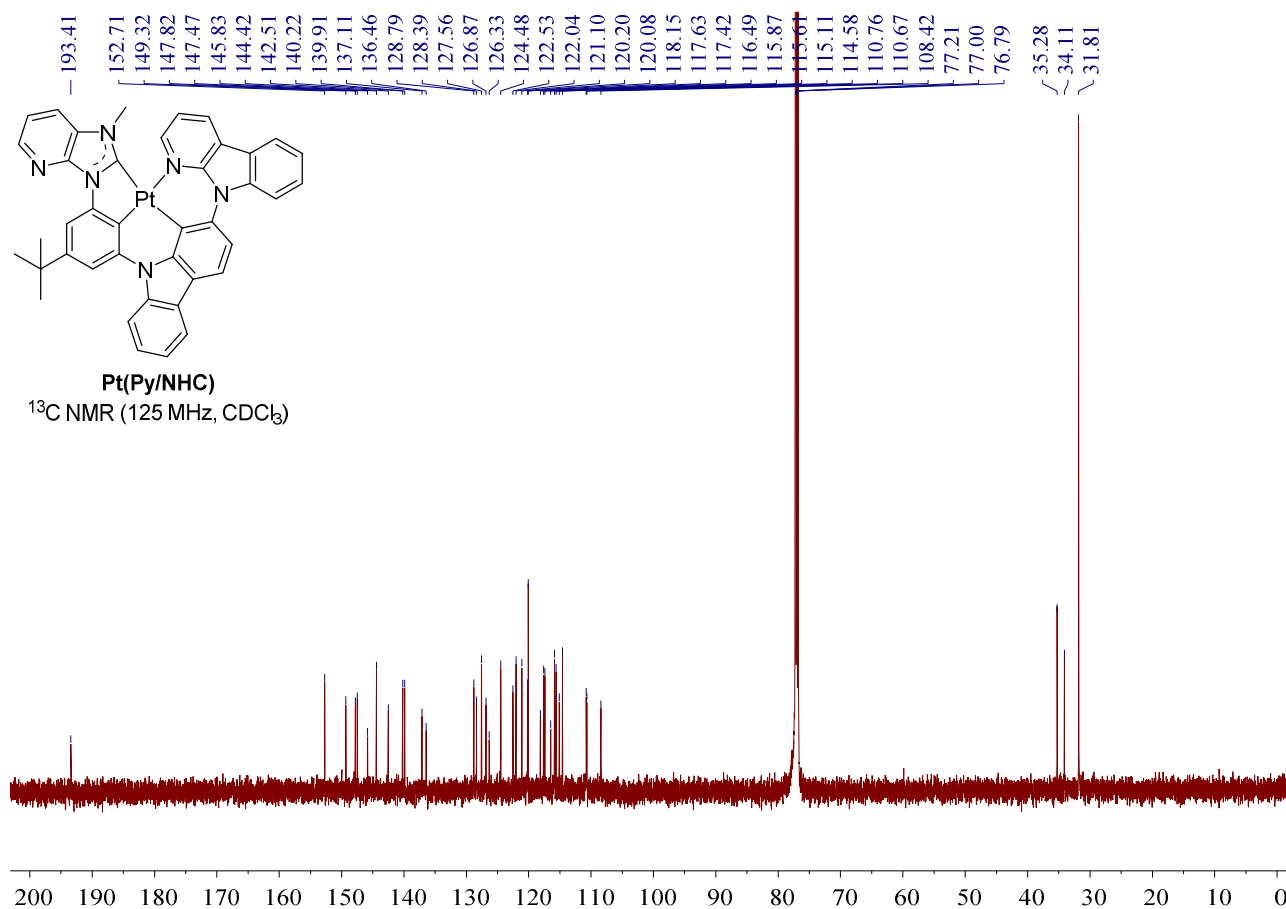

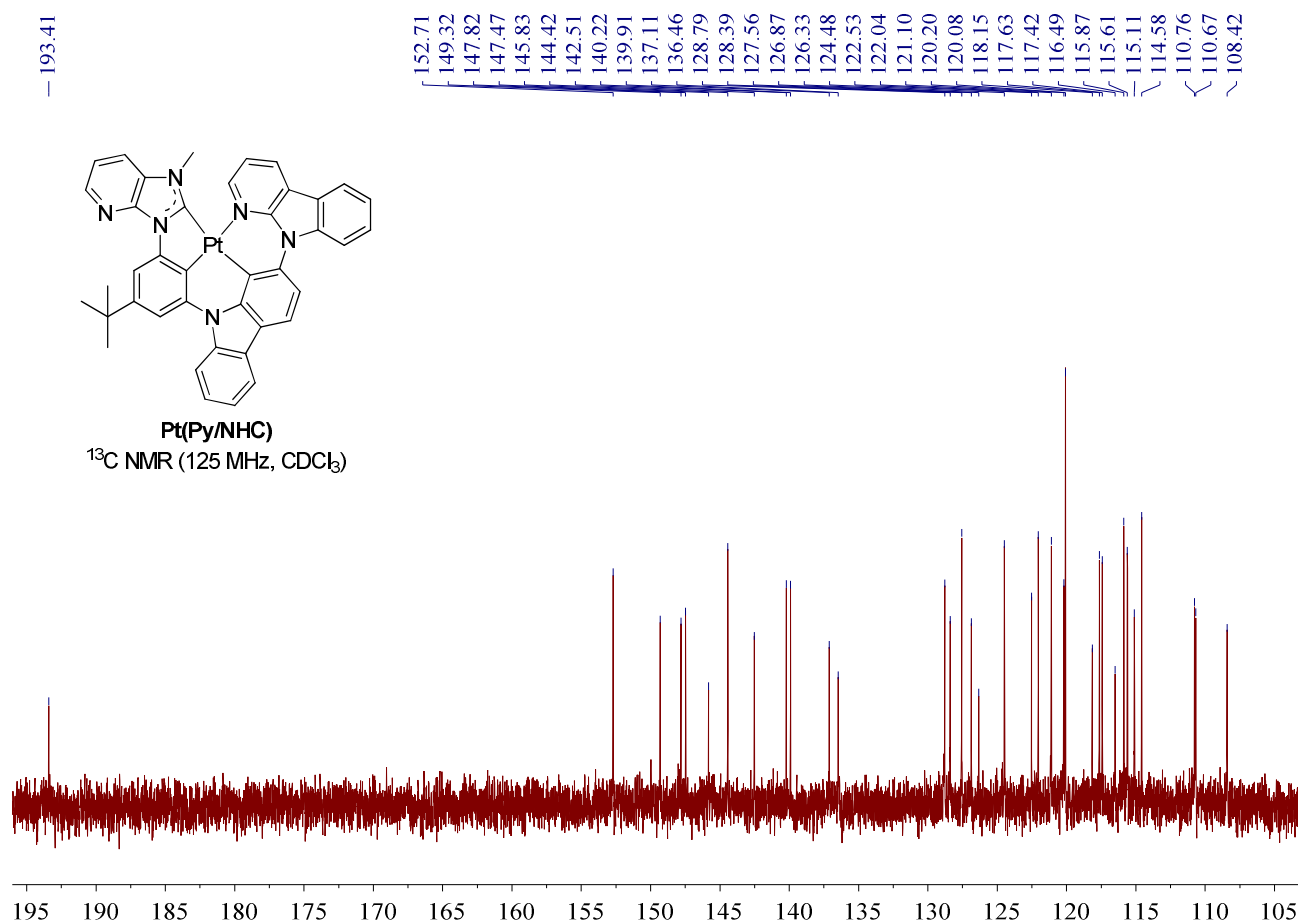

PTLS3\_2 #559-584 RT: 1.02-1.05 AV: 3 NL: 2.37E7  
 T: FTMS + p ESI Full ms [100.0000-1500.0000]

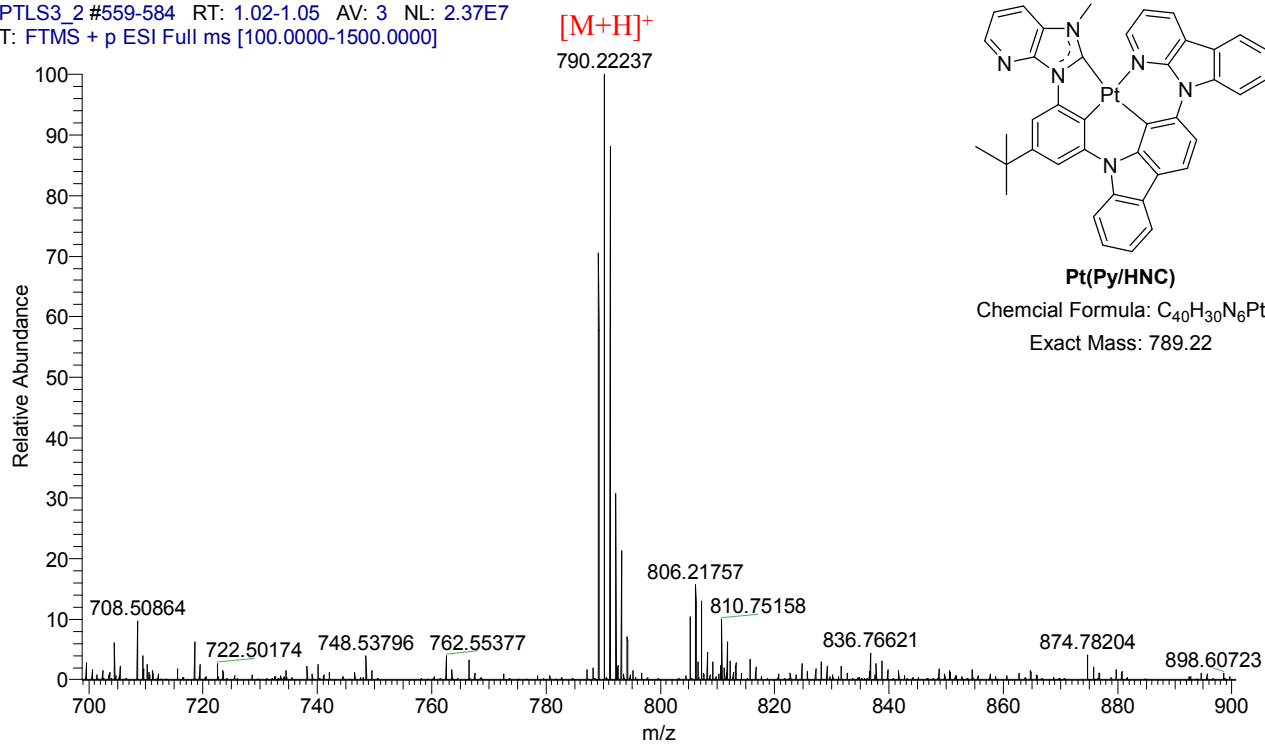

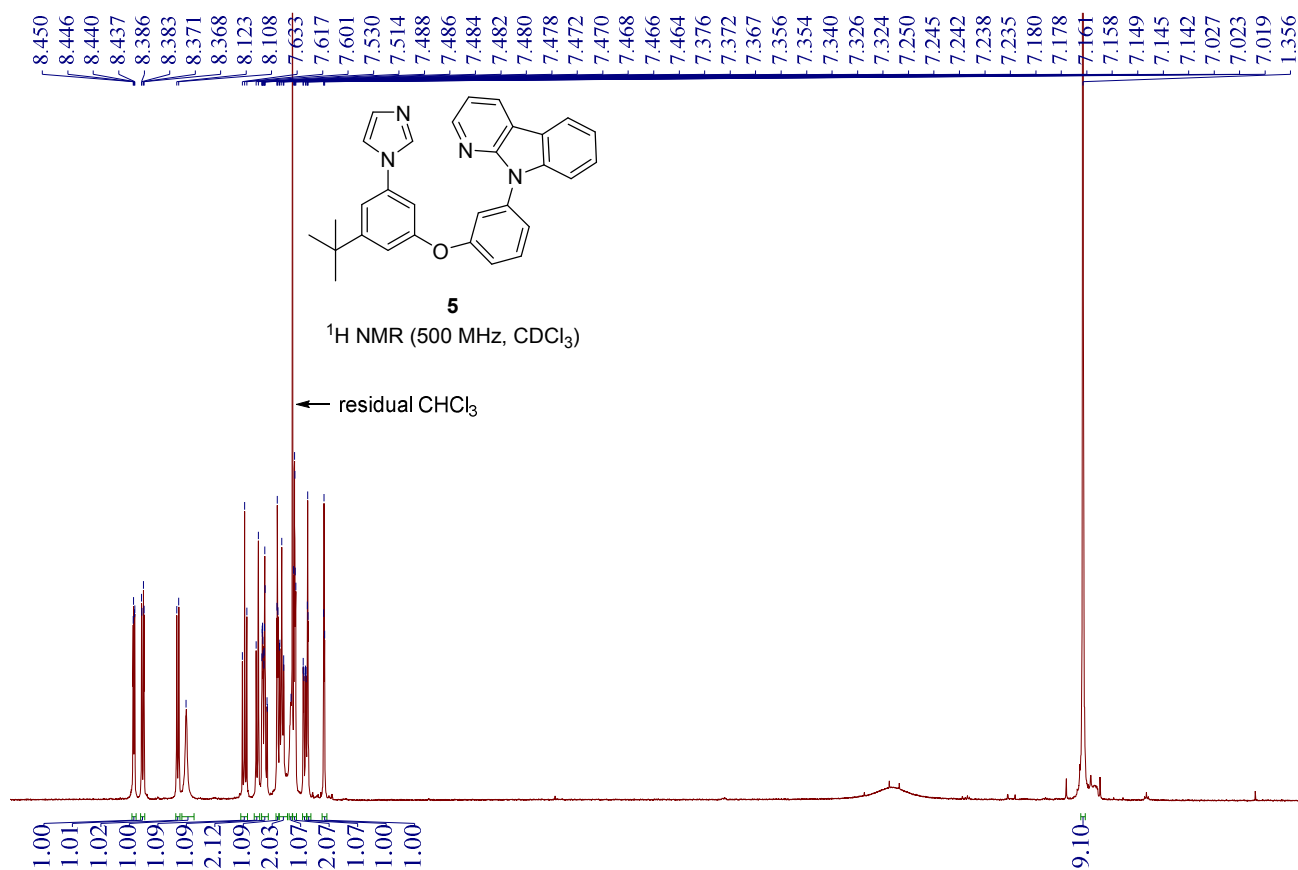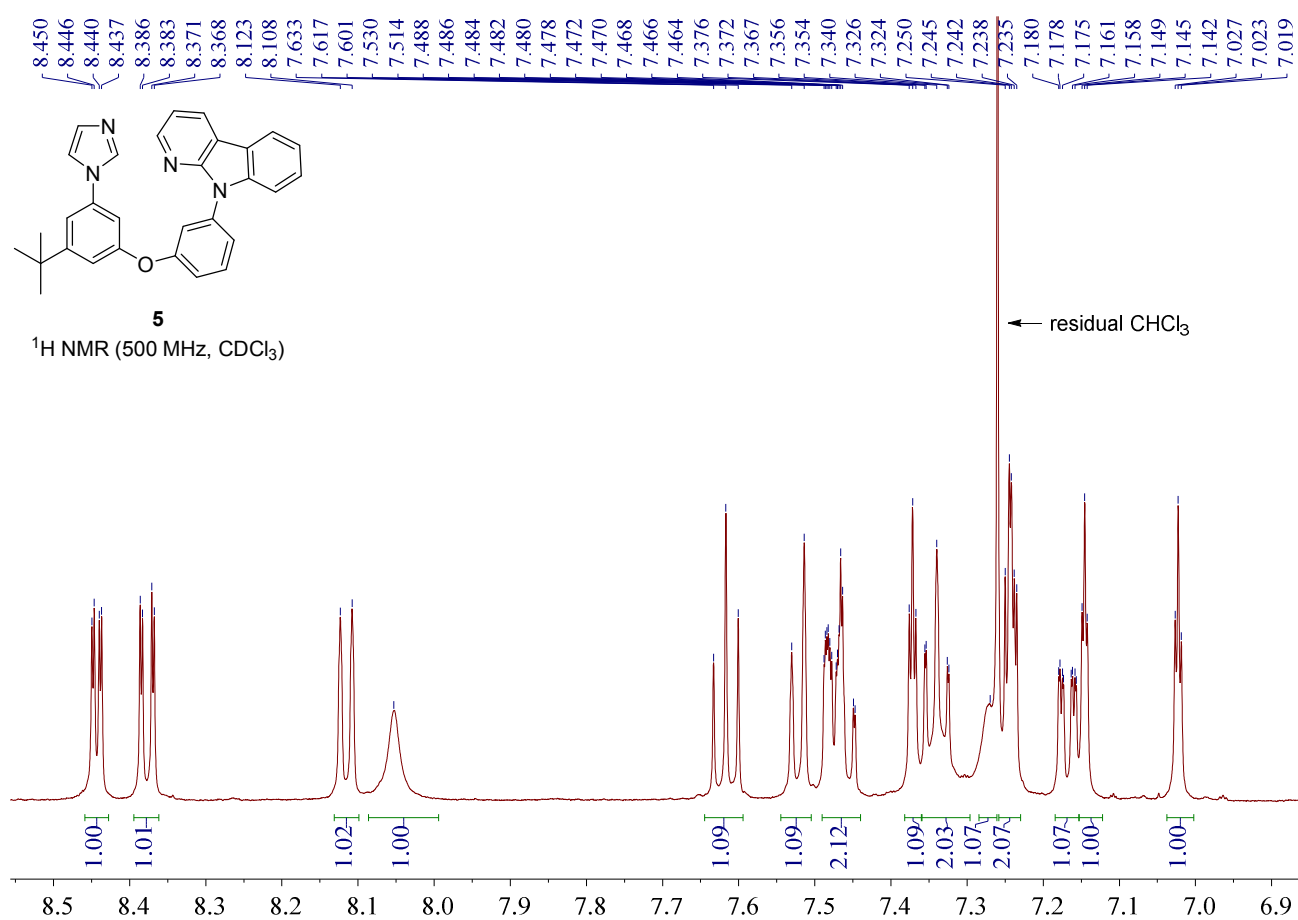

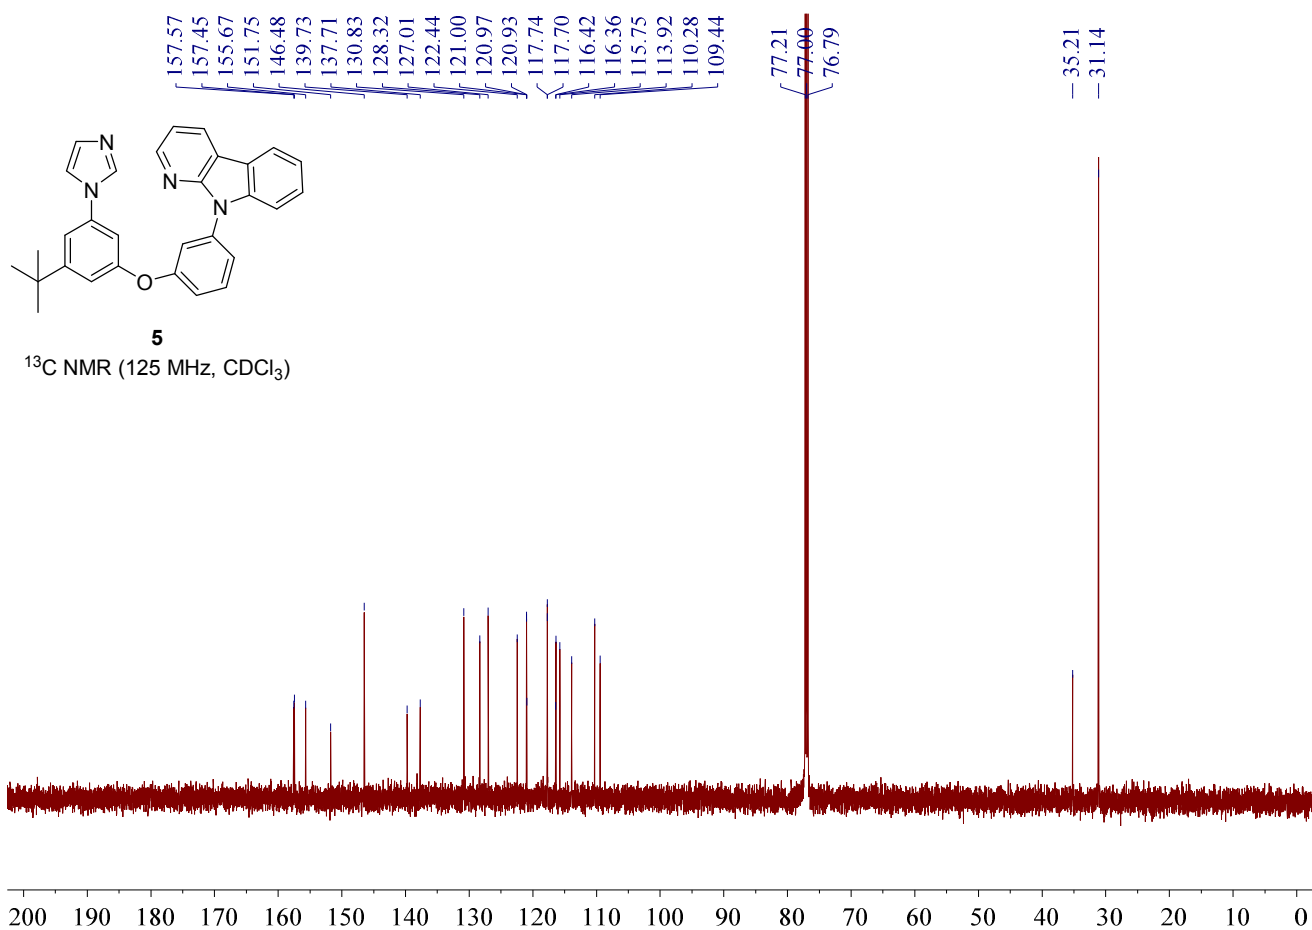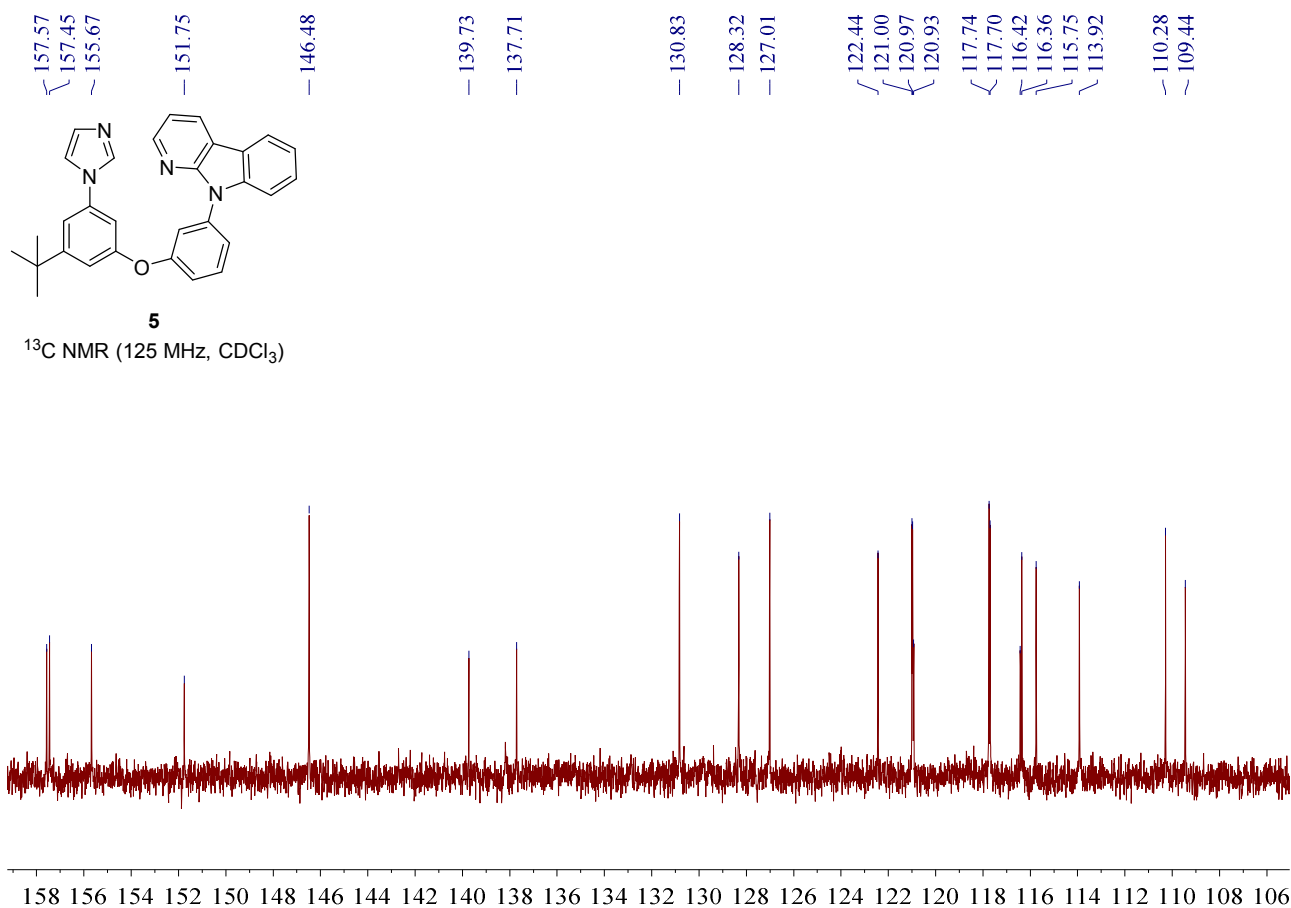

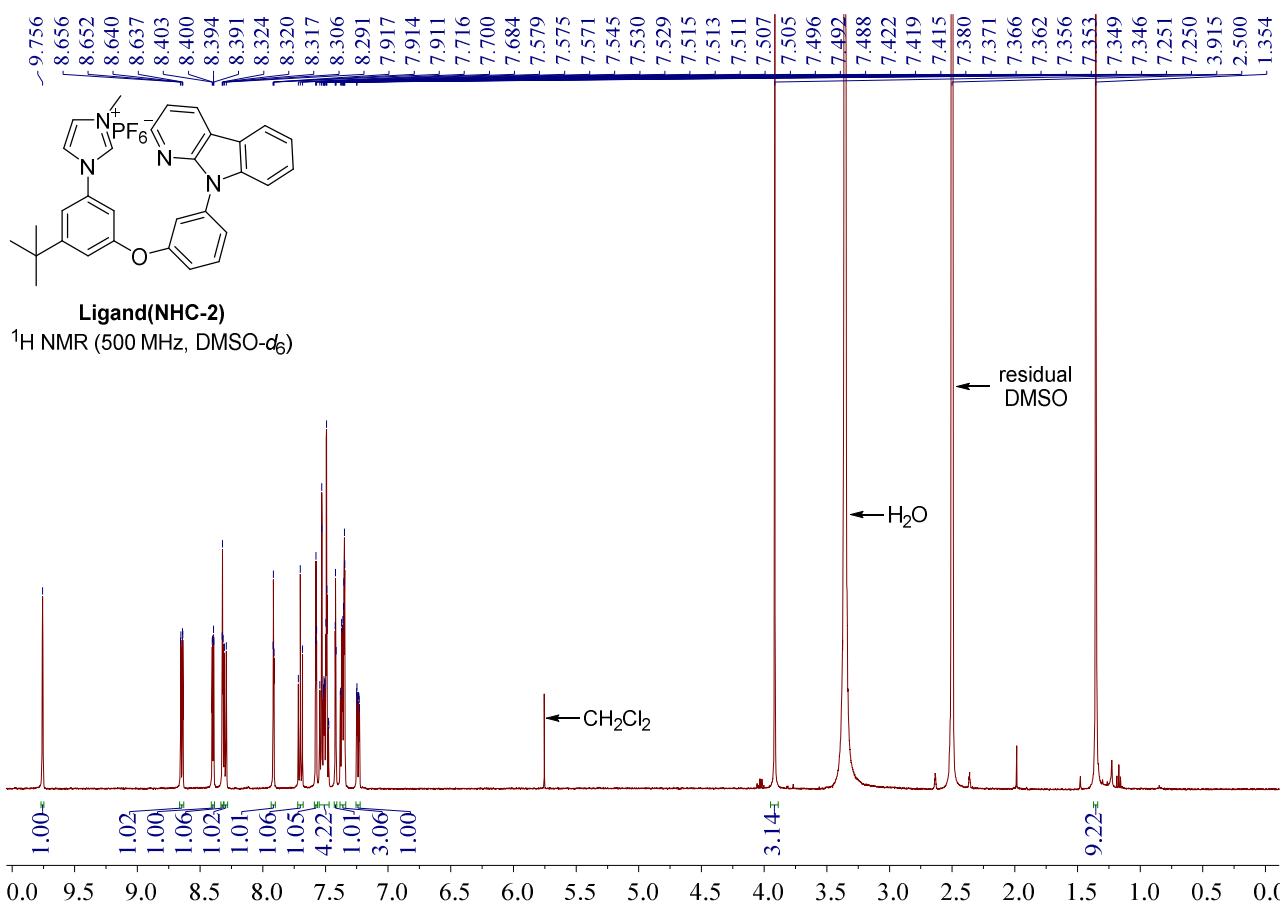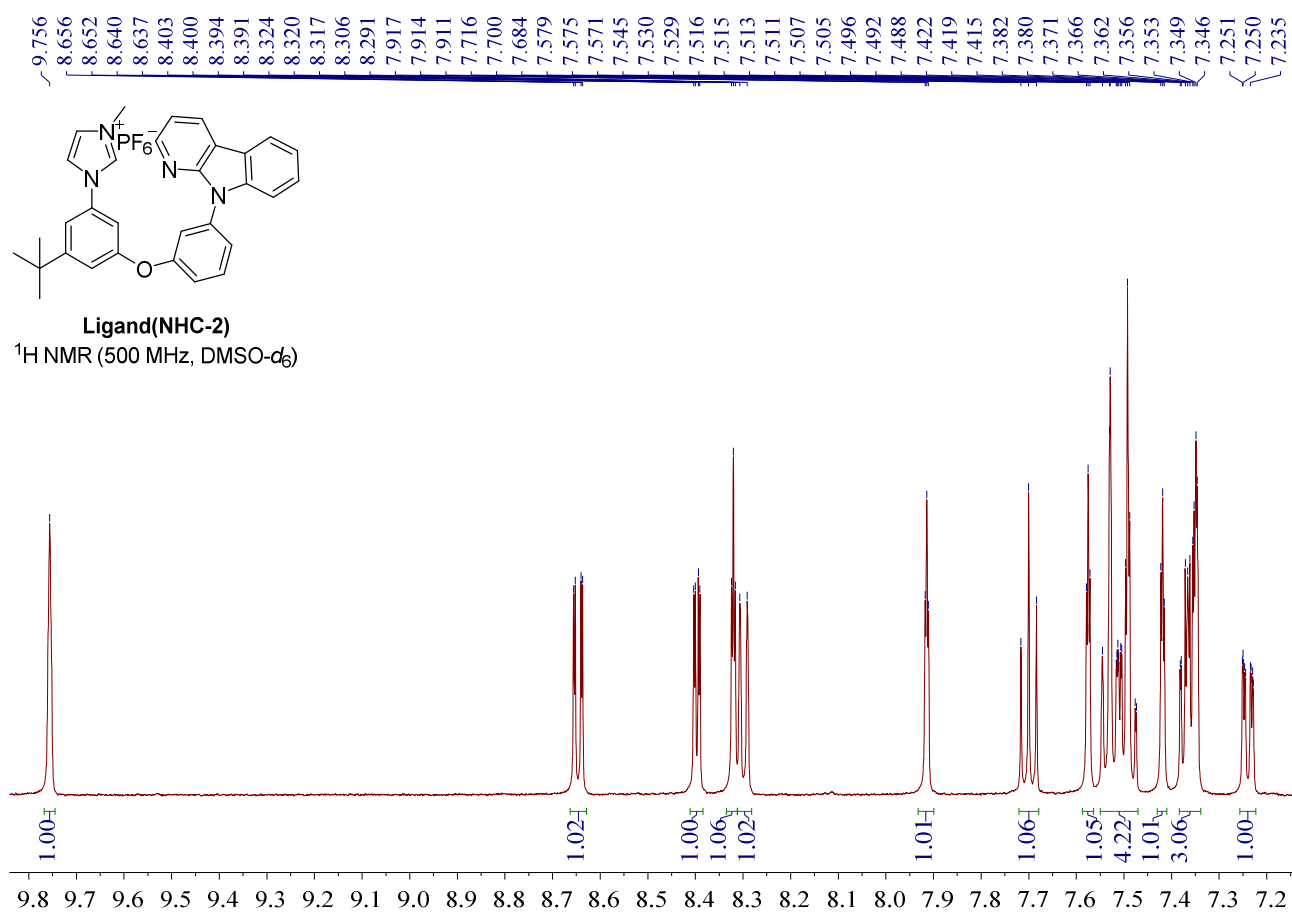

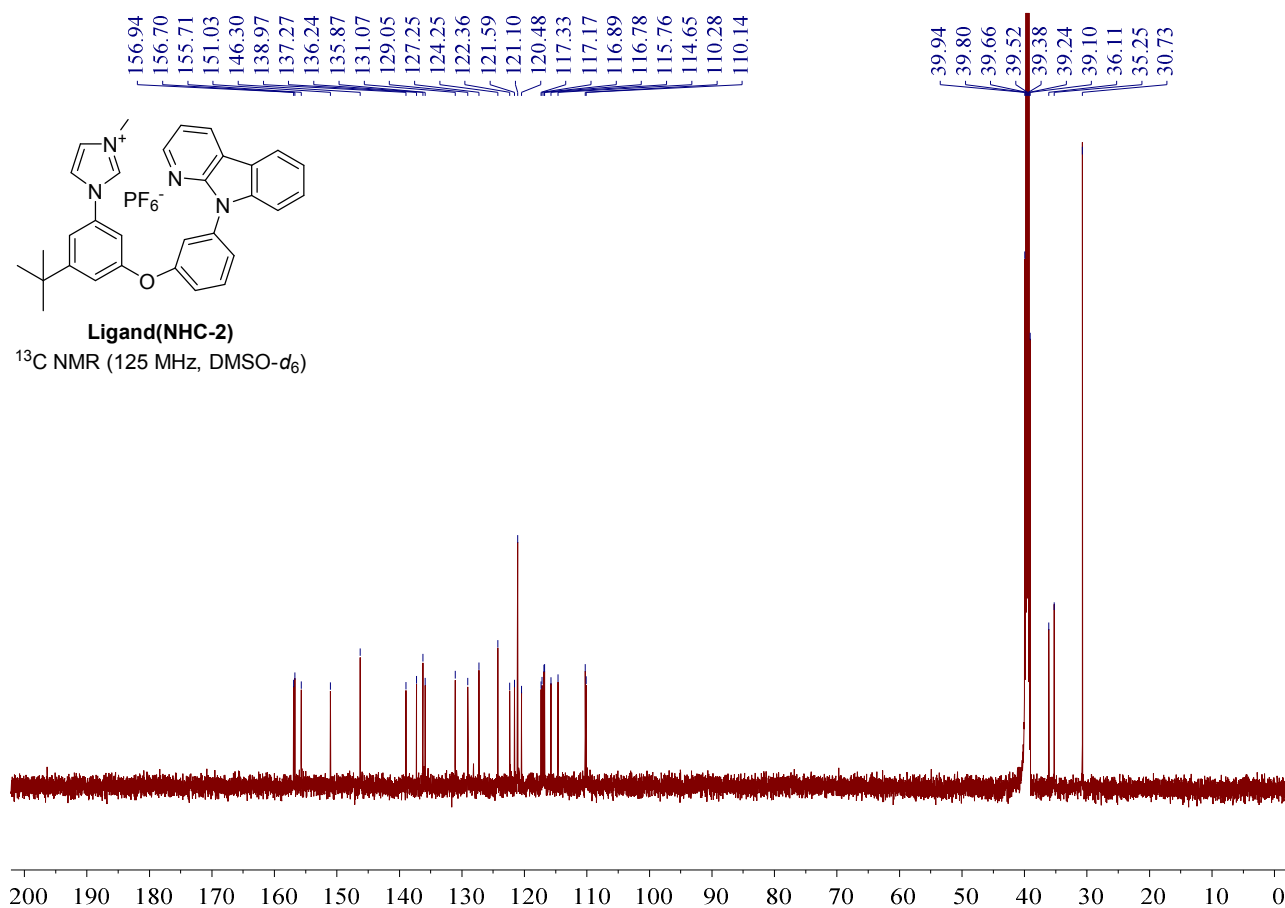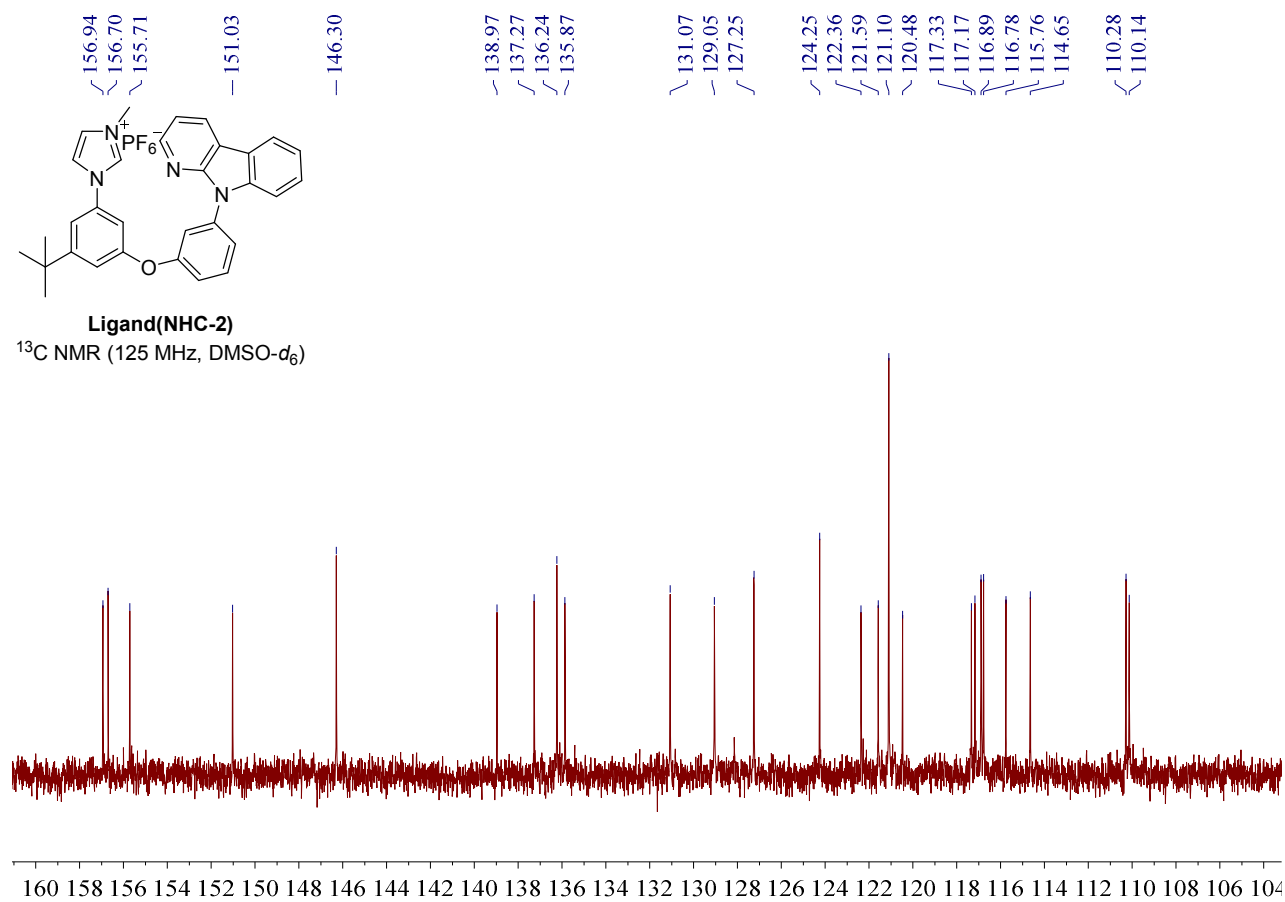

ligand\_4 #315-361 RT: 0.65-0.73 AV: 6 NL: 2.08E8  
T: FTMS + p ESI Full ms [100.0000-1000.0000]

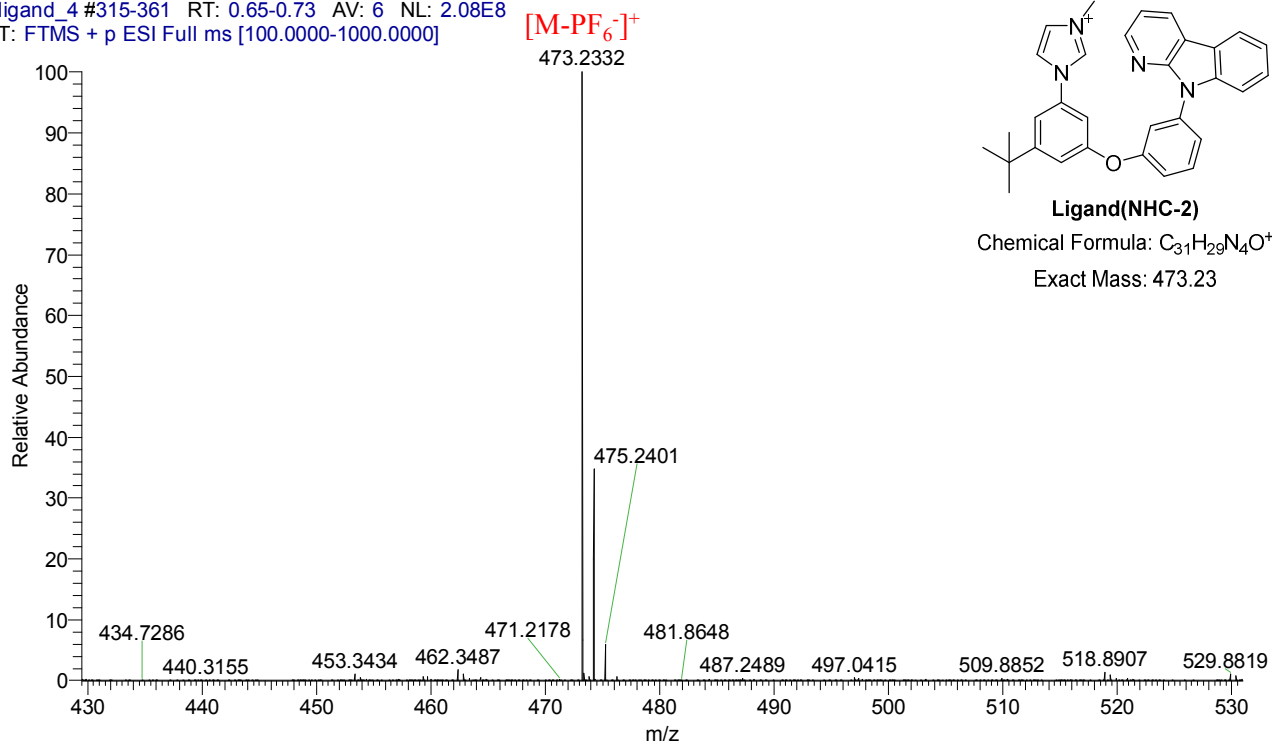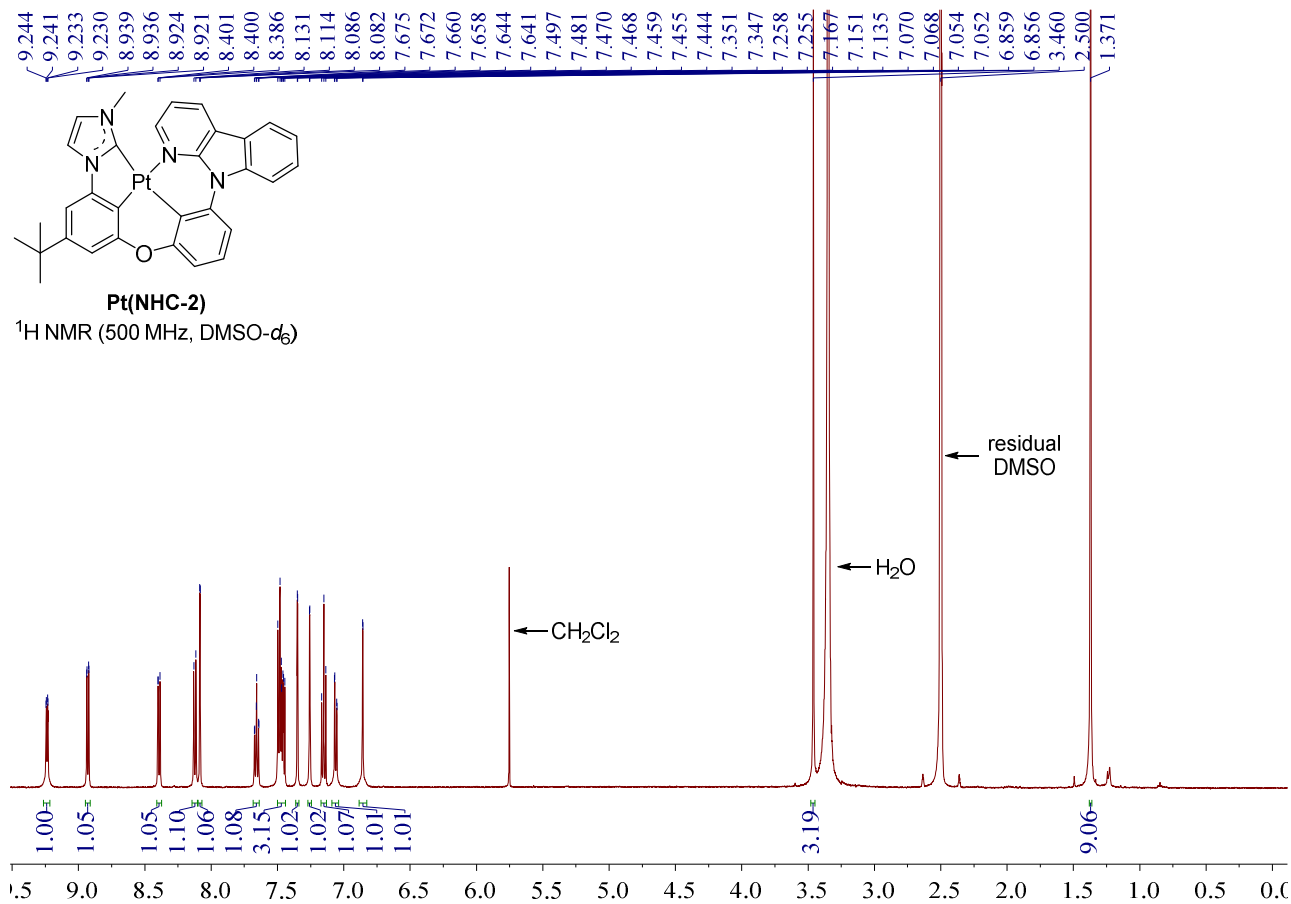

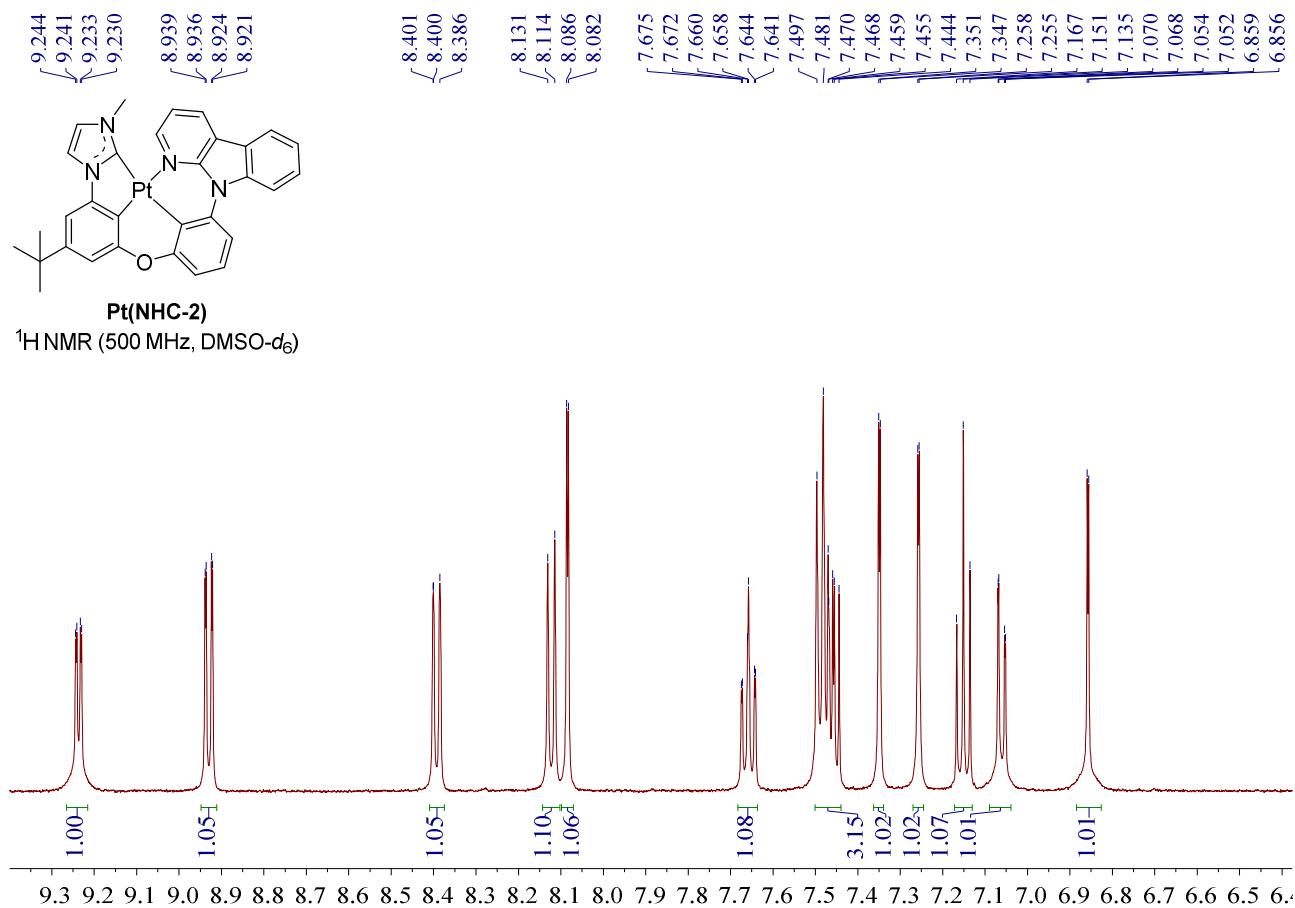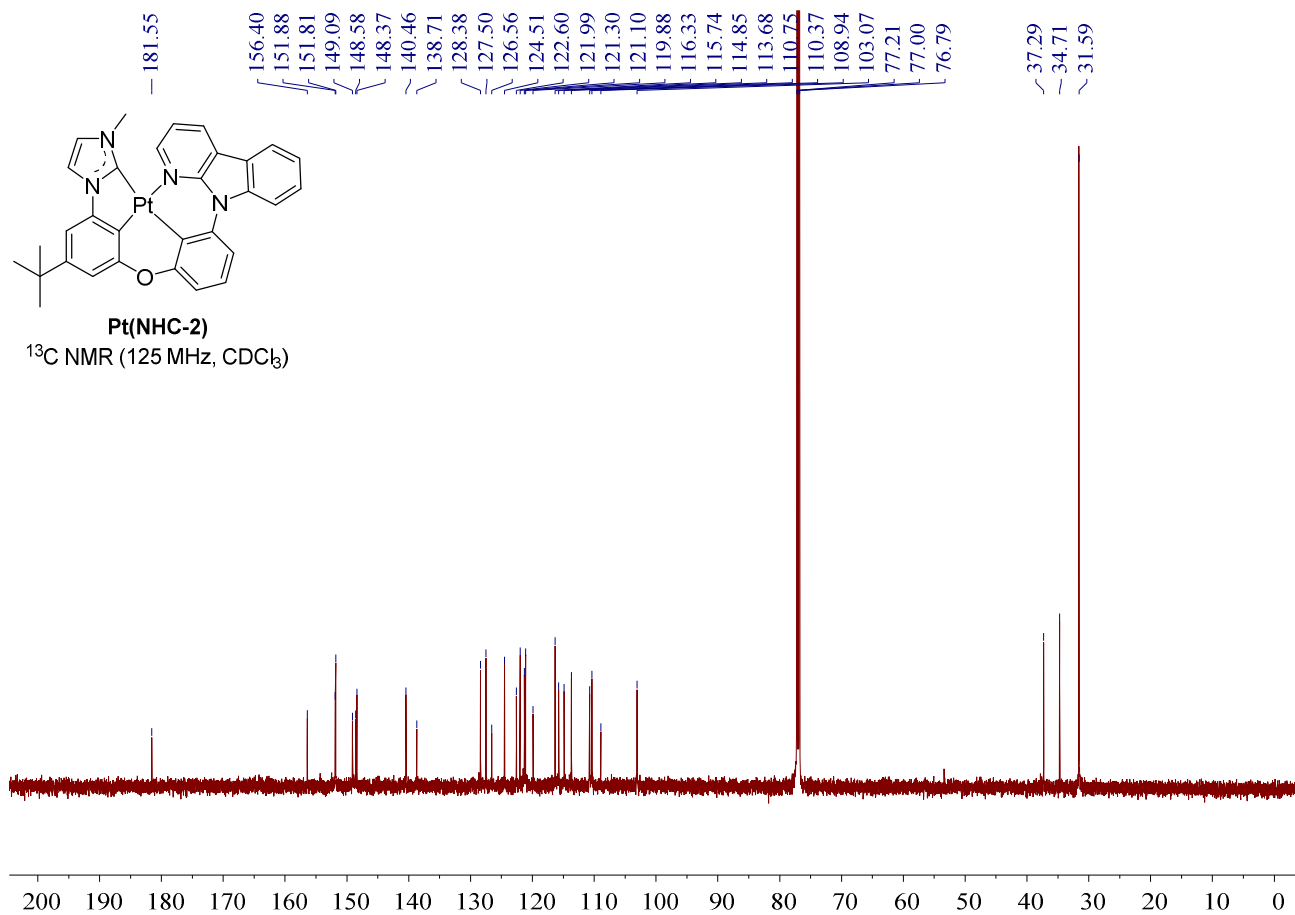

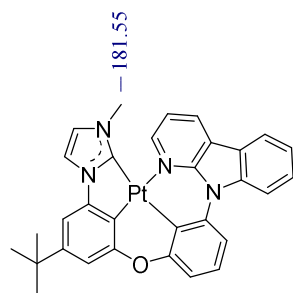

**Pt(NHC-2)**

$^{13}\text{C}$  NMR (125 MHz,  $\text{CDCl}_3$ )

$\delta$  181.55, 156.40, 151.88, 151.81, 149.09, 148.58, 148.37, 140.46, 138.71, 128.38, 127.50, 126.56, 124.51, 122.60, 121.99, 121.30, 121.10, 119.88, 116.33, 115.74, 114.85, 113.68, 110.75, 110.37, 108.94, 103.07

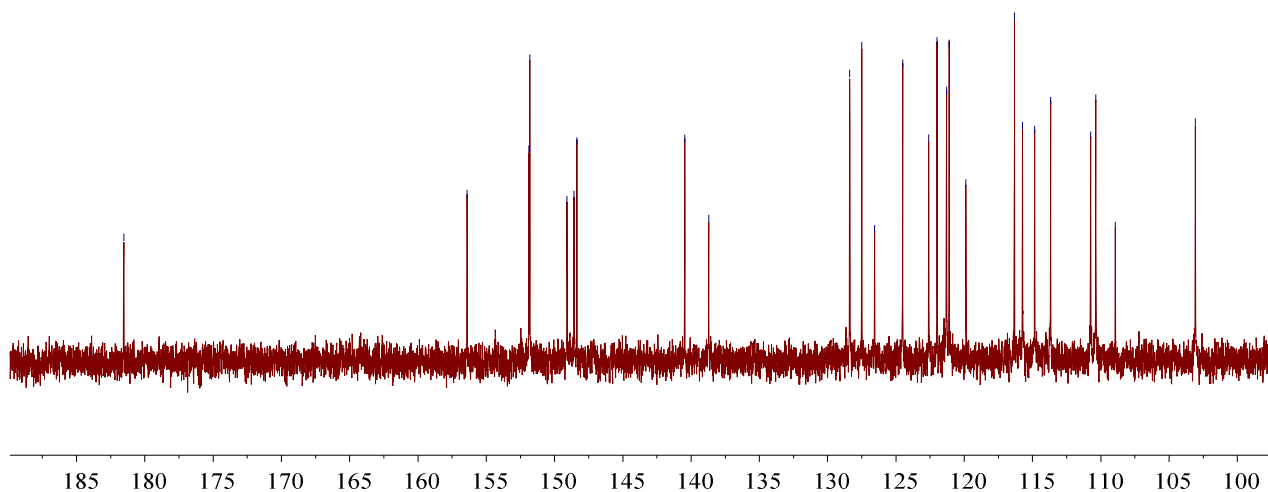

ptls\_4 #888-982 RT: 1.76-1.94 AV: 11 NL: 1.62E7  
 T: FTMS + p ESI Full ms [100.0000-1000.0000]

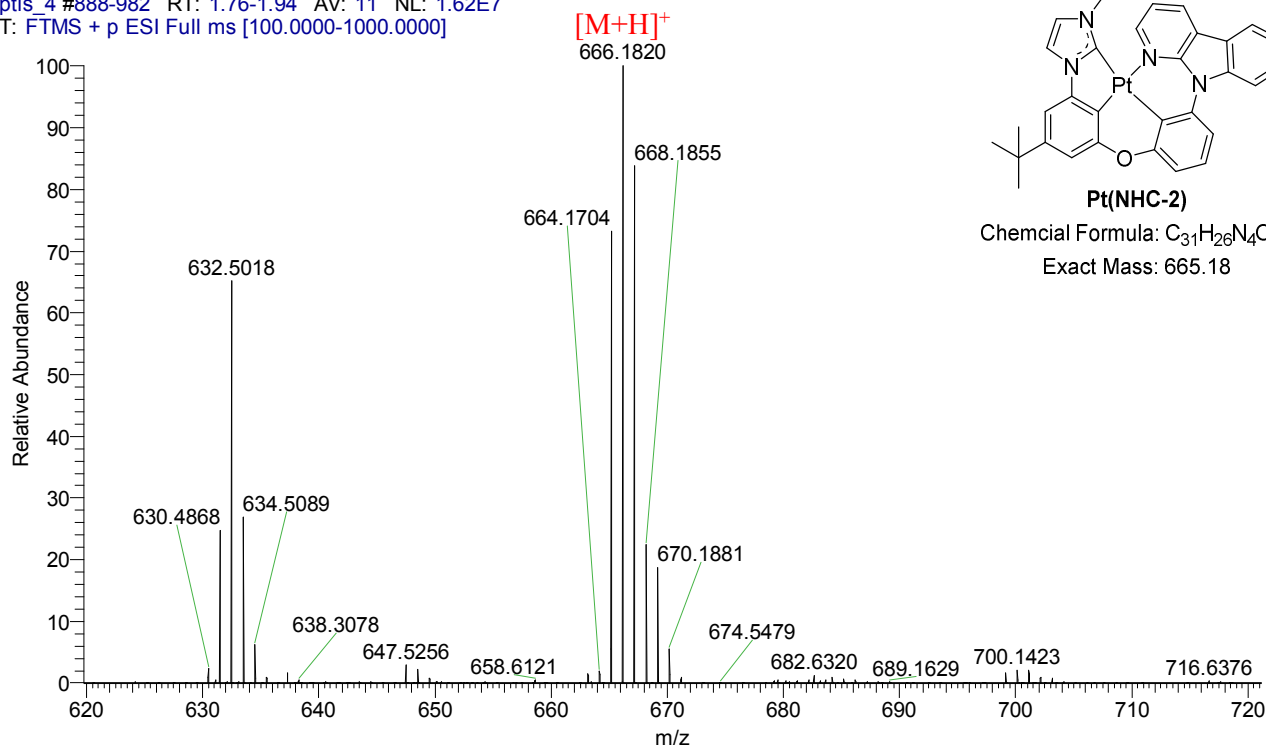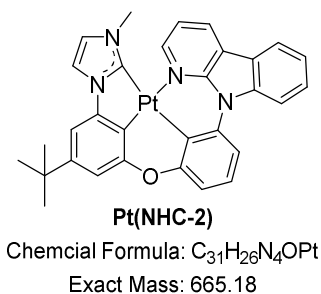

## Cartesian coordinates of the optimized structures

### **Pt (NHC-1) \_S<sub>0</sub>**

|   |             |             |             |
|---|-------------|-------------|-------------|
| C | 2.40155340  | -1.78795640 | 0.28188490  |
| C | 3.55276950  | 0.61285530  | 0.84861230  |
| C | 3.67618500  | -1.78113970 | 0.83461440  |
| C | 1.62894420  | -0.64033550 | 0.03865610  |
| C | 2.28938600  | 0.58231840  | 0.23008880  |
| C | 4.25792150  | -0.55170030 | 1.17442780  |
| H | 4.19493710  | -2.71419220 | 1.02021980  |
| N | 1.76726170  | -2.98865360 | -0.16956690 |
| N | 0.28213920  | -4.02559280 | -1.33982130 |
| C | 1.39108720  | -4.86601450 | -1.24289540 |
| C | 2.32611440  | -4.20775560 | -0.51303770 |
| H | 1.41228200  | -5.84131300 | -1.70421090 |
| H | 3.32651690  | -4.49465070 | -0.23194260 |
| C | -0.83842000 | -4.29602420 | -2.23276310 |
| H | -1.39586980 | -3.37239110 | -2.38739400 |
| H | -1.50134050 | -5.06573250 | -1.82336610 |
| H | -0.45258520 | -4.63767550 | -3.19755910 |
| H | 3.97765580  | 1.57354710  | 1.10785530  |
| C | 5.62031390  | -0.44705250 | 1.88474900  |
| C | 6.24415920  | -1.82872600 | 2.15735560  |
| H | 6.42992220  | -2.38262100 | 1.22950330  |
| H | 5.60814370  | -2.44364820 | 2.80464540  |
| H | 7.20791450  | -1.70420310 | 2.66382700  |
| C | 5.43540650  | 0.27256670  | 3.24255910  |
| H | 5.03134220  | 1.28206250  | 3.11429380  |
| H | 6.39664200  | 0.35884300  | 3.76475050  |
| H | 4.74486290  | -0.28273830 | 3.88737160  |
| C | 6.60897580  | 0.36005430  | 1.01090830  |
| H | 6.24370000  | 1.37341920  | 0.81388370  |
| H | 6.77093470  | -0.13225310 | 0.04498950  |
| H | 7.57974980  | 0.44970680  | 1.51423820  |
| N | 1.67110660  | 1.77751480  | -0.19313660 |

|   |             |             |             |
|---|-------------|-------------|-------------|
| C | 2.31669320  | 2.96058540  | -0.59040630 |
| C | 3.05880990  | 5.50824100  | -1.47661960 |
| C | 3.67335700  | 3.24205730  | -0.80300500 |
| C | 1.33270410  | 3.94051760  | -0.87991460 |
| C | 1.70895020  | 5.21790860  | -1.30768940 |
| C | 4.02498750  | 4.51780150  | -1.24156850 |
| H | 4.44017140  | 2.48973400  | -0.67242510 |
| H | 0.95061700  | 5.96730970  | -1.52055490 |
| H | 5.07499930  | 4.74137730  | -1.41173300 |
| H | 3.36608160  | 6.49573780  | -1.80973640 |
| C | 0.27913900  | 1.96877500  | -0.30296900 |
| C | -2.29534750 | 2.87276290  | -0.63580570 |
| C | 0.04968430  | 3.31107420  | -0.69423600 |
| C | -0.73883920 | 1.01325370  | -0.10823440 |
| C | -2.03638020 | 1.56585510  | -0.16404260 |
| C | -1.25763330 | 3.74856140  | -0.90627130 |
| H | -1.46298980 | 4.74606750  | -1.28478280 |
| H | -3.31594820 | 3.18081900  | -0.82562630 |
| N | -3.18466360 | 0.80845490  | 0.25128190  |
| C | -4.35040370 | 1.36152180  | 0.83473540  |
| C | -6.82747190 | 1.92454790  | 2.00860770  |
| C | -4.61700770 | 2.66630570  | 1.27140630  |
| C | -5.30114500 | 0.33511990  | 1.05346260  |
| C | -6.54648160 | 0.61959470  | 1.62533610  |
| C | -5.85716760 | 2.92764920  | 1.84846390  |
| H | -3.87871670 | 3.45242930  | 1.19086840  |
| H | -7.27183250 | -0.17417320 | 1.78397790  |
| H | -6.07054620 | 3.93690670  | 2.18967860  |
| H | -7.78751790 | 2.16678230  | 2.45487740  |
| C | -3.35304560 | -0.55977510 | 0.22382920  |
| C | -4.07528850 | -3.18489140 | 0.39920410  |
| C | -4.66576060 | -0.89816610 | 0.67486570  |
| N | -2.42245650 | -1.47376690 | -0.10211820 |
| C | -2.80653110 | -2.76748580 | 0.01618100  |
| C | -5.03669540 | -2.23185290 | 0.74031750  |

|    |             |             |             |
|----|-------------|-------------|-------------|
| H  | -2.03058260 | -3.49332770 | -0.17050350 |
| H  | -6.02804640 | -2.52439670 | 1.07460760  |
| H  | -4.28682740 | -4.24702440 | 0.46097330  |
| Pt | -0.31334980 | -0.98214450 | -0.27781550 |
| C  | 0.49723880  | -2.86090410 | -0.66349920 |

**Pt (Ph/NHC)\_S<sub>0</sub>**

|   |             |             |             |
|---|-------------|-------------|-------------|
| C | 2.50774190  | -0.67319830 | 0.45197510  |
| C | 2.87079030  | 2.00651280  | 0.86119220  |
| C | 3.68608280  | -0.24178030 | 1.05181630  |
| C | 1.44432210  | 0.18337030  | 0.11142410  |
| C | 1.70229240  | 1.55638690  | 0.22068450  |
| C | 3.86494500  | 1.12708470  | 1.30129490  |
| H | 4.43494920  | -0.95528360 | 1.36108420  |
| N | 2.26477980  | -2.03624110 | 0.07300230  |
| N | 1.08545920  | -3.48971960 | -1.06370020 |
| C | 0.07351990  | -4.02897860 | -1.96142350 |
| H | -0.73725310 | -3.30617900 | -2.04321160 |
| H | -0.31502620 | -4.98602940 | -1.59690210 |
| H | 0.51558160  | -4.18051330 | -2.95158270 |
| H | 2.98152940  | 3.06717060  | 1.04550440  |
| C | 5.10234770  | 1.67823530  | 2.03456860  |
| C | 6.11440150  | 0.57126110  | 2.38615220  |
| H | 6.49261200  | 0.06654930  | 1.48931080  |
| H | 5.68058970  | -0.18525630 | 3.05019040  |
| H | 6.97443230  | 1.00768980  | 2.90664570  |
| C | 4.65708720  | 2.36158280  | 3.34899020  |
| H | 3.95803800  | 3.18238020  | 3.15967750  |
| H | 5.52392960  | 2.77260040  | 3.88181030  |
| H | 4.15616420  | 1.64662330  | 4.01170550  |
| C | 5.82399800  | 2.71320620  | 1.13941600  |
| H | 5.18436770  | 3.57176680  | 0.90943770  |
| H | 6.13177890  | 2.26177400  | 0.18922670  |
| H | 6.72115170  | 3.09573980  | 1.64187870  |
| N | 0.77797200  | 2.48174830  | -0.30931840 |

|   |             |             |             |
|---|-------------|-------------|-------------|
| C | 1.06934590  | 3.76331840  | -0.80656020 |
| C | 1.08161140  | 6.33035320  | -1.91678880 |
| C | 2.29478830  | 4.40875810  | -1.02102790 |
| C | -0.14307940 | 4.38505570  | -1.20244150 |
| C | -0.13302580 | 5.67484800  | -1.74381130 |
| C | 2.28169350  | 5.68919590  | -1.57193020 |
| H | 3.23908360  | 3.92607180  | -0.80548370 |
| H | -1.06527350 | 6.15010040  | -2.03873570 |
| H | 3.22858050  | 6.19467360  | -1.74313910 |
| H | 1.10479380  | 7.33195530  | -2.33714500 |
| C | -0.60345450 | 2.25053470  | -0.45367180 |
| C | -3.31388920 | 2.32684530  | -0.90148880 |
| C | -1.19615240 | 3.42733610  | -0.97531790 |
| C | -1.30631470 | 1.06070060  | -0.18062320 |
| C | -2.70504000 | 1.20001900  | -0.30438500 |
| C | -2.56484770 | 3.44076350  | -1.24353840 |
| H | -3.03653020 | 4.29625190  | -1.71911220 |
| H | -4.37196990 | 2.30577700  | -1.13074480 |
| N | -3.59662880 | 0.17924710  | 0.17290560  |
| C | -4.89162820 | 0.41672230  | 0.69561520  |
| C | -7.45921930 | 0.33228090  | 1.80631930  |
| C | -5.54241080 | 1.61999140  | 1.00018640  |
| C | -5.50511800 | -0.81853260 | 1.01617120  |
| C | -6.79615110 | -0.86180520 | 1.55466980  |
| C | -6.82132250 | 1.55689850  | 1.54773270  |
| H | -5.06505520 | 2.57759580  | 0.84361050  |
| H | -7.26086100 | -1.81581280 | 1.78957450  |
| H | -7.33134390 | 2.48593650  | 1.78724660  |
| H | -8.46086520 | 0.32171620  | 2.22586310  |
| C | -3.35477950 | -1.17389620 | 0.28475300  |
| C | -3.27811680 | -3.86567710 | 0.73170260  |
| C | -4.52336970 | -1.83948770 | 0.76719560  |
| N | -2.18755660 | -1.80127560 | 0.05442950  |
| C | -2.17705570 | -3.13287380 | 0.30690010  |
| C | -4.48729080 | -3.20963060 | 0.97064280  |

|    |             |             |             |
|----|-------------|-------------|-------------|
| H  | -1.21709270 | -3.61342000 | 0.19276670  |
| H  | -5.35897600 | -3.74775920 | 1.33202490  |
| H  | -3.17054510 | -4.93124760 | 0.90368690  |
| Pt | -0.30740960 | -0.72970720 | -0.17435770 |
| C  | 1.00769630  | -2.29002700 | -0.42174050 |
| C  | 2.37764570  | -4.01160540 | -0.97023550 |
| C  | 5.05123240  | -4.48986280 | -0.52677460 |
| C  | 2.92017120  | -5.19403410 | -1.46567880 |
| C  | 3.14528930  | -3.07334280 | -0.25377580 |
| C  | 4.50465030  | -3.30509530 | -0.03117500 |
| C  | 4.27559570  | -5.42357940 | -1.22898140 |
| H  | 2.31549720  | -5.90854880 | -2.01541610 |
| H  | 5.12984530  | -2.59569240 | 0.49348810  |
| H  | 4.73535430  | -6.33620780 | -1.59611660 |
| H  | 6.10624270  | -4.68898110 | -0.36314300 |

**Pt(Py/NHC)\_S<sub>0</sub>**

|   |             |             |             |
|---|-------------|-------------|-------------|
| C | 2.47406400  | -0.62374780 | 0.43656070  |
| C | 2.81473530  | 2.04474840  | 0.86160720  |
| C | 3.66648830  | -0.19622360 | 1.00797290  |
| C | 1.40166980  | 0.21975940  | 0.09662310  |
| C | 1.64743730  | 1.59349450  | 0.21887310  |
| C | 3.82918970  | 1.17190790  | 1.27107080  |
| H | 4.43602260  | -0.91943340 | 1.23609490  |
| N | 2.24119300  | -1.98708100 | 0.05724690  |
| N | 1.12300040  | -3.46586460 | -1.11924300 |
| C | 0.15612950  | -4.02075220 | -2.05783250 |
| H | -0.66543640 | -3.31416330 | -2.16880460 |
| H | -0.22820220 | -4.98557170 | -1.70985570 |
| H | 0.63698430  | -4.15958270 | -3.03184110 |
| H | 2.91472920  | 3.10354660  | 1.06224490  |
| C | 5.07588060  | 1.72841230  | 1.98328850  |
| C | 6.09998680  | 0.62379540  | 2.30631800  |
| H | 6.46260750  | 0.12703490  | 1.39941270  |
| H | 5.67967810  | -0.14221000 | 2.96761350  |

|   |             |             |             |
|---|-------------|-------------|-------------|
| H | 6.96643430  | 1.06022460  | 2.81669970  |
| C | 4.65086080  | 2.39924630  | 3.31052030  |
| H | 3.94768590  | 3.22107680  | 3.14097360  |
| H | 5.52596850  | 2.80726680  | 3.83201210  |
| H | 4.16317840  | 1.67717420  | 3.97535430  |
| C | 5.77276680  | 2.77500500  | 1.08228570  |
| H | 5.12426320  | 3.63262640  | 0.87326930  |
| H | 6.06286620  | 2.33274580  | 0.12230900  |
| H | 6.67863660  | 3.15810330  | 1.56865320  |
| N | 0.71635040  | 2.51636580  | -0.30544870 |
| C | 0.99549550  | 3.80982610  | -0.77911340 |
| C | 0.98231400  | 6.39609460  | -1.84600060 |
| C | 2.21377070  | 4.47556270  | -0.97236100 |
| C | -0.22103220 | 4.42200430  | -1.17674460 |
| C | -0.22441920 | 5.72102930  | -1.69583360 |
| C | 2.18779630  | 5.76489430  | -1.50146700 |
| H | 3.16290610  | 4.00260960  | -0.75765190 |
| H | -1.16059500 | 6.18817900  | -1.99133130 |
| H | 3.12932890  | 6.28562530  | -1.65563890 |
| H | 0.99566100  | 7.40513800  | -2.24863170 |
| C | -0.65917850 | 2.26815980  | -0.46997220 |
| C | -3.36494350 | 2.31496740  | -0.95812140 |
| C | -1.26262810 | 3.44597470  | -0.97853900 |
| C | -1.35004640 | 1.06307050  | -0.23122280 |
| C | -2.74909280 | 1.18539260  | -0.37430560 |
| C | -2.62688090 | 3.44572110  | -1.26673810 |
| H | -3.10324310 | 4.30358710  | -1.73327030 |
| H | -4.41922780 | 2.28354900  | -1.20343790 |
| N | -3.63500750 | 0.14418870  | 0.06768490  |
| C | -4.94019840 | 0.35554890  | 0.57609750  |
| C | -7.52399000 | 0.21753180  | 1.64241080  |
| C | -5.60794480 | 1.54427370  | 0.90041900  |
| C | -5.54577150 | -0.89339380 | 0.85558080  |
| C | -6.84474210 | -0.96317730 | 1.37174450  |
| C | -6.89469470 | 1.45462390  | 1.42543790  |

|    |             |             |             |
|----|-------------|-------------|-------------|
| H  | -5.13798960 | 2.51011660  | 0.77515660  |
| H  | -7.30351510 | -1.92730120 | 1.57489120  |
| H  | -7.41809520 | 2.37212180  | 1.68002770  |
| H  | -8.53224500 | 0.18638960  | 2.04476030  |
| C  | -3.38121310 | -1.20853210 | 0.14816470  |
| C  | -3.28348740 | -3.90971440 | 0.52743010  |
| C  | -4.55005590 | -1.89788930 | 0.59594480  |
| N  | -2.20439110 | -1.81771540 | -0.08099530 |
| C  | -2.18427310 | -3.15496130 | 0.13790100  |
| C  | -4.50298790 | -3.27226650 | 0.76478670  |
| H  | -1.21772040 | -3.62244030 | 0.02767740  |
| H  | -5.37437020 | -3.82819620 | 1.09887480  |
| H  | -3.16734410 | -4.97814940 | 0.67447400  |
| Pt | -0.33081710 | -0.71545560 | -0.24530760 |
| C  | 1.00703680  | -2.25677870 | -0.48452730 |
| C  | 2.40954250  | -3.97305870 | -0.95796990 |
| C  | 5.00993750  | -4.25416540 | -0.26070350 |
| C  | 3.04523810  | -5.13090300 | -1.38242650 |
| C  | 3.13121820  | -3.02180380 | -0.20752040 |
| N  | 4.40338980  | -3.12946550 | 0.15093560  |
| C  | 4.38802800  | -5.26055280 | -1.01128330 |
| H  | 2.53805850  | -5.89281300 | -1.96605810 |
| H  | 4.95455200  | -6.13929970 | -1.30153920 |
| H  | 6.05376300  | -4.35805550 | 0.02562380  |

**Pt (NHC-2) \_S<sub>0</sub>**

|   |            |             |             |
|---|------------|-------------|-------------|
| C | 2.71319080 | -0.95695960 | -0.92146540 |
| C | 3.98201690 | 1.34722220  | -0.17853800 |
| C | 4.09608070 | -0.90313170 | -0.99687540 |
| C | 1.89817040 | 0.10763240  | -0.49467900 |
| C | 2.57984240 | 1.25359760  | -0.10501730 |
| C | 4.76148600 | 0.28258670  | -0.62695510 |
| H | 4.66451000 | -1.76838530 | -1.32309290 |
| H | 4.42955510 | 2.28436470  | 0.13088420  |
| N | 1.96417130 | -2.12361200 | -1.25187920 |

|    |             |             |             |
|----|-------------|-------------|-------------|
| N  | 0.15970290  | -3.24816480 | -1.58676600 |
| C  | 1.20915410  | -3.98490480 | -2.13070830 |
| C  | 2.34417690  | -3.27207880 | -1.92155590 |
| H  | 1.05139360  | -4.93508310 | -2.61746410 |
| H  | 3.36419260  | -3.47738100 | -2.20364830 |
| C  | -1.23353330 | -3.65135290 | -1.70087170 |
| H  | -1.50708000 | -4.36946430 | -0.92071100 |
| H  | -1.39372970 | -4.11256490 | -2.67909570 |
| H  | -1.86515750 | -2.76880860 | -1.61910970 |
| C  | 0.61303370  | -2.09172520 | -1.02322890 |
| O  | 1.98047730  | 2.37012380  | 0.40713920  |
| C  | 0.62759690  | 2.64374660  | 0.40205830  |
| C  | -1.96282610 | 3.60451900  | 0.49107930  |
| C  | 0.39079250  | 3.97871790  | 0.75679250  |
| C  | -0.39793940 | 1.72386280  | 0.10280240  |
| C  | -1.69797600 | 2.28974870  | 0.08597380  |
| C  | -0.90910060 | 4.45001730  | 0.82727130  |
| H  | 1.24196500  | 4.61347820  | 0.98159300  |
| H  | -1.10930290 | 5.47161840  | 1.13802340  |
| Pt | -0.04289100 | -0.25643320 | -0.26972100 |
| H  | -2.98185460 | 3.96215270  | 0.56923820  |
| N  | -2.84680110 | 1.50141960  | -0.30781700 |
| C  | -4.09240380 | 2.00921760  | -0.73722460 |
| C  | -6.73107530 | 2.52004300  | -1.49011950 |
| C  | -4.39631600 | 3.22954390  | -1.35059860 |
| C  | -5.10108370 | 1.02977270  | -0.54395630 |
| C  | -6.42530510 | 1.29377490  | -0.91112180 |
| C  | -5.71881850 | 3.46748270  | -1.71798000 |
| H  | -3.62575700 | 3.96274660  | -1.55439500 |
| H  | -7.19765790 | 0.54405090  | -0.75998890 |
| H  | -5.96731560 | 4.40835700  | -2.20083840 |
| H  | -7.75252030 | 2.74103890  | -1.78534100 |
| C  | -3.05493310 | 0.18308030  | 0.03339960  |
| C  | -3.83918400 | -2.28132650 | 0.85299500  |
| C  | -4.44084070 | -0.13866260 | -0.01280950 |

|   |             |             |             |
|---|-------------|-------------|-------------|
| N | -2.09191000 | -0.70288920 | 0.30820090  |
| C | -2.50048790 | -1.90664620 | 0.76567290  |
| C | -4.83437520 | -1.40068040 | 0.41395440  |
| H | -1.70349900 | -2.59113170 | 1.03105670  |
| H | -5.88040270 | -1.69465580 | 0.41540400  |
| H | -4.09123040 | -3.26854100 | 1.22544150  |
| C | 6.29578160  | 0.35271150  | -0.71822740 |
| C | 6.84426280  | 1.73124370  | -0.30598950 |
| H | 6.45204540  | 2.53017990  | -0.94533410 |
| H | 7.93653880  | 1.73760250  | -0.39708880 |
| H | 6.59763010  | 1.97427960  | 0.73369520  |
| C | 6.91693310  | -0.71234150 | 0.21642380  |
| H | 6.59499260  | -1.72546940 | -0.04853690 |
| H | 6.62661310  | -0.53292250 | 1.25804840  |
| H | 8.01209790  | -0.68342930 | 0.15654470  |
| C | 6.74163050  | 0.07929470  | -2.17429910 |
| H | 6.32419540  | 0.82812430  | -2.85710170 |
| H | 6.41854040  | -0.90696200 | -2.52588570 |
| H | 7.83515830  | 0.11790370  | -2.25227220 |

## References:

- [1] G. Li, A. Wolfe, J. Brooks, Z.-Q. Zhu, J. Li, Modifying Emission Spectral Bandwidth of Phosphorescent Platinum(II) Complexes Through Synthetic Control, *Inorg. Chem.* **2017**, *56*, 8244–8256.
- [2] N. G. Connelly, W. E. Geiger, Chemical Redox Agents for Organometallic Chemistry, *Chem. Rev.* **1996**, *96*, 877–910.
- [3] D. C. Harris, In Quantitative Chemical Analysis, 6th ed.; W. H. Freeman: New York, **2002**; pp 394–396.
- [4] G. Li, Q. Chen, J. Zheng, Q. Wang, F. Zhan, W. Lou, Y.-F. Yang, Y. She, Metal-Assisted Delayed Fluorescent Pd(II) Complexes and Phosphorescent Pt(II) Complex Based on [1,2,4]Triazolo[4,3-*a*]pyridine-containing Ligands: Synthesis, Characterization, Electrochemistry, Photophysical Studies, and Application, *Inorg. Chem.* **2019**, *58*, *21*, 14349–14360.
- [5] G. Li, F. Zhan, J. Zheng, Y.-F. Yang, Q. Wang, Q. Chen, G. Shen, Y. She, Highly Efficient Phosphorescent Tetradentate Platinum(II) Complexes Containing Fused 6/5/6 Metallocycles, *Inorg. Chem.* **2020**, *59*, 3718–3729.
- [6] Y. She, K. Xu, X. Fang, Y.-F. Yang, W. Lou, Y. Hu, Q. Zhang, G. Li, Tetradentate Platinum(II) and Palladium(II) Complexes Containing Fused 6/6/6 or 6/6/5 Metallocycles with Azacarbazolyldicarbazole-Based Ligands, *Inorg. Chem.* **2021**, *60*, 12972–12983.
- [7] H. Li, J. Ding, Z. Xie, Y. Cheng, L. Wang, Synthesis, Characterization and Electrophosphorescent Properties of Mononuclear Platinum(II) Complexes Based on 2-Phenylbenzoimidazole Derivatives, *J. Organomet. Chem.* **2009**, *694*, 2777–2785.
- [8] A. K.-W. Chan, E. S.-H. Lam, A. Y.-Y. Tam, D. P.-K. Tsang, W. H. Lam, M.-Y. Cham, W.-T. Wong, V. W.-W. Yam, Synthesis and Characterization of Luminescent Cyclometalated Platinum(II) Complexes of 1,3-Bis-Hetero-Azolybenzenes with Tunable Color for Applications in Organic Light-Emitting Devices through Extension of  $\pi$  Conjugation by Variation of the Heteroatom, *Chem. Eur. J.* **2013**, *19*, 13910–13924.
- [9] S. C. F. Kui, P. K. Chow, G. Cheng, C.-C. Kwok, C. L. Kwong, K.-H. Low, C.-M. Che, Robust Phosphorescent Platinum(II) Complexes with Tetradentate O<sup>N</sup>C<sup>N</sup> Ligands: High Efficiency OLEDs with Excellent Efficiency Stability, *Chem. Commun.* **2013**, *49*, 1497–1499.
- [10] E. Turner, N. Bakken, J. Li, Cyclometalated Platinum Complex with Luminescent Quantum Yields Approaching 100%, *Inorg. Chem.* **2013**, *52*, 7344–7351.
- [11] G. Cheng, S. C. F. Ang, W.-H. Kui, M.-Y. Ko, P.-K. Chow, C.-L. Kwong, C.-C. Kwok, C. Ma, X. Guan, K.-H. Low, S.-J. Su, C.-M. Che, Structurally Robust Phosphorescent [Pt(O<sup>N</sup>C<sup>N</sup>)] Emitters for High Performance Organic Light-Emitting Devices with Power Efficiency up to 126 lm W<sup>-1</sup> and External Quantum Efficiency over 20%, *Chem. Sci.* **2014**, *5*, 4819–4830.

- [12] B. Wang, F. Liang, H. Hu, Y. Liu, Z. Kang, L.-S. Liao, J. Fan, Strongly Phosphorescent Platinum(II) Complexes Supported by Tetradentate Benzazole-Containing Ligands, *J. Mater. Chem. C* **2015**, *3*, 8212–8218.
- [13] G. Li, T. Fleetham, E. Turner, X.-C. Hang, J. Li, Highly Efficient and Stable Narrow-Band Phosphorescent Emitters for OLED Applications, *Adv. Optical Mater.* **2015**, *3*, 390–397.
- [14] X.-Q. Zhang, Y.-M. Xie, Y. Zheng, F. Liang, B. Wang, J. Fan, L.-S. Liao, Highly Phosphorescent Platinum(II) Complexes Based on Rigid Unsymmetric Tetradentate Ligands, *Org. Electron.* **2016**, *32*, 120–125.
- [15] Z.-Q. Zhu, K. Klimes, S. Holloway, J. Li, Efficient Cyclometalated Platinum(II) Complex with Superior Operational Stability, *Adv. Mater.* **2017**, *29*, 1605002.
- [16] G. Liu, Y.-M. Xie, F. Liang, Y. Zhao, H. Hu, J. Fan, L.-S. Liao, Phosphorescent Platinum(II) Complexes Based on Spiro Linkage-Containing Ligands, *J. Mater. Chem. C* **2017**, *5*, 1944–1951.
- [17] J. Li, F. Liang, Y. Zhao, X.-Y. Liu, J. Fan, L.-S. Liao, Highly Phosphorescent Cyclometalated Platinum(II) Complexes Based on 2-Phenylbenzimidazole-Containing Ligands, *J. Mater. Chem. C* **2017**, *5*, 6202–6209.
- [18] H. Fukagawa, T. Oono, Y. Iwasaki, T. Hatakeyama, T. Shimizu, High-Efficiency Ultrapure Green Organic Light-Emitting Diodes, *Mater. Chem. Front.* **2018**, *2*, 704–709.
- [19] D. Zhao, C.-C. Huang, X.-Y. Liu, B. Song, L. Ding, M.-K. Fung, J. Fan, Efficient OLEDs with Saturated Yellow and Red Emission Based on Rigid Tetradentate Pt(II) Complexes, *Org. Electron.* **2018**, *62*, 542–547.
- [20] G. Cheng, Y. Kwak, W.-P. To, T.-L. Lam, G. S. M. Tong, M.-K. Sit, S. Gong, B. Choi, W. Choi, C. Yang, C.-M. Che, High-Efficiency Solution-Processed Organic Light-Emitting Diodes with Tetradentate Platinum(II) Emitters, *ACS Appl. Mater. Interfaces* **2019**, *11*, 45161–45170.
- [21] G. Li, G. Shen, X. Fang, Y.-F. Yang, F. Zhan, J. Zheng, W. Lou, Q. Zhang, Y. She, Phosphorescent Tetradentate Platinum(II) Complexes Containing Fused 6/5/5 or 6/5/6 Metallocycles, *Inorg. Chem.* **2020**, *59*, 18109–18121.
- [22] G. Li, H. Guo, X. Fang, Y.-F. Yang, Y. Sun, W. Lou, Q. Zhang, Y. She, Tuning the Excited State of Tetradentate Pd(II) and Pt(II) Complexes Through Benzannulated *N*-Heteroaromatic Ring and Central Metal, *Chin. J. Chem.*, **2022**, *40*, 223–234.
- [23] T. Fleetham, G. Li, L. Wen, J. Li, Efficient “Pure” Blue OLEDs Employing Tetradentate Pt Complexes with Narrow Spectral Bandwidth, *Adv. Mater.* **2014**, *26*, 7116–7121.
- [24] G. Li, J. Zheng, X. Fang, K. Xu, Y.-F. Yang, J. Wu, J. Li, Y. She, *N*-Heterocyclic Carbene-Based Tetradentate Palladium(II) Complexes for Deep-Blue Phosphorescent Materials, *Organometallics* **2021**, *40*, 472–481.

- [25] X. Zhao, Y. She, K. Fang, G. Li, CuCl-Catalyzed Ullmann-Type C-N Cross-Coupling Reaction of Carbazoles and 2-Bromopyridine Derivatives, *J. Org. Chem.* **2017**, 82, 1024–1033.
- [26] G. Li, X. Zhao, K. Fang, J. Li, Y. She, CuCl-Catalyzed Hydroxylation of *N*-Heteroarylcarbazole Bromide: Approach for the Preparation of *N*-Heteroarylcarbazolyl Phenols and Its Application in the Synthesis of Phosphorescent Emitters, *J. Org. Chem.* **2017**, 82, 8634–8644.
